# Supplementary material for: Effect of the enamine pyramidalization direction on the reactivity of secondary amine organocatalysts
Source: PubMed Central journal article supplement — Chem Sci. 2020 Jan 7;11(7):1943–7. doi: 10.1039/c9sc05410c (PMC8148379; doi:10.1039/c9sc05410c), 2020-01-07
Supplement: SC-011-C9SC05410C-s001.pdf [file SC-011-C9SC05410C-s001.pdf]

## Effect of the Enamine Pyramidalization Direction on the Reactivity of Secondary Amine Organocatalysts

Tobias Schnitzer,<sup>‡</sup> Jasper S. Möhler<sup>‡</sup> and Helma Wennemers<sup>\*</sup>

ETH Zürich, Laboratory of Organic Chemistry  
Department of Chemistry and Applied Biosciences  
Vladimir-Prelog-Weg 3, CH-8093 Zürich (Switzerland)  
E-mail: Helma.Wennemers@org.chem.ethz.ch

### Supporting Information

|                                                                                                                                            |           |
|--------------------------------------------------------------------------------------------------------------------------------------------|-----------|
| <b>1. General Aspects and Materials</b> .....                                                                                              | <b>2</b>  |
| <b>2. Synthesis and Analytical Data of the Peptides</b> .....                                                                              | <b>3</b>  |
| <b>3. Computational Analysis of the Enamines</b> .....                                                                                     | <b>7</b>  |
| <b>4. Preparation and NMR Spectroscopic Analysis of the Enamines</b> .....                                                                 | <b>60</b> |
| 4.1. Enamines <b>3a`</b> , <b>3`</b> and <b>3b`</b> .....                                                                                  | 60        |
| 4.2. Enamines <b>2a-En</b> , <b>2-En</b> and <b>2b-En</b> .....                                                                            | 63        |
| <b>5. In Situ IR Monitoring – Kinetic Experiments</b> .....                                                                                | <b>66</b> |
| 5.1 Determination of Rate Orders and Activation Energies Using 3 mol% of<br>Catalysts <b>2a</b> , <b>2</b> , <b>2b</b> and <b>2c</b> ..... | 68        |
| 5.2 Kinetic Profiles Using 1 mol% of Catalysts <b>2a</b> , <b>2</b> and <b>2b</b> .....                                                    | 79        |
| 5.3 Kinetic Profiles Using 3 mol% of Catalysts <b>1a</b> , <b>1</b> and <b>1b</b> .....                                                    | 80        |
| <b>6. NMR Spectra of the Peptides in CDCl<sub>3</sub>/CD<sub>3</sub>OH 9:1</b> .....                                                       | <b>81</b> |
| <b>7. ROESY Spectra of the TFA-salts of 2a, 2, and 2b in CDCl<sub>3</sub>/CD<sub>3</sub>OH 9:1</b> .....                                   | <b>86</b> |
| <b>8. References</b> .....                                                                                                                 | <b>89</b> |

## 1. General Aspects and Materials

Reagents and materials were of the highest commercially available grade and used without further purification. Reactions were monitored by thin layer chromatography using Merck silica gel 60 F254 aluminium sheets. Visualization of the compounds was achieved by UV-Vis or  $\text{KMnO}_4$ . Flash chromatography and plug filtrations were performed using silica gel 60 (particle size 0.040 – 0.063 mm, 200 – 400 mesh) manufactured by Fluka. Solvents for extraction and chromatography were of technical quality and distilled before use.  $^1\text{H}$  and  $^{13}\text{C}$  NMR spectra were recorded on a Bruker DRX 400, a Bruker AV III 400 (400 MHz/100 MHz) or a Bruker AV III 600 (600 MHz/150 MHz). All spectra were recorded at 25 °C, unless stated otherwise. Chemical shifts ( $\delta$ ) are reported in parts per million (ppm) relative to the signal of tetramethylsilane (TMS) using the residual solvent signals. SFC analyses were performed on an analytical SFC with a diode array detector ACQUITY-UPLC-PDA from Waters using chiral stationary phase columns (Trefoil, AS, AD, IA, Whelk, IC, OD, OJ) (150 mm x 30 mm) from Daicel or Waters under the reported conditions. HPLC analyses were performed on an analytical Ultimate 3000 HPLC system from Dionex with a diode array detector and chiral stationary phase columns (Daicel AD-H, Daicel AS-H, AY-H, OD-H or Daicel OJ-H). High-resolution electron ionization (HR-EI) mass spectra were measured on a Waters Micromass AutoSpec Ultima spectrometer. High-resolution MALDI spectra were acquired on a Bruker solariX 94 (ESI/MALDI-FT-ICR) and a Bruker Ultra-Flex II (MALDI-TOF) spectrometer. In-situ FT-IR spectroscopy was carried out on a ReactIR R4000 (SiComb probe) with a spectral range of 4000–650  $\text{cm}^{-1}$ .

## 2. Synthesis and Analytical Data of the Peptides

### 2.1. General Protocols for Solid Phase Peptide Synthesis

Peptides were prepared on solid phase using Rink Amide resin. The general protocol for Fmoc/*t*Bu peptide synthesis was followed according to the general procedures below.

**General procedure for peptide couplings:** *i*Pr<sub>2</sub>NEt (6 equiv.) was added to a solution of Fmoc-Xaa-OH (3 equiv.) and HATU (3 equiv.) in DMF. The solution of the activated amino acid ( $\approx$  100 mM) was added to the amino-functionalized resin (preswollen in CH<sub>2</sub>Cl<sub>2</sub>) and the mixture was agitated for 1 h before washing with DMF (3  $\times$ ) and CH<sub>2</sub>Cl<sub>2</sub> (3  $\times$ ).

**General procedure for Fmoc-deprotections:** A solution of 20% piperidine in DMF was added to the resin (preswollen in CH<sub>2</sub>Cl<sub>2</sub>) and the reaction mixture was agitated for 10 min, drained and the piperidine treatment was repeated for 10 min. Finally, the resin was washed with DMF (3  $\times$ ) and CH<sub>2</sub>Cl<sub>2</sub> (3  $\times$ ). The couplings as well as the Fmoc-deprotections were monitored by qualitative Kaiser (primary amines),<sup>1</sup> and chloranil tests (secondary amines).<sup>2</sup>

**General procedure for side chain deprotection and cleavage of the peptides from the solid support:** The peptides were side-chain deprotected and cleaved from the resin by shaking in a mixture of TFA/TIS/H<sub>2</sub>O (95:2.5:2.5) for 1 h and a second time for 30 min. Pooling of the filtrates and removal of all volatiles under reduced pressure followed by precipitation and thorough washing with Et<sub>2</sub>O afforded the peptides as their TFA-salts. The peptides were redissolved in MeCN/H<sub>2</sub>O 1:1, dried by lyophilisation and used without further purification.

## 2.2. Analytical Data of Peptides

**TFA·H-DPro-Pro-Glu-NH<sub>2</sub> (1):** The peptide was synthesized according to the general procedures for solid phase peptide synthesis. The analytical data is in agreement with the previously published data.<sup>3,4</sup>

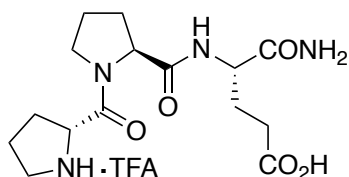

**TFA·H-DAze-Pro-Glu-NH<sub>2</sub> (1a):** The peptide was synthesized according to the general procedures for solid phase peptide synthesis. Only the signals of the *trans* isomer are reported (*trans/cis* amide bond ratio: 18:1).

<sup>1</sup>H NMR (600 MHz, CDCl<sub>3</sub>/CD<sub>3</sub>OH 9:1)  $\delta$  = 8.76 (d, *J* = 7.2 Hz, 1H), 7.08 (s, 1H), 6.34 (s, 1H), 5.50 – 5.38 (m, 1H), 4.48 (dd, *J* = 8.8, 4.0 Hz, 1H), 4.38 (td, *J* = 7.5, 3.1 Hz, 1H), 4.29 (ddd, *J* = 10.4, 9.4, 7.8 Hz, 1H), 3.97 (td, *J* = 10.2, 6.2 Hz, 1H), 3.73 (dt, *J* = 9.8, 6.1 Hz, 1H), 3.34 (dt, *J* = 9.8, 7.5 Hz, 1H), 2.97 – 2.88 (m, 1H), 2.64 – 2.40 (m, 3H), 2.32 – 2.23 (m, 1H), 2.22 – 2.09 (m, 2H), 2.09 – 2.02 (m, 2H), 1.98 (ddt, *J* = 14.4, 10.5, 3.6 Hz, 1H). <sup>13</sup>C NMR (151 MHz, CDCl<sub>3</sub>/CD<sub>3</sub>OH 9:1)  $\delta$  = 178.4, 174.5, 171.1, 167.5, 61.7, 58.1, 53.3, 46.9, 43.4, 30.4, 29.4, 25.4, 24.7, 22.5. **HRMS** (MALDI): *m/z* calcd. for [M + Na]<sup>+</sup> C<sub>14</sub>H<sub>22</sub>N<sub>4</sub>NaO<sub>5</sub><sup>+</sup>: 349.1482; found: 349.1482.

**TFA·H-DPip-Pro-Glu-NH<sub>2</sub> (1b):** The peptide was synthesized according to the general procedures for solid phase peptide synthesis. Only the signals of the *trans* isomer are reported (*trans/cis* amide bond ratio: 25:1).

<sup>1</sup>H NMR (600 MHz, CDCl<sub>3</sub>/CD<sub>3</sub>OH 9:1)  $\delta$  = 8.43 (d, *J* = 7.4 Hz, 1H), 7.08 (s, 1H), 6.34 (s, 1H), 4.37 (dq, *J* = 7.9, 3.7 Hz, 2H), 4.14 (dd, *J* = 11.7, 3.1 Hz, 1H), 3.91 (ddd, *J* = 9.8, 7.5, 4.4 Hz, 1H), 3.49 – 3.40 (m, 2H), 3.10 (td, *J* = 12.9, 3.3 Hz, 1H), 2.49 – 2.33 (m, 2H), 2.31 – 1.97 (m, 8H), 1.95 – 1.86 (m, 1H), 1.82 – 1.58 (m, 3H). <sup>13</sup>C NMR (151 MHz, CDCl<sub>3</sub>/CD<sub>3</sub>OH 9:1)  $\delta$  = 178.0, 175.0, 171.7, 169.1, 62.1, 57.1, 53.6, 47.5, 43.9, 31.4, 29.5, 25.9, 25.6, 24.7, 21.9, 21.9. **HRMS** (MALDI): *m/z* calcd. for [M + Na]<sup>+</sup> C<sub>16</sub>H<sub>26</sub>N<sub>4</sub>NaO<sub>5</sub><sup>+</sup>: 377.1795; found: 377.1798.

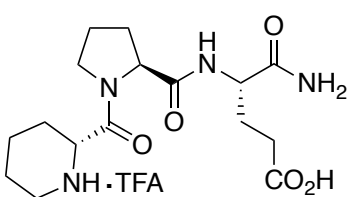

**TFA·H-DPro-Pip-Glu-NH<sub>2</sub> (2):** The peptide was synthesized according to the general procedures for solid phase peptide synthesis. The analytical data is in agreement with the previously published data.<sup>4</sup>

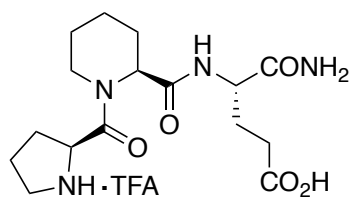

**TFA·H-DAze-Pip-Glu-NH<sub>2</sub> (2a):** The peptide was synthesized according to the general procedures for solid phase peptide synthesis. Only the signals of the *trans* isomer are reported (*trans/cis* amide bond ratio: 20:1).

**<sup>1</sup>H NMR** (600 MHz, CDCl<sub>3</sub>/CD<sub>3</sub>OH 9:1)  $\delta$  = 8.41 (d, *J* = 6.5 Hz, 1H), 7.03 (s, 1H), 6.16 (s, 1H), 5.72 – 5.56 (m, 1H), 5.23 – 5.12 (m, 1H), 4.34 (ddd, *J* = 7.8, 6.5, 3.3 Hz, 1H), 4.29 (ddd, *J* = 10.4, 9.5, 7.6 Hz, 1H), 4.02 – 3.95 (m, 1H), 3.41 – 3.37 (m, 1H), 3.08 (ddd, *J* = 13.7, 12.5, 2.9 Hz, 1H), 2.94 (dtd, *J* = 11.9, 9.6, 6.3 Hz, 1H), 2.62 – 2.46 (m, 4H), 2.14 (dtd, *J* = 15.2, 7.6, 2.9 Hz, 1H), 1.97 (ddt, *J* = 15.1, 9.8, 3.0 Hz, 1H), 1.82 – 1.67 (m, 2H), 1.60 – 1.33 (m, 3H). **<sup>13</sup>C NMR** (151 MHz, CDCl<sub>3</sub>/CD<sub>3</sub>OH 9:1)  $\delta$  = 178.6, 174.2, 169.8, 168.2, 57.6, 54.1, 54.0, 43.7, 43.1, 30.3, 25.3, 25.2, 24.9, 23.0, 20.4. **HRMS** (MALDI): *m/z* calcd. for [M + Na]<sup>+</sup> C<sub>15</sub>H<sub>24</sub>N<sub>4</sub>NaO<sub>5</sub><sup>+</sup>: 363.1639; found: 363.1642.

**TFA·H-DPip-Pip-Glu-NH<sub>2</sub> (2b):** The peptide was synthesized according to the general procedures for solid phase peptide synthesis. Only the signals of the *trans* isomer are reported (*trans/cis* amide bond ratio: 30:1).

**<sup>1</sup>H NMR** (600 MHz, CDCl<sub>3</sub>/CD<sub>3</sub>OH 9:1)  $\delta$  = 8.03 (d, *J* = 6.8 Hz, 1H), 7.15 (s, 1H), 6.14 (s, 1H), 5.21 – 5.04 (m, 1H), 4.42 (dd, *J* = 11.5, 3.3 Hz, 1H), 4.33 (ddd, *J* = 8.1, 6.7, 3.8 Hz, 1H), 3.69 (d, *J* = 13.7 Hz, 1H), 3.54 (d, *J* = 12.9 Hz, 1H), 3.12 (tt, *J* = 12.5, 3.4 Hz, 2H), 2.61 – 2.36 (m, 3H), 2.16 – 1.35 (m, 13H). **<sup>13</sup>C NMR** (151 MHz, CDCl<sub>3</sub>/CD<sub>3</sub>OH 9:1)  $\delta$  = 178.8, 174.6, 170.2, 169.6, 55.9, 54.3, 53.8, 44.0, 43.9, 31.2, 26.9, 25.5, 25.3, 25.0, 22.0, 21.8, 20.3. **HRMS** (MALDI): *m/z* calcd. for [M + H]<sup>+</sup> C<sub>17</sub>H<sub>29</sub>N<sub>4</sub>O<sub>5</sub><sup>+</sup>: 369.2132; found: 369.2130.

**TFA·H-MetPro-DPip-DGlu-NH<sub>2</sub> (2c):** The peptide was synthesized according to the general procedures for solid phase peptide synthesis. Only the signals of the *trans* isomer are reported.

**<sup>1</sup>H NMR** (600 MHz, CDCl<sub>3</sub>/CD<sub>3</sub>OH 9:1)  $\delta$  = 8.35 (d, *J* = 6.6 Hz, 1H), 6.95 (s, 1H), 6.13 (s, 1H), 5.15 (dd, *J* = 11.6, 4.1 Hz, 1H), 5.04 – 4.89 (m, 1H), 4.24 (ddd, *J* = 8.0, 6.6,

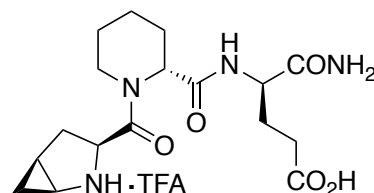

3.3 Hz, 1H, e-a), 3.53 – 3.47 (m, 1H, solvent suppr.) 3.42 (ddd,  $J = 6.8, 5.8, 2.7$  Hz, 1H, solvent suppr.), 3.02 – 2.91 (m, 1H), 2.86 – 2.80 (m, 1H), 2.54 – 2.34 (m, 3H), 2.06 – 1.99 (m, 1H), 1.96 – 1.91 (m, 1H), 1.90 – 1.83 (m, 1H), 1.82 – 1.78 (m, 1H), 1.73 – 1.66 (m, 2H), 1.47 – 1.33 (m, 3H), 0.92 (ddd,  $J = 8.7, 7.1, 1.3$  Hz, 1H), 0.86 (ddd,  $J = 7.5, 5.3, 2.7$  Hz, 1H).  **$^{13}\text{C}$  NMR** (151 MHz,  $\text{CDCl}_3/\text{CD}_3\text{OH}$  9:1)  $\delta = 178.7, 174.3, 170.6, 169.7, 60.9, 54.2, 53.9, 43.8, 37.7, 32.0, 30.5, 25.3, 24.8, 24.7, 20.2, 18.2, 11.2$ . **HRMS** (ESI):  $m/z$  calcd. for  $[\text{M} + \text{H}]^+$   $\text{C}_{17}\text{H}_{27}\text{N}_4\text{O}_5^+$ : 367.1976; found: 367.1974.

### 3. Computational Analysis of the Enamines

**General Procedure:** Conformational searches (10,000 steps) were performed using MacroModel 11.0 with the OPLS3e force field<sup>5</sup> in CHCl<sub>3</sub> or DMSO and a cutoff of 21 kJ/mol. Jaguar<sup>6</sup> was used to perform geometry optimizations of all obtained conformers at the M06-2X-D3/6-31+G\*\* level of theory.<sup>7</sup> Solvation corrections were performed on gas-phase geometries using a PBF implicit solvent model for CHCl<sub>3</sub> or DMSO. Frequency calculations on the optimized structures yielded no imaginary frequencies, indicating stationary points on the potential energy surface. All energies are listed in kcal/mol relative to the conformation with the lowest total free energy for each derivative. The population of the structures was calculated according to the Boltzmann distribution (only structures with a population of >3% are listed). Positive pyramidalization  $\Delta$  refers to an *endo*, negative to an *exo* pyramidalized enamine nitrogen. To determine the degree of N pyramidalization ( $\Delta$ ), the Boltzmann weighted average over the absolute values of all obtained structures was calculated.

#### Conformational Analysis of 3a, 3 and 3b in CHCl<sub>3</sub>:

|               | Total Free Energy (au) | Relative Energy (kcal/mol) | Population (%) | Pyramidalization $\Delta$ (Å) |
|---------------|------------------------|----------------------------|----------------|-------------------------------|
| <b>3a I</b>   | -328.981568            | 0.00                       | 68.5           | 0.415                         |
| <b>3a II</b>  | -328.980833            | 0.46                       | 31.5           | 0.423                         |
| <b>3 I</b>    | -368.277321            | 0.00                       | 35.8           | 0.212                         |
| <b>3 II</b>   | -368.277222            | 0.06                       | 32.3           | 0.230                         |
| <b>3 III</b>  | -368.276650            | 0.42                       | 17.6           | -0.270                        |
| <b>3 IV</b>   | -368.276169            | 0.72                       | 10.6           | 0.247                         |
| <b>3 V</b>    | -368.275100            | 1.35                       | 3.4            | 0.259                         |
| <b>3b I</b>   | -407.548874            | 0.00                       | 55.0           | -0.322                        |
| <b>3b II</b>  | -407.547919            | 0.60                       | 20.0           | 0.358                         |
| <b>3b III</b> | -407.547680            | 0.75                       | 15.5           | -0.268                        |
| <b>3b IV</b>  | -407.546587            | 1.44                       | 4.9            | -0.324                        |
| <b>3c I</b>   | -406.333674            | 0.00                       | 71.3           | 0.241                         |
| <b>3c II</b>  | -406.332816            | 0.54                       | 28.7           | 0.294                         |

**3a I:**

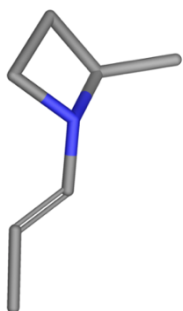

**3a II:**

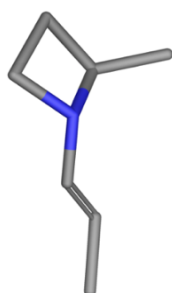

**3 I:**

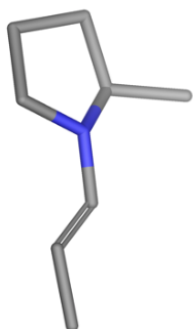

**3 II:**

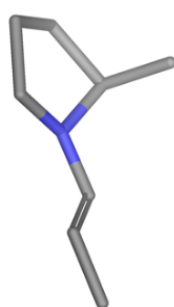

**3 III:**

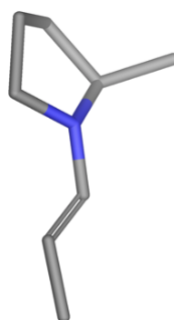

**3 IV:**

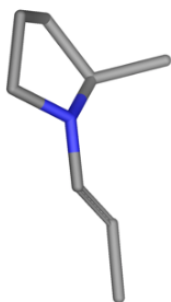

**3 V:**

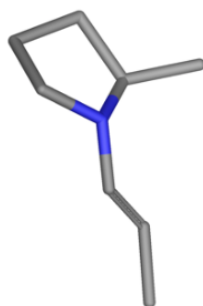



**3b I:**

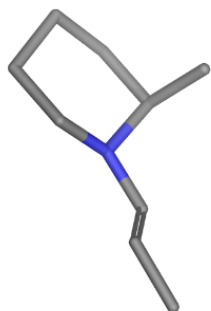

**3b II:**

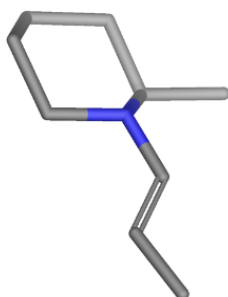

**3b III:**

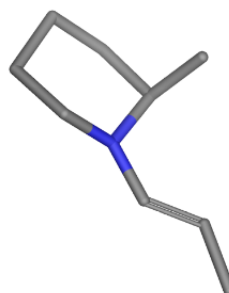

**3b IV:**

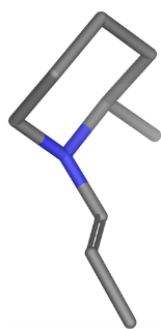

**3c I:**

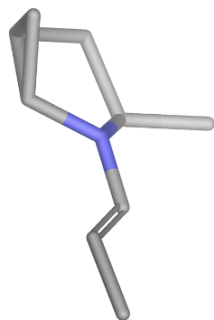

**3c II:**

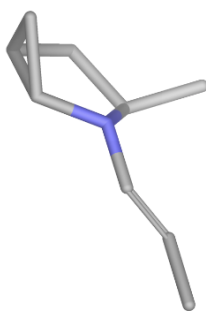

Distances and angles found in the lowest energy structures of **3a**, **3** and **3b**:

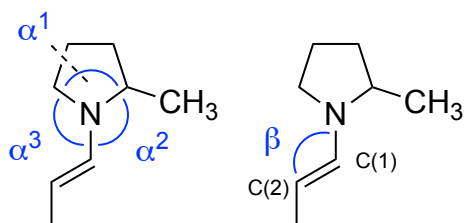

CHCl<sub>3</sub>:

|               | d(N–C(1)) | d(C(1)–C(2)) | $\alpha^1$ | $\alpha^2$ | $\alpha^3$ | $\beta$ |
|---------------|-----------|--------------|------------|------------|------------|---------|
| <b>3a I</b>   | 1.39      | 1.34         | 91.4       | 121.4      | 122.2      | 125.7   |
| <b>3a II</b>  | 1.40      | 1.34         | 91.4       | 122.2      | 120.6      | 126.2   |
| <b>3 I</b>    | 1.38      | 1.35         | 112.4      | 120.6      | 120.5      | 126.7   |
| <b>3 II</b>   | 1.38      | 1.35         | 111.5      | 121.1      | 119.7      | 126.7   |
| <b>3 III</b>  | 1.38      | 1.35         | 109.9      | 119.7      | 119.9      | 126.7   |
| <b>3 IV</b>   | 1.38      | 1.35         | 111.3      | 120.8      | 119.1      | 127.6   |
| <b>3 V</b>    | 1.38      | 1.35         | 111.1      | 119.9      | 119.4      | 127.7   |
| <b>3b I</b>   | 1.40      | 1.34         | 115.4      | 113.8      | 116.3      | 128.2   |
| <b>3b II</b>  | 1.40      | 1.34         | 113.0      | 114.8      | 114.5      | 127.8   |
| <b>3b III</b> | 1.39      | 1.35         | 115.4      | 118.4      | 116.0      | 128.7   |
| <b>3b IV</b>  | 1.40      | 1.34         | 111.0      | 117.2      | 117.2      | 128.5   |

## Coordinates of the Calculated Lowest Energy Structures:

### 3a I:

|   |          |          |          |
|---|----------|----------|----------|
| N | -0.13380 | -0.08030 | 0.28430  |
| C | -0.42090 | 1.21730  | -0.37440 |
| C | -1.70970 | 0.58500  | -0.94580 |
| C | -1.08110 | -0.78040 | -0.59820 |
| C | -0.52640 | 2.41310  | 0.54870  |
| C | 1.17290  | -0.52570 | 0.47140  |
| C | 1.60690  | -1.78130 | 0.28410  |
| C | 3.01210  | -2.22700 | 0.57930  |
| H | 0.30450  | 1.41220  | -1.18060 |
| H | -1.93170 | 0.77790  | -1.99570 |
| H | -2.58370 | 0.81350  | -0.32960 |
| H | -0.57180 | -1.24080 | -1.45900 |
| H | -1.70630 | -1.53100 | -0.10590 |
| H | -0.83310 | 3.30170  | -0.01330 |
| H | -1.26400 | 2.21830  | 1.33370  |
| H | 0.43650  | 2.62940  | 1.02400  |
| H | 1.85220  | 0.24810  | 0.83590  |
| H | 0.90570  | -2.53710 | -0.07020 |
| H | 3.03820  | -2.98910 | 1.36740  |
| H | 3.48830  | -2.66740 | -0.30400 |
| H | 3.62940  | -1.38520 | 0.90900  |

### 3a II:

|   |          |          |          |
|---|----------|----------|----------|
| N | -0.12000 | -0.05340 | 0.27640  |
| C | -0.42240 | 1.20520  | -0.43690 |
| C | -1.69700 | 0.53590  | -0.99650 |
| C | -1.06030 | -0.80790 | -0.58200 |
| C | -0.56790 | 2.44340  | 0.42730  |
| C | 1.18650  | -0.50520 | 0.46580  |
| C | 2.29960  | 0.24230  | 0.40610  |
| C | 3.67520  | -0.29170 | 0.69800  |
| H | 0.31530  | 1.37680  | -1.23950 |
| H | -1.90820 | 0.67850  | -2.05660 |
| H | -2.58130 | 0.78240  | -0.40230 |
| H | -0.55260 | -1.30320 | -1.42180 |
| H | -1.68580 | -1.53300 | -0.05390 |
| H | -1.30210 | 2.26130  | 1.21870  |
| H | 0.38250  | 2.71850  | 0.89600  |
| H | -0.90760 | 3.28980  | -0.17910 |
| H | 1.24770  | -1.56720 | 0.71420  |
| H | 2.22010  | 1.30140  | 0.16150  |
| H | 3.64390  | -1.36640 | 0.90270  |
| H | 4.35520  | -0.12950 | -0.14580 |
| H | 4.12460  | 0.20120  | 1.56820  |

### 3 I:

|   |          |         |          |
|---|----------|---------|----------|
| N | -0.17810 | 2.37860 | -0.76940 |
| C | -1.62590 | 2.13850 | -0.64810 |
| C | -1.86390 | 0.94000 | -1.58590 |
| C | 0.47590  | 1.40210 | -1.62650 |
| C | -2.02520 | 1.85730 | 0.79960  |

|   |          |          |          |
|---|----------|----------|----------|
| C | 0.33480  | 3.65190  | -0.63930 |
| C | 1.53110  | 4.08690  | -1.08280 |
| C | 2.02930  | 5.48820  | -0.85170 |
| C | -0.50460 | 0.22960  | -1.62920 |
| H | -2.17930 | 3.01720  | -1.00660 |
| H | -2.12290 | 1.29860  | -2.58820 |
| H | -2.67810 | 0.29940  | -1.23570 |
| H | 0.62150  | 1.80600  | -2.64450 |
| H | 1.46380  | 1.13570  | -1.23270 |
| H | -1.54700 | 0.93760  | 1.15530  |
| H | -1.70860 | 2.67700  | 1.45310  |
| H | -3.11140 | 1.74640  | 0.88660  |
| H | -0.32170 | 4.33870  | -0.10060 |
| H | 2.19000  | 3.40460  | -1.61700 |
| H | 1.28440  | 6.08510  | -0.31540 |
| H | 2.95260  | 5.50280  | -0.26020 |
| H | 2.24950  | 6.00220  | -1.79460 |
| H | -0.35860 | -0.38040 | -0.73130 |
| H | -0.38500 | -0.41690 | -2.50140 |

**3 II:**

|   |          |          |          |
|---|----------|----------|----------|
| N | -0.17880 | 2.37850  | -0.75370 |
| C | -1.62330 | 2.13430  | -0.65510 |
| C | -1.69670 | 0.62490  | -0.88580 |
| C | 0.47060  | 1.40520  | -1.62940 |
| C | -2.21010 | 2.57410  | 0.67920  |
| C | 0.33810  | 3.65320  | -0.64520 |
| C | 1.55300  | 4.06690  | -1.05560 |
| C | 2.05100  | 5.47050  | -0.84240 |
| C | -0.63040 | 0.38030  | -1.95840 |
| H | -2.15780 | 2.64980  | -1.47420 |
| H | -1.43210 | 0.10950  | 0.04620  |
| H | -2.69630 | 0.30100  | -1.18710 |
| H | 0.85100  | 1.89450  | -2.53860 |
| H | 1.33080  | 0.95150  | -1.12030 |
| H | -1.66130 | 2.10230  | 1.50150  |
| H | -2.17270 | 3.65940  | 0.81270  |
| H | -3.26070 | 2.27050  | 0.73620  |
| H | -0.32270 | 4.36230  | -0.14530 |
| H | 2.23090  | 3.36580  | -1.53870 |
| H | 1.28670  | 6.08870  | -0.36020 |
| H | 2.94530  | 5.49520  | -0.20800 |
| H | 2.32110  | 5.95480  | -1.78800 |
| H | -1.04710 | 0.58990  | -2.94890 |
| H | -0.25650 | -0.64600 | -1.96580 |

**3 III:**

|   |          |         |          |
|---|----------|---------|----------|
| N | -0.27820 | 2.52020 | -1.08650 |
| C | -1.57660 | 2.08920 | -0.55490 |
| C | -1.91810 | 0.93960 | -1.50710 |
| C | 0.49150  | 1.35890 | -1.52200 |
| C | -1.50600 | 1.64300 | 0.90860  |
| C | 0.37010  | 3.60290 | -0.51990 |
| C | 1.69770  | 3.82150 | -0.49280 |
| C | 2.30780  | 5.07790 | 0.06640  |

|   |          |          |          |
|---|----------|----------|----------|
| C | -0.56000 | 0.24760  | -1.73790 |
| H | -2.28760 | 2.91860  | -0.64970 |
| H | -2.30160 | 1.35000  | -2.44650 |
| H | -2.67300 | 0.26500  | -1.09380 |
| H | 1.05090  | 1.60320  | -2.43260 |
| H | 1.22970  | 1.06630  | -0.75790 |
| H | -0.82080 | 0.79610  | 1.03070  |
| H | -2.49490 | 1.33580  | 1.26280  |
| H | -1.15070 | 2.45790  | 1.54740  |
| H | -0.30910 | 4.34940  | -0.10250 |
| H | 2.37600  | 3.08110  | -0.91210 |
| H | 2.85180  | 5.64550  | -0.69820 |
| H | 1.53750  | 5.73580  | 0.48100  |
| H | 3.02440  | 4.85870  | 0.86640  |
| H | -0.41050 | -0.55760 | -1.01350 |
| H | -0.48990 | -0.19740 | -2.73270 |

**3 IV:**

|   |          |          |          |
|---|----------|----------|----------|
| N | -0.17690 | 2.37310  | -0.74250 |
| C | -1.62370 | 2.13640  | -0.65830 |
| C | -1.83720 | 0.86150  | -1.50010 |
| C | 0.47030  | 1.40770  | -1.63270 |
| C | -2.07750 | 1.97740  | 0.79240  |
| C | 0.33700  | 3.65390  | -0.64980 |
| C | -0.31050 | 4.77480  | -0.27980 |
| C | 0.37400  | 6.10950  | -0.16220 |
| C | -0.45390 | 0.19890  | -1.53380 |
| H | -2.15890 | 2.98390  | -1.11330 |
| H | -2.14070 | 1.13050  | -2.51760 |
| H | -2.61530 | 0.21960  | -1.07740 |
| H | 0.51160  | 1.77590  | -2.67190 |
| H | 1.49400  | 1.20560  | -1.30110 |
| H | -1.63880 | 1.07150  | 1.22550  |
| H | -3.16850 | 1.89640  | 0.84610  |
| H | -1.76240 | 2.83190  | 1.39860  |
| H | 1.40150  | 3.70840  | -0.88780 |
| H | -1.36790 | 4.73800  | -0.02450 |
| H | 0.34700  | 6.49440  | 0.86450  |
| H | 1.42450  | 6.04020  | -0.46260 |
| H | -0.10350 | 6.86630  | -0.79530 |
| H | -0.26110 | -0.34060 | -0.60010 |
| H | -0.33040 | -0.49820 | -2.36570 |

**3 V:**

|   |          |         |          |
|---|----------|---------|----------|
| N | -0.17220 | 2.37000 | -0.73550 |
| C | -1.62120 | 2.14220 | -0.66000 |
| C | -1.82560 | 0.82700 | -1.42620 |
| C | 0.47070  | 1.40180 | -1.63820 |
| C | -2.13860 | 2.08640 | 0.77440  |
| C | 0.32940  | 3.65710 | -0.64960 |
| C | -0.33090 | 4.77700 | -0.29660 |
| C | 0.34130  | 6.12050 | -0.20580 |
| C | -0.69220 | 0.83080 | -2.45320 |
| H | -2.13300 | 2.95820 | -1.19940 |
| H | -2.82280 | 0.76760 | -1.86950 |

|   |          |          |          |
|---|----------|----------|----------|
| H | -1.70850 | -0.02120 | -0.73940 |
| H | 1.22800  | 1.89180  | -2.25670 |
| H | 0.96390  | 0.60590  | -1.06430 |
| H | -1.65150 | 1.26580  | 1.31180  |
| H | -1.93900 | 3.01600  | 1.31470  |
| H | -3.22030 | 1.91160  | 0.77750  |
| H | 1.39380  | 3.72390  | -0.88210 |
| H | -1.38890 | 4.73710  | -0.04660 |
| H | 1.39370  | 6.05330  | -0.50060 |
| H | -0.13960 | 6.85930  | -0.85770 |
| H | 0.30810  | 6.52920  | 0.81160  |
| H | -0.47530 | -0.15750 | -2.86590 |
| H | -0.93510 | 1.50560  | -3.28180 |

**3b I:**

|   |          |          |          |
|---|----------|----------|----------|
| N | 1.29540  | -1.57240 | -1.98100 |
| C | 1.94660  | -2.77700 | -1.42640 |
| C | 2.85610  | -3.40600 | -2.48630 |
| C | 2.20010  | -0.57220 | -2.53860 |
| C | 2.68890  | -2.49560 | -0.11290 |
| C | 0.24420  | -1.08860 | -1.19930 |
| C | -0.09920 | 0.19000  | -0.96790 |
| C | -1.32340 | 0.57190  | -0.18070 |
| C | 3.12280  | -1.18330 | -3.59020 |
| C | 3.86590  | -2.40040 | -3.04240 |
| H | 1.13640  | -3.48510 | -1.21090 |
| H | 2.22920  | -3.77340 | -3.30850 |
| H | 3.36510  | -4.27240 | -2.04980 |
| H | 2.79380  | -0.08470 | -1.74350 |
| H | 1.59070  | 0.20980  | -3.00190 |
| H | 3.52290  | -1.80030 | -0.25020 |
| H | 3.09240  | -3.42590 | 0.29960  |
| H | 2.00920  | -2.05940 | 0.62580  |
| H | -0.36230 | -1.88740 | -0.76510 |
| H | 0.50500  | 1.00360  | -1.36280 |
| H | -1.06880 | 1.21520  | 0.66910  |
| H | -2.04630 | 1.12460  | -0.79260 |
| H | -1.83000 | -0.31580 | 0.21050  |
| H | 3.82440  | -0.41660 | -3.93490 |
| H | 2.51760  | -1.48620 | -4.45410 |
| H | 4.56280  | -2.08550 | -2.25520 |
| H | 4.47110  | -2.86650 | -3.82690 |

**3b II:**

|   |          |          |          |
|---|----------|----------|----------|
| N | 1.52100  | -1.39590 | -1.55980 |
| C | 1.88920  | -2.83120 | -1.56970 |
| C | 3.41310  | -2.97790 | -1.56370 |
| C | 2.12000  | -0.64430 | -2.66080 |
| C | 1.29100  | -3.59610 | -0.39060 |
| C | 0.15610  | -1.13880 | -1.35500 |
| C | -0.63600 | -0.29780 | -2.04080 |
| C | -2.06610 | -0.03800 | -1.65290 |
| C | 3.63980  | -0.76020 | -2.66940 |
| C | 4.06830  | -2.22280 | -2.71580 |
| H | 1.50860  | -3.28030 | -2.50880 |

|   |          |          |          |
|---|----------|----------|----------|
| H | 3.65640  | -4.04510 | -1.61490 |
| H | 3.79390  | -2.59950 | -0.60420 |
| H | 1.83310  | 0.40500  | -2.54730 |
| H | 1.71270  | -0.99190 | -3.63020 |
| H | 1.51850  | -3.08500 | 0.55220  |
| H | 1.73690  | -4.59470 | -0.35340 |
| H | 0.20890  | -3.72430 | -0.46920 |
| H | -0.26840 | -1.66640 | -0.50340 |
| H | -0.25940 | 0.24220  | -2.90590 |
| H | -2.74890 | -0.25300 | -2.48270 |
| H | -2.36330 | -0.66020 | -0.80300 |
| H | -2.22760 | 1.00940  | -1.37220 |
| H | 4.03840  | -0.28700 | -1.76310 |
| H | 4.03180  | -0.20570 | -3.52870 |
| H | 5.15840  | -2.31400 | -2.66820 |
| H | 3.75030  | -2.66720 | -3.66930 |

**3b III:**

|   |          |          |          |
|---|----------|----------|----------|
| N | 1.30520  | -1.57230 | -1.93730 |
| C | 1.96310  | -2.79010 | -1.44800 |
| C | 2.78080  | -3.41900 | -2.58510 |
| C | 2.19200  | -0.57900 | -2.54320 |
| C | 2.80740  | -2.54850 | -0.18810 |
| C | 0.22600  | -1.06880 | -1.21690 |
| C | -0.43290 | -1.62850 | -0.18550 |
| C | -1.66300 | -1.00830 | 0.42140  |
| C | 2.98080  | -1.18630 | -3.69900 |
| C | 3.74690  | -2.42390 | -3.23160 |
| H | 1.16140  | -3.49290 | -1.19480 |
| H | 2.08340  | -3.78380 | -3.34930 |
| H | 3.32150  | -4.28820 | -2.19380 |
| H | 2.89300  | -0.16270 | -1.79780 |
| H | 1.57500  | 0.25220  | -2.89860 |
| H | 3.67640  | -1.91620 | -0.39600 |
| H | 3.17480  | -3.50070 | 0.20760  |
| H | 2.21350  | -2.05950 | 0.58890  |
| H | -0.12650 | -0.11010 | -1.60290 |
| H | -0.09790 | -2.57140 | 0.24220  |
| H | -1.53210 | -0.81600 | 1.49270  |
| H | -1.90200 | -0.05540 | -0.06190 |
| H | -2.54000 | -1.65900 | 0.32110  |
| H | 3.66440  | -0.43350 | -4.10540 |
| H | 2.28140  | -1.46640 | -4.49710 |
| H | 4.52120  | -2.12460 | -2.51340 |
| H | 4.26680  | -2.89640 | -4.07150 |

**3b IV:**

|   |          |          |          |
|---|----------|----------|----------|
| N | 1.27160  | -1.57350 | -1.96900 |
| C | 1.98120  | -2.76270 | -1.45070 |
| C | 2.99220  | -2.35890 | -0.36690 |
| C | 2.21380  | -0.60430 | -2.52790 |
| C | 1.04020  | -3.86170 | -0.97030 |
| C | 0.21970  | -1.06960 | -1.19780 |
| C | -0.14530 | 0.21090  | -1.01400 |
| C | -1.39190 | 0.59500  | -0.26400 |

|   |          |          |          |
|---|----------|----------|----------|
| C | 3.22710  | -0.11350 | -1.48780 |
| C | 3.97630  | -1.30800 | -0.88950 |
| H | 2.54390  | -3.15630 | -2.31020 |
| H | 3.52920  | -3.24870 | -0.01700 |
| H | 2.43600  | -1.95570 | 0.49220  |
| H | 1.65180  | 0.22190  | -2.97220 |
| H | 2.75020  | -1.10490 | -3.34510 |
| H | 0.24610  | -4.05040 | -1.69990 |
| H | 1.61110  | -4.78540 | -0.83740 |
| H | 0.58150  | -3.61720 | -0.00680 |
| H | -0.40180 | -1.84630 | -0.75500 |
| H | 0.44970  | 1.02520  | -1.42220 |
| H | -2.11280 | 1.11360  | -0.90750 |
| H | -1.89110 | -0.28860 | 0.14640  |
| H | -1.16760 | 1.27060  | 0.56960  |
| H | 2.70010  | 0.42630  | -0.69170 |
| H | 3.92610  | 0.59010  | -1.95320 |
| H | 4.64810  | -0.97990 | -0.08900 |
| H | 4.60650  | -1.76370 | -1.66630 |

### 3c I:

|   |          |          |          |
|---|----------|----------|----------|
| C | -1.93520 | 1.09550  | -3.05590 |
| C | -2.61110 | -0.28820 | -3.09570 |
| C | -1.47900 | -1.26310 | -3.41630 |
| C | -0.19820 | -0.53490 | -3.13690 |
| N | -0.56380 | 0.76450  | -2.63220 |
| C | -0.58220 | -1.71630 | -2.28780 |
| C | -2.62820 | 2.07760  | -2.12410 |
| C | 0.39840  | 1.74280  | -2.46560 |
| C | 1.73040  | 1.55980  | -2.39960 |
| C | 2.69750  | 2.68800  | -2.16510 |
| H | -1.91670 | 1.51360  | -4.07860 |
| H | -3.40240 | -0.31820 | -3.85000 |
| H | -3.06540 | -0.51050 | -2.12140 |
| H | -1.56010 | -1.89840 | -4.29160 |
| H | 0.65620  | -0.58080 | -3.80960 |
| H | -0.03560 | -2.64500 | -2.42580 |
| H | -0.89760 | -1.49910 | -1.27070 |
| H | -2.16490 | 3.06820  | -2.14460 |
| H | -2.60180 | 1.70000  | -1.09600 |
| H | -3.67350 | 2.19600  | -2.42800 |
| H | -0.00670 | 2.74900  | -2.35410 |
| H | 2.14220  | 0.55550  | -2.48460 |
| H | 3.26580  | 2.55290  | -1.23690 |
| H | 3.43140  | 2.77110  | -2.97520 |
| H | 2.17200  | 3.64600  | -2.09490 |

### 3c II:

|   |          |          |          |
|---|----------|----------|----------|
| C | -1.92710 | 1.10380  | -3.05450 |
| C | -2.51420 | -0.19760 | -3.65290 |
| C | -1.32680 | -1.11760 | -3.90610 |
| C | -0.13130 | -0.48200 | -3.26470 |
| N | -0.56320 | 0.75040  | -2.63050 |
| C | -0.68410 | -1.75910 | -2.69810 |
| C | -2.77080 | 1.64380  | -1.90450 |
| C | 0.38970  | 1.74860  | -2.46870 |
| C | 0.20250  | 3.08000  | -2.51140 |



|   |          |          |          |
|---|----------|----------|----------|
| C | 1.31470  | 4.06310  | -2.26610 |
| H | -1.85900 | 1.86930  | -3.84760 |
| H | -3.05340 | 0.01830  | -4.57920 |
| H | -3.22910 | -0.65090 | -2.95530 |
| H | -1.23540 | -1.61460 | -4.86600 |
| H | 0.84250  | -0.46710 | -3.74580 |
| H | -1.20830 | -1.68340 | -1.74800 |
| H | -0.11980 | -2.67410 | -2.85240 |
| H | -2.86620 | 0.87790  | -1.12740 |
| H | -3.77290 | 1.89880  | -2.26510 |
| H | -2.33020 | 2.53650  | -1.45410 |
| H | 1.38840  | 1.35880  | -2.26370 |
| H | -0.78360 | 3.49320  | -2.71120 |
| H | 1.12220  | 4.68680  | -1.38480 |
| H | 2.26710  | 3.54740  | -2.10580 |
| H | 1.44290  | 4.74550  | -3.11430 |

**Conformational Analysis of 3a, 3 and 3b in DMSO:**

|               | <b>Total Free Energy (au)</b> | <b>Relative Energy (kcal/mol)</b> | <b>Population (%)</b> | <b>Pyramidalization <math>\Delta</math> (Å)</b> |
|---------------|-------------------------------|-----------------------------------|-----------------------|-------------------------------------------------|
| <b>3a I</b>   | -328.983517                   | 0.00                              | 67.7                  | 0.425                                           |
| <b>3a II</b>  | -328.98282                    | 0.44                              | 32.3                  | 0.433                                           |
| <b>3 I</b>    | -368.278907                   | 0.00                              | 35.7                  | 0.217                                           |
| <b>3 II</b>   | -368.278887                   | 0.01                              | 34.9                  | 0.242                                           |
| <b>3 III</b>  | -368.278129                   | 0.49                              | 15.6                  | -0.292                                          |
| <b>3 IV</b>   | -368.277689                   | 0.76                              | 9.8                   | 0.268                                           |
| <b>3 V</b>    | -368.276681                   | 1.40                              | 3.4                   | 0.280                                           |
| <b>3b I</b>   | -407.55068                    | 0.00                              | 54.7                  | -0.335                                          |
| <b>3b II</b>  | -407.549798                   | 0.55                              | 21.5                  | 0.370                                           |
| <b>3b III</b> | -407.549297                   | 0.87                              | 12.6                  | -0.280                                          |
| <b>3b IV</b>  | -407.548407                   | 1.43                              | 4.9                   | -0.334                                          |

**3a I:**

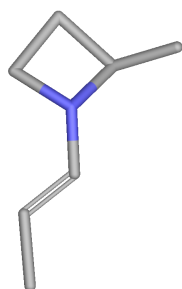

**3a II:**

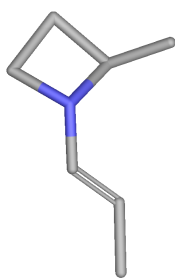

**3 I:**

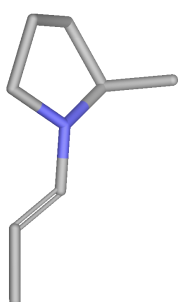

**3 II:**

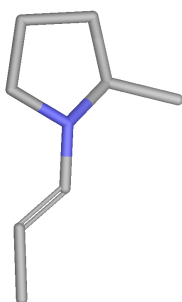

**3 III:**

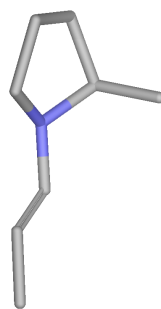

**3 IV:**

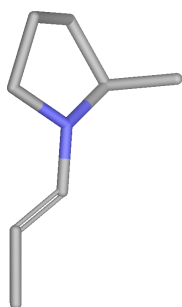

**3 V:**

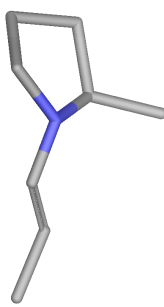

**3b I:**

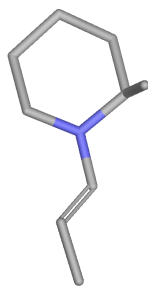

**3b II:**

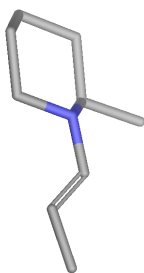

**3b III:**

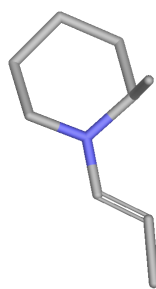

**3b IV:**

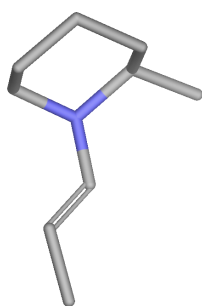

Distances and angles found in the lowest energy structures of **3a**, **3** and **3b**:



DMSO:

|               | d(N–C(1)) | d(C(1)–C(2)) | $\alpha^1$ | $\alpha^2$ | $\alpha^3$ | $\beta$ |
|---------------|-----------|--------------|------------|------------|------------|---------|
| <b>3a I</b>   | 1.40      | 1.34         | 91.2       | 120.9      | 121.8      | 125.6   |
| <b>3a II</b>  | 1.40      | 1.34         | 91.1       | 121.8      | 120.1      | 126.1   |
| <b>3 I</b>    | 1.38      | 1.35         | 112.2      | 120.5      | 120.5      | 126.5   |
| <b>3 II</b>   | 1.38      | 1.35         | 111.2      | 120.7      | 119.6      | 126.6   |
| <b>3 III</b>  | 1.39      | 1.35         | 109.4      | 119.1      | 119.4      | 126.6   |
| <b>3 IV</b>   | 1.39      | 1.35         | 110.9      | 120.3      | 118.5      | 127.5   |
| <b>3 V</b>    | 1.39      | 1.35         | 110.7      | 119.5      | 118.8      | 127.6   |
| <b>3b I</b>   | 1.40      | 1.34         | 115.0      | 113.3      | 116.1      | 128.1   |
| <b>3b II</b>  | 1.41      | 1.34         | 112.7      | 114.3      | 114.2      | 127.0   |
| <b>3b III</b> | 1.39      | 1.35         | 115.1      | 118.2      | 115.6      | 128.6   |
| <b>3b IV</b>  | 1.40      | 1.34         | 110.8      | 116.8      | 116.9      | 128.5   |

## Coordinates of the Calculated Lowest Energy Structures:

### 3a I:

|   |          |          |          |
|---|----------|----------|----------|
| N | -0.13900 | -0.08220 | 0.29790  |
| C | -0.42020 | 1.21570  | -0.37050 |
| C | -1.70540 | 0.58430  | -0.95000 |
| C | -1.08210 | -0.78170 | -0.59590 |
| C | -0.52790 | 2.41750  | 0.54380  |
| C | 1.17240  | -0.52630 | 0.47730  |
| C | 1.60660  | -1.78110 | 0.28180  |
| C | 3.01460  | -2.22590 | 0.56860  |
| H | 0.31230  | 1.40300  | -1.17110 |
| H | -1.91840 | 0.77640  | -2.00200 |
| H | -2.58440 | 0.81520  | -0.34110 |
| H | -0.56450 | -1.24080 | -1.45160 |
| H | -1.71250 | -1.53380 | -0.11280 |
| H | -0.82680 | 3.30210  | -0.02840 |
| H | -1.27440 | 2.23330  | 1.32330  |
| H | 0.43260  | 2.63390  | 1.02470  |
| H | 1.85330  | 0.24750  | 0.84080  |
| H | 0.90550  | -2.53740 | -0.07370 |
| H | 3.04520  | -2.99090 | 1.35390  |
| H | 3.48570  | -2.66480 | -0.31830 |
| H | 3.63310  | -1.38440 | 0.89710  |

### 3a II:

|   |          |          |          |
|---|----------|----------|----------|
| N | -0.12440 | -0.05510 | 0.28750  |
| C | -0.42220 | 1.20490  | -0.43210 |
| C | -1.69290 | 0.53650  | -0.99770 |
| C | -1.05740 | -0.80750 | -0.58640 |
| C | -0.56890 | 2.44740  | 0.42430  |
| C | 1.18590  | -0.50800 | 0.47040  |
| C | 2.29720  | 0.24160  | 0.40610  |
| C | 3.67480  | -0.29230 | 0.68970  |
| H | 0.32050  | 1.37110  | -1.23040 |
| H | -1.89870 | 0.68380  | -2.05840 |
| H | -2.58040 | 0.77950  | -0.40620 |
| H | -0.53750 | -1.29410 | -1.42300 |
| H | -1.68360 | -1.54010 | -0.06980 |
| H | -1.31020 | 2.27540  | 1.21200  |
| H | 0.38040  | 2.72470  | 0.89440  |
| H | -0.90260 | 3.28970  | -0.19150 |
| H | 1.24860  | -1.57130 | 0.71520  |
| H | 2.21740  | 1.30110  | 0.16180  |
| H | 3.64500  | -1.36650 | 0.89760  |
| H | 4.34930  | -0.13190 | -0.15920 |
| H | 4.13140  | 0.20410  | 1.55450  |

**3 I:**

|   |          |          |          |
|---|----------|----------|----------|
| N | -0.20250 | 2.43350  | -0.73080 |
| C | -1.66890 | 2.28020  | -0.69090 |
| C | -1.91990 | 1.06350  | -1.60030 |
| C | 0.43960  | 1.38670  | -1.51380 |
| C | -2.16800 | 2.07660  | 0.73810  |
| C | 0.37280  | 3.68190  | -0.62440 |
| C | 1.61800  | 4.02650  | -1.01100 |
| C | 2.18320  | 5.40690  | -0.80940 |
| C | -0.60660 | 0.27420  | -1.53140 |
| H | -2.14580 | 3.17560  | -1.11140 |
| H | -2.09430 | 1.39840  | -2.62880 |
| H | -2.79190 | 0.48570  | -1.28100 |
| H | 0.66530  | 1.74200  | -2.53510 |
| H | 1.38740  | 1.08020  | -1.05570 |
| H | -1.76690 | 1.14530  | 1.15470  |
| H | -1.84580 | 2.90350  | 1.38010  |
| H | -3.26230 | 2.03000  | 0.75930  |
| H | -0.27380 | 4.42930  | -0.15810 |
| H | 2.26630  | 3.28340  | -1.47290 |
| H | 1.44230  | 6.07000  | -0.35060 |
| H | 3.06710  | 5.39820  | -0.15990 |
| H | 2.49470  | 5.86250  | -1.75690 |
| H | -0.55130 | -0.30600 | -0.60390 |
| H | -0.47300 | -0.41330 | -2.36950 |

**3 II:**

|   |          |          |          |
|---|----------|----------|----------|
| N | -0.17190 | 2.37300  | -0.74200 |
| C | -1.62090 | 2.13470  | -0.65310 |
| C | -1.69970 | 0.62670  | -0.88920 |
| C | 0.47120  | 1.40440  | -1.63130 |
| C | -2.21410 | 2.57480  | 0.67810  |
| C | 0.34080  | 3.65110  | -0.63940 |
| C | 1.55360  | 4.06740  | -1.05700 |
| C | 2.04760  | 5.47420  | -0.84920 |
| C | -0.63150 | 0.38040  | -1.95990 |
| H | -2.14560 | 2.65510  | -1.47500 |
| H | -1.44140 | 0.10560  | 0.04170  |
| H | -2.69980 | 0.30980  | -1.19570 |
| H | 0.84330  | 1.90000  | -2.54030 |
| H | 1.33650  | 0.94730  | -1.13510 |
| H | -1.67750 | 2.09340  | 1.50380  |
| H | -2.16880 | 3.65970  | 0.81630  |
| H | -3.26750 | 2.27870  | 0.72450  |
| H | -0.32130 | 4.36060  | -0.14030 |
| H | 2.23180  | 3.36720  | -1.54180 |
| H | 1.28130  | 6.09170  | -0.36930 |
| H | 2.94280  | 5.50530  | -0.21590 |
| H | 2.31700  | 5.95620  | -1.79640 |
| H | -1.04610 | 0.58900  | -2.95140 |
| H | -0.25820 | -0.64620 | -1.96500 |

**3 III:**

|   |          |          |          |
|---|----------|----------|----------|
| N | -0.34450 | 2.55680  | -1.30280 |
| C | -1.69060 | 2.25020  | -0.79500 |
| C | -1.92100 | 0.86010  | -1.39250 |
| C | 0.47490  | 1.34580  | -1.26990 |
| C | -1.76800 | 2.25300  | 0.73470  |
| C | 0.23200  | 3.77820  | -0.98820 |
| C | 1.54700  | 4.03600  | -0.86250 |
| C | 2.08890  | 5.41620  | -0.60740 |
| C | -0.54070 | 0.18180  | -1.27520 |
| H | -2.39490 | 2.98770  | -1.19800 |
| H | -2.21030 | 0.96100  | -2.44330 |
| H | -2.71000 | 0.30950  | -0.87290 |
| H | 1.15280  | 1.32790  | -2.13120 |
| H | 1.10340  | 1.32230  | -0.36500 |
| H | -1.08950 | 1.50790  | 1.16700  |
| H | -2.78530 | 2.01890  | 1.06450  |
| H | -1.49470 | 3.23370  | 1.13710  |
| H | -0.49230 | 4.58950  | -0.88230 |
| H | 2.26980  | 3.22910  | -0.97080 |
| H | 2.72590  | 5.76450  | -1.43000 |
| H | 1.27650  | 6.14040  | -0.48710 |
| H | 2.70240  | 5.44760  | 0.30090  |
| H | -0.46630 | -0.38500 | -0.34310 |
| H | -0.35670 | -0.51870 | -2.09280 |

**3 IV:**

|   |          |          |          |
|---|----------|----------|----------|
| N | 0.09270  | 2.15090  | -0.70380 |
| C | -1.33240 | 2.39940  | -0.97350 |
| C | -1.82510 | 1.08480  | -1.61340 |
| C | 0.50820  | 0.84930  | -1.23910 |
| C | -2.08620 | 2.76090  | 0.30540  |
| C | 1.00140  | 3.19650  | -0.72710 |
| C | 0.73230  | 4.51640  | -0.74530 |
| C | 1.80970  | 5.56700  | -0.71050 |
| C | -0.78480 | 0.04340  | -1.18190 |
| H | -1.42660 | 3.22750  | -1.69220 |
| H | -2.84310 | 0.83660  | -1.29970 |
| H | -1.82390 | 1.17560  | -2.70500 |
| H | 0.86320  | 0.93220  | -2.28020 |
| H | 1.31730  | 0.42620  | -0.63490 |
| H | -2.09900 | 1.90430  | 0.98940  |
| H | -1.61060 | 3.60270  | 0.81840  |
| H | -3.12070 | 3.03630  | 0.07270  |
| H | 2.04220  | 2.86500  | -0.69060 |
| H | -0.29850 | 4.86730  | -0.76330 |
| H | 1.74250  | 6.19390  | 0.18730  |
| H | 2.80440  | 5.10960  | -0.72220 |
| H | 1.74380  | 6.24340  | -1.57100 |
| H | -0.76380 | -0.83640 | -1.82930 |
| H | -0.97190 | -0.28910 | -0.15470 |



**3 V:**

|   |          |          |          |
|---|----------|----------|----------|
| N | 0.10560  | 2.11060  | -0.61030 |
| C | -1.34060 | 2.34410  | -0.75160 |
| C | -1.88670 | 0.99470  | -1.23840 |
| C | 0.47800  | 0.79440  | -1.16530 |
| C | -1.99540 | 2.82710  | 0.53860  |
| C | 0.98570  | 3.17140  | -0.76030 |
| C | 0.69110  | 4.48560  | -0.79900 |
| C | 1.74930  | 5.54820  | -0.93030 |
| C | -0.72050 | 0.40590  | -2.03280 |
| H | -1.49600 | 3.09910  | -1.54100 |
| H | -2.80190 | 1.11980  | -1.82270 |
| H | -2.11780 | 0.35530  | -0.37650 |
| H | 1.41420  | 0.86280  | -1.72630 |
| H | 0.61680  | 0.06400  | -0.35770 |
| H | -1.86430 | 2.07720  | 1.32630  |
| H | -1.56710 | 3.77240  | 0.88390  |
| H | -3.06900 | 2.97640  | 0.37720  |
| H | 2.03080  | 2.86240  | -0.82940 |
| H | -0.34000 | 4.82370  | -0.72020 |
| H | 2.74460  | 5.10160  | -1.02310 |
| H | 1.58490  | 6.17930  | -1.81200 |
| H | 1.76750  | 6.22120  | -0.06400 |
| H | -0.79730 | -0.67350 | -2.18620 |
| H | -0.64760 | 0.89020  | -3.01360 |

**3b I:**

|   |          |          |          |
|---|----------|----------|----------|
| N | 1.42330  | -1.14490 | -1.65820 |
| C | 1.76130  | -2.58460 | -1.57430 |
| C | 3.22740  | -2.79430 | -1.96420 |
| C | 2.29290  | -0.25980 | -0.88440 |
| C | 1.43040  | -3.19080 | -0.20350 |
| C | 0.04930  | -0.89300 | -1.56790 |
| C | -0.56800 | 0.12550  | -0.94680 |
| C | -2.05760 | 0.32880  | -1.00840 |
| C | 3.76180  | -0.46500 | -1.24730 |
| C | 4.17060  | -1.93160 | -1.12470 |
| H | 1.13450  | -3.08460 | -2.32350 |
| H | 3.34860  | -2.53000 | -3.02250 |
| H | 3.47180  | -3.85760 | -1.86310 |
| H | 2.14160  | -0.40630 | 0.20040  |
| H | 2.00640  | 0.77300  | -1.10520 |
| H | 2.01870  | -2.74110 | 0.60280  |
| H | 1.63720  | -4.26600 | -0.20950 |
| H | 0.37140  | -3.04770 | 0.03400  |
| H | -0.55240 | -1.62960 | -2.10660 |
| H | 0.00380  | 0.85470  | -0.37740 |
| H | -2.49860 | 0.36190  | -0.00570 |
| H | -2.32130 | 1.27250  | -1.50090 |
| H | -2.54140 | -0.48170 | -1.56170 |
| H | 4.37630  | 0.16960  | -0.60020 |
| H | 3.92110  | -0.12900 | -2.28030 |
| H | 4.13370  | -2.24030 | -0.07220 |
| H | 5.20540  | -2.07040 | -1.45410 |

**3b II:**

|   |          |          |          |
|---|----------|----------|----------|
| N | 1.47860  | -1.18570 | -0.89080 |
| C | 1.83380  | -2.55040 | -1.35730 |
| C | 3.32400  | -2.81060 | -1.12240 |
| C | 2.29480  | -0.14460 | -1.51860 |
| C | 1.00380  | -3.63590 | -0.67480 |
| C | 0.09800  | -0.91500 | -0.89070 |
| C | -0.52850 | 0.17050  | -1.37550 |
| C | -2.01170 | 0.37950  | -1.22830 |
| C | 3.78480  | -0.37040 | -1.28880 |
| C | 4.20320  | -1.75190 | -1.78030 |
| H | 1.64900  | -2.60120 | -2.44880 |
| H | 3.56360  | -3.80630 | -1.51220 |
| H | 3.50820  | -2.82970 | -0.03820 |
| H | 1.99980  | 0.82010  | -1.09510 |
| H | 2.08750  | -0.09960 | -2.60500 |
| H | 1.03530  | -3.51650 | 0.41500  |
| H | 1.42970  | -4.61320 | -0.92290 |
| H | -0.04040 | -3.64250 | -0.99660 |
| H | -0.50040 | -1.67550 | -0.39240 |
| H | 0.02530  | 0.95280  | -1.88910 |
| H | -2.49100 | 0.52760  | -2.20270 |
| H | -2.48530 | -0.48170 | -0.74720 |
| H | -2.24040 | 1.26700  | -0.62640 |
| H | 4.00080  | -0.27820 | -0.21640 |
| H | 4.34340  | 0.41860  | -1.80320 |
| H | 5.26070  | -1.94030 | -1.56820 |
| H | 4.08050  | -1.80470 | -2.87110 |

**3b III:**

|   |          |          |          |
|---|----------|----------|----------|
| N | 1.56410  | -0.80830 | -1.29180 |
| C | 1.61220  | -2.22210 | -1.69320 |
| C | 2.96640  | -2.51690 | -2.35300 |
| C | 2.66350  | -0.36930 | -0.42740 |
| C | 1.31060  | -3.18480 | -0.53520 |
| C | 0.32000  | -0.24270 | -1.01960 |
| C | -0.90310 | -0.75820 | -1.24140 |
| C | -2.16570 | 0.02360  | -0.99320 |
| C | 4.01350  | -0.62860 | -1.08780 |
| C | 4.14770  | -2.10160 | -1.47390 |
| H | 0.83890  | -2.35240 | -2.45880 |
| H | 3.01670  | -1.96620 | -3.30080 |
| H | 3.01490  | -3.58480 | -2.59390 |
| H | 2.62860  | -0.88170 | 0.55020  |
| H | 2.53200  | 0.69930  | -0.23120 |
| H | 2.09300  | -3.16080 | 0.23000  |
| H | 1.24280  | -4.21050 | -0.91200 |
| H | 0.36060  | -2.93310 | -0.05600 |
| H | 0.39610  | 0.76790  | -0.61140 |
| H | -1.02120 | -1.77060 | -1.62380 |
| H | -2.82220 | -0.48590 | -0.27760 |
| H | -1.94070 | 1.01720  | -0.59160 |
| H | -2.74880 | 0.16100  | -1.91210 |
| H | 4.81250  | -0.32910 | -0.40140 |
| H | 4.09760  | -0.00330 | -1.98640 |
| H | 4.17870  | -2.71600 | -0.56480 |
| H | 5.09070  | -2.27820 | -2.00180 |

**3b IV:**

|   |          |          |          |
|---|----------|----------|----------|
| N | 1.34890  | -1.46540 | -2.03610 |
| C | 1.99330  | -2.72880 | -1.60550 |
| C | 2.89230  | -2.48910 | -0.38340 |
| C | 2.35730  | -0.45370 | -2.36500 |
| C | 0.99750  | -3.85810 | -1.36450 |
| C | 0.23870  | -1.03780 | -1.29640 |
| C | -0.12410 | 0.21770  | -0.98110 |
| C | -1.42500 | 0.53170  | -0.29170 |
| C | 3.26520  | -0.12590 | -1.17450 |
| C | 3.93630  | -1.40460 | -0.66460 |
| H | 2.63680  | -3.02270 | -2.44770 |
| H | 3.38080  | -3.42920 | -0.10070 |
| H | 2.25640  | -2.18660 | 0.46190  |
| H | 1.85440  | 0.43830  | -2.74960 |
| H | 2.96880  | -0.85740 | -3.18290 |
| H | 0.27530  | -3.93420 | -2.18430 |
| H | 1.54410  | -4.80370 | -1.29960 |
| H | 0.44920  | -3.72950 | -0.42540 |
| H | -0.42960 | -1.84960 | -1.01150 |
| H | 0.51320  | 1.06420  | -1.23000 |
| H | -2.08490 | 1.14210  | -0.92020 |
| H | -1.96580 | -0.38520 | -0.03640 |
| H | -1.26290 | 1.09490  | 0.63470  |
| H | 2.66820  | 0.32250  | -0.37130 |
| H | 4.01540  | 0.61350  | -1.47520 |
| H | 4.52630  | -1.19740 | 0.23480  |
| H | 4.63720  | -1.77240 | -1.42700 |

## Conformational Analysis of Pyrrolidinylamides **4a**, **4**, and **4b** in CHCl<sub>3</sub>

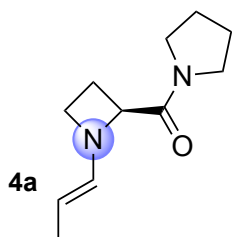

$$\Delta = 0.40 \text{ \AA}$$

>100 : 1

*endo* : *exo*

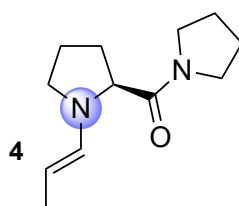

$$\Delta = 0.13 \text{ \AA}$$

71 : 29

*endo* : *exo*

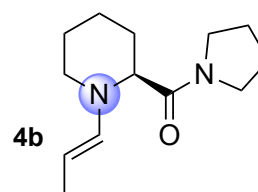

$$\Delta = 0.31 \text{ \AA}$$

52 : 48

*endo* : *exo*

Note, the N-pyramidalization and *endo/exo* ratio of pyrrolidinylamides **4a**, **4** and **4b** were averaged over all conformations in energy minima. Several of them differ in the  $\Psi$  dihedral angle ( $N^1-C^2-C^{Amide}-N^{Amide}$ ) and are likely not relevant for the conformational space of the peptidic catalysts **2a**, **2**, and **2b** since NMR spectroscopic analyses of peptide **2** had revealed a defined conformation around the DPro-Pro moiety.

|                | <b>Total Free Energy (au)</b> | <b>Relative Energy (kcal/mol)</b> | <b>Population (%)</b> | <b>Pyramidalization <math>\Delta</math> (Å)</b> |
|----------------|-------------------------------|-----------------------------------|-----------------------|-------------------------------------------------|
| <b>4a I</b>    | -614.229328                   | 0.00                              | 21.9                  | 0.366                                           |
| <b>4a II</b>   | -614.229324                   | 0.00                              | 21.8                  | 0.411                                           |
| <b>4a III</b>  | -614.229031                   | 0.19                              | 16.0                  | 0.408                                           |
| <b>4a IV</b>   | -614.228726                   | 0.38                              | 11.6                  | 0.427                                           |
| <b>4a V</b>    | -614.228580                   | 0.47                              | 9.9                   | 0.347                                           |
| <b>4a VI</b>   | -614.228554                   | 0.49                              | 9.6                   | 0.420                                           |
| <b>4a VII</b>  | -614.228517                   | 0.51                              | 9.3                   | 0.404                                           |
| <hr/>          |                               |                                   |                       |                                                 |
| <b>4 I</b>     | -653.527484                   | 0.00                              | 21.9                  | 0.153                                           |
| <b>4 II</b>    | -653.526790                   | 0.44                              | 13.2                  | 0.037                                           |
| <b>4 III</b>   | -653.526519                   | 0.61                              | 9.9                   | 0.133                                           |
| <b>4 IV</b>    | -653.526396                   | 0.68                              | 8.7                   | -0.120                                          |
| <b>4 V</b>     | -653.526354                   | 0.71                              | 8.3                   | 0.079                                           |
| <b>4 VI</b>    | -653.526071                   | 0.89                              | 6.2                   | 0.318                                           |
| <b>4 VII</b>   | -653.526057                   | 0.90                              | 6.1                   | -0.020                                          |
| <b>4 VIII</b>  | -653.526005                   | 0.93                              | 5.7                   | 0.151                                           |
| <b>4 IX</b>    | -653.525894                   | 1.00                              | 5.1                   | -0.191                                          |
| <b>4 X</b>     | -653.525874                   | 1.01                              | 5.0                   | -0.132                                          |
| <b>4 XI</b>    | -653.525756                   | 1.08                              | 4.4                   | -0.189                                          |
| <hr/>          |                               |                                   |                       |                                                 |
| <b>4b I</b>    | -692.798007                   | 0.00                              | 19.4                  | -0.259                                          |
| <b>4b II</b>   | -692.797860                   | 0.09                              | 16.6                  | 0.357                                           |
| <b>4b III</b>  | -692.797786                   | 0.14                              | 15.4                  | -0.262                                          |
| <b>4b IV</b>   | -692.797603                   | 0.25                              | 12.7                  | 0.285                                           |
| <b>4b V</b>    | -692.797294                   | 0.45                              | 9.1                   | 0.343                                           |
| <b>4b VI</b>   | -692.797250                   | 0.48                              | 8.7                   | -0.323                                          |
| <b>4b VII</b>  | -692.796766                   | 0.78                              | 5.2                   | 0.344                                           |
| <b>4b VIII</b> | -692.796651                   | 0.85                              | 4.6                   | 0.381                                           |
| <b>4b IX</b>   | -692.796579                   | 0.90                              | 4.3                   | -0.329                                          |
| <b>4b X</b>    | -692.79647                    | 0.96                              | 3.8                   | 0.363                                           |

4a I:

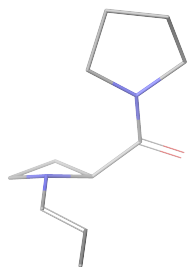

4a II:

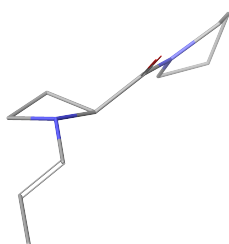

4a III:

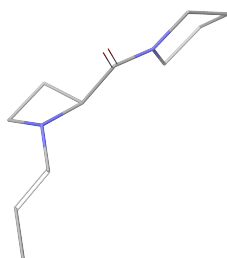

4a IV:

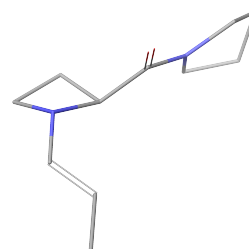

4a V:

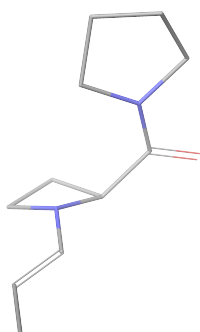

4a VI:

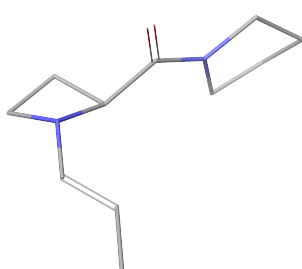

4a VII:

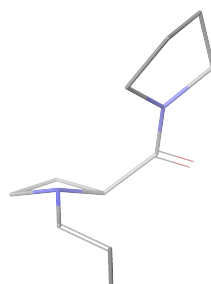

4 I:

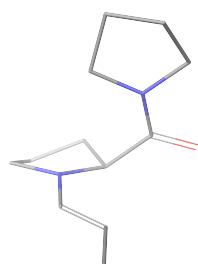

4 II:

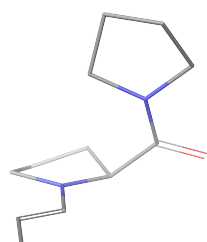

4 III:

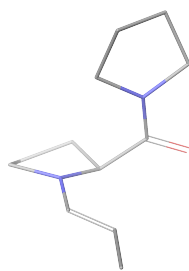

4 IV:

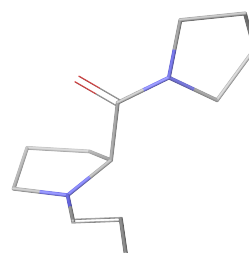

4 V:

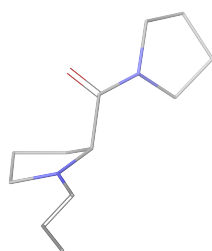

4 VI:

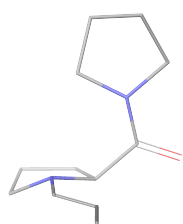

4 VII:

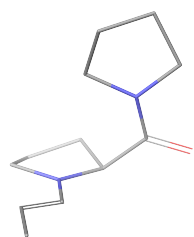

4 VIII:

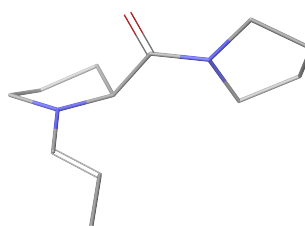

4 IX:

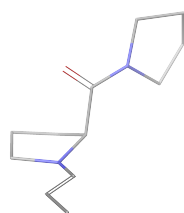

4 X:

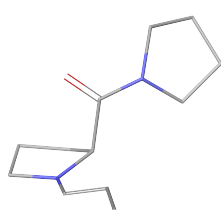

4 XI:

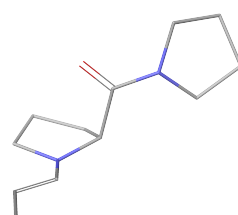

**4b I:**

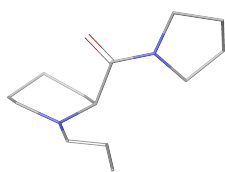

**4b II:**

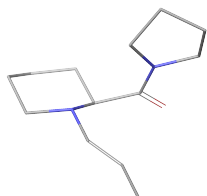

**4b III:**

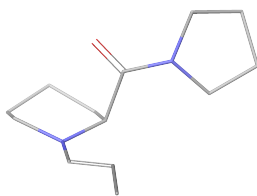

**4b IV:**

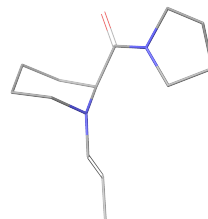

**4b V:**

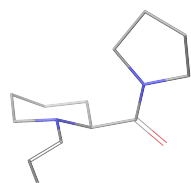

**4b VI:**

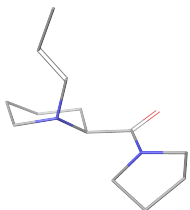

**4b VII:**

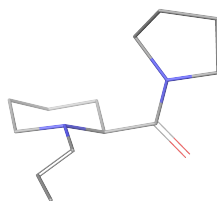

**4b VIII:**

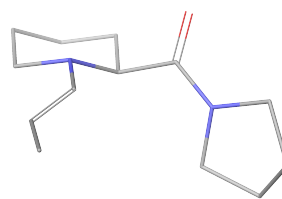

**4b IX:**

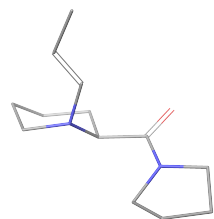

**4b X:**

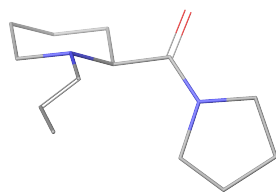

## Coordinates of the Calculated Lowest Energy Structures:

### 4a I:

|   |          |          |          |
|---|----------|----------|----------|
| C | 1.26290  | -0.73900 | -0.62710 |
| N | 1.45060  | -1.57760 | 0.56870  |
| C | 0.31360  | -0.96550 | 1.24850  |
| C | 2.67310  | -1.80550 | 1.18710  |
| C | 2.86020  | -1.90820 | 2.51190  |
| C | 4.18180  | -2.25310 | 3.13970  |
| C | -0.65250 | -1.81630 | 2.06350  |
| N | -0.80080 | -3.12410 | 1.79680  |
| O | -1.31620 | -1.25640 | 2.95290  |
| C | -1.73300 | -3.92010 | 2.61290  |
| C | -1.43140 | -5.35910 | 2.19280  |
| C | -1.01990 | -5.20710 | 0.72600  |
| C | -0.16780 | -3.93560 | 0.73680  |
| C | -0.16580 | -0.42880 | -0.12560 |
| H | 1.36460  | -1.27020 | -1.57860 |
| H | 1.90930  | 0.14960  | -0.63080 |
| H | 0.62360  | -0.14640 | 1.91630  |
| H | 3.49850  | -1.95390 | 0.48810  |
| H | 2.01330  | -1.75730 | 3.18270  |
| H | 4.12840  | -3.19450 | 3.69940  |
| H | 4.96230  | -2.36040 | 2.37970  |
| H | 4.50440  | -1.48080 | 3.84700  |
| H | -2.76590 | -3.63130 | 2.37910  |
| H | -1.56120 | -3.72360 | 3.67410  |
| H | -0.59330 | -5.75270 | 2.77940  |
| H | -2.28890 | -6.02010 | 2.33650  |
| H | -0.46720 | -6.06490 | 0.33510  |
| H | -1.90690 | -5.05750 | 0.09930  |
| H | 0.87380  | -4.15210 | 0.99920  |
| H | -0.17450 | -3.41260 | -0.22030 |
| H | -0.92430 | -1.06900 | -0.58300 |
| H | -0.49070 | 0.61040  | -0.14930 |



**4a II:**

|   |          |          |          |
|---|----------|----------|----------|
| C | 1.44730  | -0.43890 | 0.35110  |
| N | 2.05830  | -1.65770 | 0.90250  |
| C | 0.75280  | -2.16550 | 1.33330  |
| C | 3.14560  | -1.62030 | 1.77580  |
| C | 4.00020  | -0.59500 | 1.90260  |
| C | 5.20680  | -0.62780 | 2.79850  |
| C | 0.54040  | -3.66040 | 1.14110  |
| N | -0.72950 | -4.09090 | 1.25130  |
| O | 1.48400  | -4.42800 | 0.92160  |
| C | -1.90820 | -3.26480 | 1.55710  |
| C | -2.94590 | -4.30410 | 1.98730  |
| C | -2.59380 | -5.51540 | 1.11630  |
| C | -1.06320 | -5.51620 | 1.12050  |
| C | 0.08300  | -1.15720 | 0.36440  |
| H | 1.85100  | -0.11530 | -0.61240 |
| H | 1.48210  | 0.39950  | 1.06380  |
| H | 0.53310  | -1.91120 | 2.38510  |
| H | 3.28000  | -2.54310 | 2.34170  |
| H | 3.84280  | 0.30510  | 1.30780  |
| H | 6.13750  | -0.53540 | 2.22610  |
| H | 5.19330  | 0.19850  | 3.51850  |
| H | 5.25240  | -1.56500 | 3.36220  |
| H | -2.24100 | -2.72520 | 0.66100  |
| H | -1.68650 | -2.53570 | 2.34160  |
| H | -3.96870 | -3.94830 | 1.84520  |
| H | -2.81030 | -4.54710 | 3.04710  |
| H | -2.96450 | -5.36270 | 0.09660  |
| H | -3.00950 | -6.45240 | 1.49260  |
| H | -0.65440 | -6.07030 | 1.97490  |
| H | -0.62030 | -5.92580 | 0.20910  |
| H | -0.16770 | -1.61170 | -0.59740 |
| H | -0.76700 | -0.59520 | 0.75140  |

**4a III:**

|   |          |          |          |
|---|----------|----------|----------|
| C | 1.34880  | -0.18060 | 0.53080  |
| N | 1.97450  | -1.46980 | 0.85800  |
| C | 0.67950  | -2.07250 | 1.17500  |
| C | 3.05130  | -1.58510 | 1.73520  |
| C | 3.89450  | -0.59680 | 2.06710  |
| C | 5.08600  | -0.79050 | 2.96200  |
| C | 0.46610  | -3.49390 | 0.66820  |
| N | -0.68770 | -4.07370 | 1.04960  |
| O | 1.28720  | -4.06730 | -0.05400 |
| C | -1.72170 | -3.47240 | 1.90700  |
| C | -2.90850 | -4.42210 | 1.72630  |
| C | -2.23080 | -5.78050 | 1.52120  |
| C | -1.03090 | -5.43990 | 0.63280  |
| C | -0.00470 | -0.91040 | 0.40340  |
| H | 1.75130  | 0.31580  | -0.35660 |
| H | 1.36760  | 0.51720  | 1.38210  |
| H | 0.45050  | -2.02300 | 2.25210  |
| H | 3.18870  | -2.59580 | 2.12290  |
| H | 3.73700  | 0.39860  | 1.65170  |
| H | 6.02510  | -0.58090 | 2.43690  |
| H | 5.04940  | -0.12000 | 3.82800  |
| H | 5.13320  | -1.81840 | 3.33440  |
| H | -1.94890 | -2.45120 | 1.59470  |
| H | -1.38900 | -3.45260 | 2.95220  |
| H | -3.47290 | -4.14300 | 0.83060  |
| H | -3.58850 | -4.39890 | 2.58050  |
| H | -2.88680 | -6.52430 | 1.06530  |
| H | -1.88350 | -6.17430 | 2.48300  |
| H | -0.17350 | -6.10330 | 0.77490  |
| H | -1.29390 | -5.44800 | -0.43310 |
| H | -0.24510 | -1.18460 | -0.62650 |
| H | -0.86460 | -0.44150 | 0.88290  |

**4a IV:**

|   |          |          |          |
|---|----------|----------|----------|
| C | 0.84310  | 0.24860  | 0.57380  |
| N | 1.76040  | -0.90370 | 0.71170  |
| C | 0.67830  | -1.75810 | 1.19180  |
| C | 2.95570  | -0.79000 | 1.42490  |
| C | 3.44020  | -1.70120 | 2.27980  |
| C | 4.76000  | -1.56150 | 2.98460  |
| C | 0.64700  | -3.18010 | 0.64600  |
| N | -0.42320 | -3.91240 | 1.01520  |
| O | 1.53490  | -3.62910 | -0.08510 |
| C | -1.53700 | -3.46600 | 1.86610  |
| C | -2.23410 | -4.77970 | 2.22620  |
| C | -2.03300 | -5.62730 | 0.96500  |
| C | -0.60000 | -5.29240 | 0.54050  |
| C | -0.34580 | -0.73320 | 0.64130  |
| H | 0.97290  | 0.82780  | -0.34410 |
| H | 0.87580  | 0.91860  | 1.44410  |
| H | 0.65770  | -1.79290 | 2.29560  |
| H | 3.50850  | 0.12560  | 1.20750  |
| H | 2.87770  | -2.61820 | 2.45440  |
| H | 5.45750  | -2.35690 | 2.69690  |
| H | 4.64170  | -1.62050 | 4.07250  |
| H | 5.22980  | -0.60180 | 2.74970  |
| H | -2.20960 | -2.80620 | 1.30290  |
| H | -1.17540 | -2.92480 | 2.74500  |
| H | -1.72880 | -5.24480 | 3.08000  |
| H | -3.28390 | -4.63060 | 2.48880  |
| H | -2.17520 | -6.69620 | 1.13700  |
| H | -2.73650 | -5.31120 | 0.18690  |
| H | 0.13670  | -5.94680 | 1.02300  |
| H | -0.43980 | -5.34340 | -0.53960 |
| H | -0.72530 | -1.01350 | -0.34460 |
| H | -1.17020 | -0.46200 | 1.30090  |

**4a V:**

|   |          |          |          |
|---|----------|----------|----------|
| C | 1.41490  | -0.96180 | -0.13680 |
| N | 1.35780  | -1.62440 | 1.16820  |
| C | 0.07660  | -1.01110 | 1.51440  |
| C | 2.42870  | -1.73810 | 2.04100  |
| C | 3.72200  | -1.66280 | 1.68980  |
| C | 4.85800  | -1.87290 | 2.65130  |
| C | -1.01650 | -1.88430 | 2.11940  |
| N | -1.07970 | -3.19190 | 1.81460  |
| O | -1.85110 | -1.35350 | 2.87070  |
| C | -0.26700 | -3.96540 | 0.85290  |
| C | -1.11600 | -5.21720 | 0.62050  |
| C | -1.78770 | -5.43330 | 1.97910  |
| C | -2.14920 | -4.01180 | 2.40890  |
| C | -0.07820 | -0.59440 | 0.02430  |
| H | 1.68890  | -1.61760 | -0.97080 |
| H | 2.08090  | -0.08630 | -0.13400 |
| H | 0.17330  | -0.14040 | 2.17700  |
| H | 2.13680  | -1.94510 | 3.07290  |
| H | 3.97560  | -1.46150 | 0.64870  |
| H | 5.52130  | -1.00160 | 2.68790  |
| H | 4.48660  | -2.05400 | 3.66470  |
| H | 5.47760  | -2.73070 | 2.36480  |
| H | 0.70430  | -4.21670 | 1.29090  |
| H | -0.08720 | -3.40140 | -0.06360 |
| H | -0.51020 | -6.06490 | 0.29280  |
| H | -1.87270 | -5.01960 | -0.14710 |
| H | -1.07300 | -5.86930 | 2.68590  |
| H | -2.66170 | -6.08610 | 1.93220  |
| H | -3.12030 | -3.69600 | 2.00780  |
| H | -2.17140 | -3.86970 | 3.49210  |
| H | -0.75180 | -1.24660 | -0.53670 |
| H | -0.34950 | 0.44680  | -0.14510 |

**4a VI:**

|   |          |          |          |
|---|----------|----------|----------|
| C | 0.96780  | 0.38560  | 0.48500  |
| N | 1.76310  | -0.85220 | 0.62840  |
| C | 0.58020  | -1.61970 | 1.00250  |
| C | 2.91920  | -0.89730 | 1.40820  |
| C | 3.24750  | -1.88580 | 2.25310  |
| C | 4.53690  | -1.92900 | 3.02490  |
| C | 0.43670  | -3.00080 | 0.37290  |
| N | -0.45330 | -3.82030 | 0.96760  |
| O | 1.05970  | -3.32720 | -0.64160 |
| C | -1.27790 | -3.51030 | 2.14860  |
| C | -2.32030 | -4.63220 | 2.14260  |
| C | -1.55180 | -5.81500 | 1.54300  |
| C | -0.72330 | -5.16240 | 0.43400  |
| C | -0.30240 | -0.48870 | 0.41340  |
| H | 1.21780  | 0.99370  | -0.38840 |
| H | 0.99240  | 1.00740  | 1.39070  |
| H | 0.48020  | -1.68090 | 2.09810  |
| H | 3.58670  | -0.04790 | 1.25250  |
| H | 2.56860  | -2.73040 | 2.37530  |
| H | 5.13370  | -1.03090 | 2.84170  |
| H | 4.35660  | -1.99850 | 4.10370  |
| H | 5.14460  | -2.79720 | 2.74780  |
| H | -1.73100 | -2.51860 | 2.06700  |
| H | -0.66890 | -3.54270 | 3.06170  |
| H | -2.71510 | -4.83040 | 3.14160  |
| H | -3.15760 | -4.35680 | 1.49190  |
| H | -0.88830 | -6.25300 | 2.29710  |
| H | -2.20480 | -6.60390 | 1.16410  |
| H | 0.21650  | -5.67800 | 0.22090  |
| H | -1.28710 | -5.08270 | -0.50460 |
| H | -0.60640 | -0.70450 | -0.61350 |
| H | -1.16010 | -0.17310 | 1.00840  |

**4a VII:**

|   |          |          |          |
|---|----------|----------|----------|
| C | 1.24640  | -0.55560 | -0.56670 |
| N | 1.41620  | -1.53770 | 0.52250  |
| C | 0.29870  | -0.96770 | 1.27930  |
| C | 2.65420  | -1.78710 | 1.10790  |
| C | 2.86000  | -2.02770 | 2.41170  |
| C | 4.20330  | -2.36850 | 2.99360  |
| C | -0.77440 | -1.81760 | 1.94550  |
| N | -0.85850 | -3.14200 | 1.74560  |
| O | -1.62030 | -1.20900 | 2.62420  |
| C | 0.07880  | -4.04310 | 1.04370  |
| C | -0.38870 | -5.43130 | 1.48700  |
| C | -1.89940 | -5.25370 | 1.65530  |
| C | -2.00840 | -3.87480 | 2.30500  |
| C | -0.16090 | -0.24710 | -0.01510 |
| H | 1.31670  | -0.97770 | -1.57310 |
| H | 1.93130  | 0.29800  | -0.47470 |
| H | 0.64460  | -0.25270 | 2.04220  |
| H | 3.47860  | -1.82300 | 0.39360  |
| H | 2.01330  | -1.98900 | 3.09910  |
| H | 4.49520  | -1.65380 | 3.77110  |
| H | 4.20200  | -3.36130 | 3.45820  |
| H | 4.97890  | -2.36120 | 2.22140  |
| H | 1.10920  | -3.83660 | 1.33080  |
| H | -0.01300 | -3.91730 | -0.04090 |
| H | 0.06890  | -5.68750 | 2.44930  |
| H | -0.11610 | -6.20350 | 0.76420  |
| H | -2.38850 | -5.24550 | 0.67470  |
| H | -2.36360 | -6.03430 | 2.26170  |
| H | -2.93590 | -3.34760 | 2.07100  |
| H | -1.91680 | -3.92780 | 3.39700  |
| H | -0.94850 | -0.79920 | -0.53430 |
| H | -0.44310 | 0.79950  | 0.08760  |

**4 l:**

|   |          |          |         |
|---|----------|----------|---------|
| C | -1.78870 | -0.37300 | 6.40280 |
| N | -3.17070 | 0.09630  | 6.32740 |
| C | -3.27450 | 1.53920  | 6.38820 |
| C | -4.24270 | -0.71810 | 6.62380 |
| C | -5.51790 | -0.33010 | 6.81160 |
| C | -6.62630 | -1.30190 | 7.11000 |
| C | -4.18890 | 2.20380  | 5.35290 |
| N | -4.28380 | 1.69450  | 4.11350 |
| O | -4.79810 | 3.23570  | 5.67780 |
| C | -1.01840 | 0.86490  | 6.86930 |
| C | -1.81530 | 2.01530  | 6.24480 |
| C | -5.17520 | 2.33890  | 3.13540 |
| C | -5.20840 | 1.34210  | 1.97600 |
| C | -3.82020 | 0.69890  | 2.03740 |
| C | -3.59020 | 0.52770  | 3.54080 |
| H | -1.43230 | -0.71010 | 5.41640 |
| H | -1.70150 | -1.21440 | 7.09730 |
| H | -3.68980 | 1.85500  | 7.35880 |
| H | -3.98380 | -1.77660 | 6.68080 |
| H | -5.78410 | 0.72430  | 6.75510 |
| H | -7.11000 | -1.08370 | 8.06900 |
| H | -7.41080 | -1.27090 | 6.34520 |
| H | -6.24650 | -2.32760 | 7.15520 |
| H | 0.02900  | 0.85280  | 6.55880 |
| H | -1.05510 | 0.93480  | 7.96160 |
| H | -1.65750 | 2.97920  | 6.73180 |
| H | -1.55760 | 2.12430  | 5.18400 |
| H | -6.15290 | 2.52360  | 3.58730 |
| H | -4.75460 | 3.30640  | 2.83360 |
| H | -5.41990 | 1.82510  | 1.01970 |
| H | -5.98040 | 0.58540  | 2.15550 |
| H | -3.06970 | 1.37920  | 1.61900 |
| H | -3.75510 | -0.25220 | 1.50360 |
| H | -2.53040 | 0.52550  | 3.80410 |
| H | -4.04170 | -0.39970 | 3.91050 |

**4 II:**

|   |          |          |         |
|---|----------|----------|---------|
| C | -2.21710 | -0.41220 | 6.51010 |
| N | -3.39600 | 0.43260  | 6.50620 |
| C | -3.10210 | 1.84640  | 6.36030 |
| C | -4.66480 | -0.04720 | 6.73060 |
| C | -5.02060 | -1.34420 | 6.80710 |
| C | -6.43110 | -1.79410 | 7.06870 |
| C | -3.91740 | 2.57780  | 5.28840 |
| N | -4.20450 | 1.95640  | 4.13040 |
| O | -4.28280 | 3.74330  | 5.50710 |
| C | -1.06960 | 0.58420  | 6.70660 |
| C | -1.58970 | 1.87170  | 6.05370 |
| C | -3.75270 | 0.63340  | 3.65720 |
| C | -4.04940 | 0.68690  | 2.15600 |
| C | -5.30040 | 1.56690  | 2.08480 |
| C | -5.00690 | 2.65740  | 3.11510 |
| H | -2.12280 | -0.97510 | 5.56580 |
| H | -2.27840 | -1.14590 | 7.32350 |
| H | -3.31200 | 2.39490  | 7.29000 |
| H | -5.42300 | 0.73210  | 6.83410 |
| H | -4.26380 | -2.11680 | 6.68140 |
| H | -6.51040 | -2.37210 | 7.99710 |
| H | -7.10630 | -0.93670 | 7.15290 |
| H | -6.80700 | -2.43580 | 6.26330 |
| H | -0.13040 | 0.23850  | 6.26810 |
| H | -0.90700 | 0.74730  | 7.77690 |
| H | -1.11900 | 2.77700  | 6.44140 |
| H | -1.42120 | 1.84570  | 4.97140 |
| H | -2.69130 | 0.47650  | 3.86280 |
| H | -4.32190 | -0.16380 | 4.14850 |
| H | -4.19180 | -0.31050 | 1.73360 |
| H | -3.21980 | 1.16840  | 1.62600 |
| H | -6.18210 | 0.99180  | 2.38930 |
| H | -5.48680 | 1.97570  | 1.08950 |
| H | -5.90120 | 3.08340  | 3.57590 |
| H | -4.42250 | 3.48090  | 2.68540 |



#### 4 III:

|   |          |          |         |
|---|----------|----------|---------|
| C | -1.82990 | -0.41880 | 6.36460 |
| N | -3.21040 | 0.05640  | 6.36760 |
| C | -3.30820 | 1.49940  | 6.38580 |
| C | -4.27510 | -0.74660 | 6.71290 |
| C | -5.54580 | -0.34740 | 6.91030 |
| C | -6.65090 | -1.29930 | 7.27660 |
| C | -4.23530 | 2.16130  | 5.35610 |
| N | -4.31600 | 1.67820  | 4.10390 |
| O | -4.83920 | 3.19200  | 5.69370 |
| C | -1.03420 | 0.81710  | 6.78920 |
| C | -1.85050 | 1.96420  | 6.18440 |
| C | -3.68840 | 0.46570  | 3.54400 |
| C | -4.25800 | 0.39680  | 2.12140 |
| C | -4.54130 | 1.85980  | 1.77270 |
| C | -5.07860 | 2.42110  | 3.08770 |
| H | -1.52880 | -0.75350 | 5.35910 |
| H | -1.70980 | -1.26240 | 7.05150 |
| H | -3.69680 | 1.84260  | 7.35770 |
| H | -4.01590 | -1.80240 | 6.80550 |
| H | -5.80850 | 0.70510  | 6.81520 |
| H | -7.10300 | -1.04360 | 8.24180 |
| H | -7.45840 | -1.28710 | 6.53570 |
| H | -6.27820 | -2.32620 | 7.34580 |
| H | -0.00030 | 0.79720  | 6.43660 |
| H | -1.02810 | 0.89650  | 7.88150 |
| H | -1.66940 | 2.93360  | 6.65240 |
| H | -1.63400 | 2.05730  | 5.11310 |
| H | -2.59550 | 0.57030  | 3.53140 |
| H | -3.94750 | -0.41440 | 4.13290 |
| H | -5.19330 | -0.17390 | 2.12720 |
| H | -3.56800 | -0.09210 | 1.42980 |
| H | -5.24900 | 1.97830  | 0.94910 |
| H | -3.61110 | 2.37260  | 1.50230 |
| H | -6.15210 | 2.22380  | 3.20720 |
| H | -4.91410 | 3.49310  | 3.21250 |

**4 IV:**

|   |          |          |         |
|---|----------|----------|---------|
| C | -1.95220 | 0.17670  | 7.67670 |
| N | -3.31190 | 0.34750  | 7.16370 |
| C | -3.37100 | 1.17180  | 5.98560 |
| C | -4.35770 | -0.46550 | 7.53760 |
| C | -5.55850 | -0.56200 | 6.93530 |
| C | -6.67210 | -1.42600 | 7.46130 |
| C | -3.33190 | 0.35230  | 4.68150 |
| N | -3.88900 | 0.92930  | 3.59780 |
| O | -2.77230 | -0.74710 | 4.62820 |
| C | -1.09480 | 1.03840  | 6.73550 |
| C | -2.09350 | 2.02430  | 6.11140 |
| C | -4.52540 | 2.25590  | 3.53670 |
| C | -4.60870 | 2.52580  | 2.03160 |
| C | -4.80340 | 1.12510  | 1.44060 |
| C | -3.86910 | 0.26000  | 2.28950 |
| H | -1.64450 | -0.87500 | 7.64850 |
| H | -1.89230 | 0.52400  | 8.71670 |
| H | -4.27980 | 1.78580  | 6.00850 |
| H | -4.15600 | -1.04890 | 8.43740 |
| H | -5.75410 | -0.00060 | 6.02210 |
| H | -7.56130 | -0.83810 | 7.71960 |
| H | -6.98940 | -2.17360 | 6.72450 |
| H | -6.35880 | -1.96090 | 8.36380 |
| H | -0.66220 | 0.40970  | 5.95330 |
| H | -0.27950 | 1.54250  | 7.25950 |
| H | -2.29380 | 2.86340  | 6.78540 |
| H | -1.75150 | 2.42520  | 5.15260 |
| H | -5.52580 | 2.22460  | 3.98870 |
| H | -3.93070 | 3.00730  | 4.06360 |
| H | -3.66410 | 2.95550  | 1.67920 |
| H | -5.41420 | 3.22020  | 1.78290 |
| H | -4.56780 | 1.07060  | 0.37560 |
| H | -5.84110 | 0.80110  | 1.57790 |
| H | -2.84600 | 0.25160  | 1.89230 |
| H | -4.19950 | -0.77640 | 2.39390 |

**4 V:**

|   |          |          |          |
|---|----------|----------|----------|
| C | -2.45530 | 0.12990  | 7.55370  |
| N | -3.68850 | 0.14170  | 6.78880  |
| C | -3.67160 | 1.06160  | 5.67690  |
| C | -4.83270 | -0.48210 | 7.21850  |
| C | -4.96850 | -1.21610 | 8.34080  |
| C | -6.26130 | -1.87880 | 8.72970  |
| C | -3.52740 | 0.35020  | 4.31930  |
| N | -3.87020 | 1.07500  | 3.23370  |
| O | -3.07330 | -0.79390 | 4.22630  |
| C | -1.49210 | 0.94680  | 6.68840  |
| C | -2.42090 | 1.92500  | 5.95790  |
| C | -4.44710 | 2.43070  | 3.22140  |
| C | -4.81810 | 2.63520  | 1.74910  |
| C | -3.76720 | 1.80570  | 1.00460  |
| C | -3.63320 | 0.55800  | 1.87880  |
| H | -2.10660 | -0.89740 | 7.71590  |
| H | -2.61140 | 0.59120  | 8.54330  |
| H | -4.58090 | 1.67360  | 5.67370  |
| H | -5.68830 | -0.34540 | 6.55360  |
| H | -4.11190 | -1.35920 | 8.99840  |
| H | -6.60490 | -1.55520 | 9.71900  |
| H | -7.05300 | -1.64250 | 8.01200  |
| H | -6.16800 | -2.97020 | 8.76930  |
| H | -0.99520 | 0.29130  | 5.96720  |
| H | -0.72590 | 1.45440  | 7.27800  |
| H | -2.70090 | 2.75380  | 6.61750  |
| H | -1.97680 | 2.34330  | 5.04940  |
| H | -3.70730 | 3.17170  | 3.55220  |
| H | -5.31930 | 2.49870  | 3.87650  |
| H | -4.82030 | 3.69080  | 1.46960  |
| H | -5.81820 | 2.22970  | 1.56170  |
| H | -4.05540 | 1.56680  | -0.02100 |
| H | -2.81370 | 2.34510  | 0.97600  |
| H | -2.65060 | 0.08390  | 1.82820  |
| H | -4.38770 | -0.19880 | 1.63010  |

#### 4 VI:

|   |          |          |         |
|---|----------|----------|---------|
| C | -1.86600 | -0.29360 | 6.85880 |
| N | -3.18360 | 0.05180  | 6.32590 |
| C | -3.33220 | 1.49460  | 6.39500 |
| C | -4.25830 | -0.76590 | 6.66240 |
| C | -5.52790 | -0.38330 | 6.87730 |
| C | -6.63880 | -1.36050 | 7.14470 |
| C | -4.29400 | 2.11190  | 5.37680 |
| N | -4.32970 | 1.64320  | 4.11940 |
| O | -4.99380 | 3.07610  | 5.72690 |
| C | -0.97010 | 0.79930  | 6.27970 |
| C | -1.88410 | 2.04320  | 6.23870 |
| C | -3.50070 | 0.59010  | 3.50700 |
| C | -3.67010 | 0.85370  | 2.00940 |
| C | -5.11170 | 1.36200  | 1.91510 |
| C | -5.23650 | 2.26700  | 3.14190 |
| H | -1.58420 | -1.30420 | 6.54740 |
| H | -1.86250 | -0.25950 | 7.96170 |
| H | -3.74340 | 1.79630  | 7.37250 |
| H | -3.99410 | -1.82440 | 6.70390 |
| H | -5.79580 | 0.67160  | 6.84850 |
| H | -7.13690 | -1.14880 | 8.09720 |
| H | -7.41010 | -1.31680 | 6.36720 |
| H | -6.26030 | -2.38650 | 7.18300 |
| H | -0.65150 | 0.52100  | 5.27110 |
| H | -0.07260 | 0.96110  | 6.88020 |
| H | -1.66530 | 2.73300  | 7.05560 |
| H | -1.76430 | 2.59980  | 5.30480 |
| H | -2.46410 | 0.66200  | 3.83940 |
| H | -3.87960 | -0.39950 | 3.78610 |
| H | -3.48210 | -0.04180 | 1.41250 |
| H | -2.97270 | 1.63480  | 1.68570 |
| H | -5.81060 | 0.52200  | 1.99620 |
| H | -5.32470 | 1.89330  | 0.98510 |
| H | -6.24890 | 2.32070  | 3.54990 |
| H | -4.90270 | 3.29110  | 2.93200 |

#### 4 VII:

|   |          |          |         |
|---|----------|----------|---------|
| C | -2.24570 | -0.45350 | 6.51960 |
| N | -3.39730 | 0.42440  | 6.59930 |
| C | -3.07960 | 1.82460  | 6.38040 |
| C | -4.67850 | -0.03070 | 6.80290 |
| C | -5.06400 | -1.32100 | 6.83310 |
| C | -6.48360 | -1.74620 | 7.08560 |
| C | -3.92180 | 2.54970  | 5.32210 |
| N | -4.19470 | 1.95320  | 4.14590 |
| O | -4.30650 | 3.70430  | 5.56430 |
| C | -1.06580 | 0.51200  | 6.65660 |
| C | -1.58360 | 1.79830  | 6.00030 |
| C | -4.91990 | 2.71070  | 3.11060 |
| C | -4.69040 | 1.89020  | 1.84130 |
| C | -4.59180 | 0.45800  | 2.37130 |
| C | -3.79040 | 0.61710  | 3.66630 |
| H | -2.21930 | -1.00230 | 5.56160 |
| H | -2.28050 | -1.19810 | 7.32410 |
| H | -3.23340 | 2.40960  | 7.29790 |
| H | -5.41710 | 0.76280  | 6.93460 |
| H | -4.32460 | -2.10650 | 6.68390 |
| H | -6.87350 | -2.35860 | 6.26440 |
| H | -6.57490 | -2.34550 | 7.99930 |
| H | -7.13950 | -0.87640 | 7.19250 |
| H | -0.15450 | 0.13510  | 6.18590 |
| H | -0.85690 | 0.68720  | 7.71710 |
| H | -1.06850 | 2.69950  | 6.33810 |
| H | -1.47390 | 1.73650  | 4.91200 |
| H | -5.98330 | 2.76940  | 3.37470 |
| H | -4.52960 | 3.72900  | 3.05350 |
| H | -3.74400 | 2.18380  | 1.37340 |
| H | -5.48940 | 2.02760  | 1.10950 |
| H | -4.11060 | -0.23490 | 1.67720 |
| H | -5.59090 | 0.07140  | 2.60250 |
| H | -2.71150 | 0.58970  | 3.46200 |
| H | -4.03430 | -0.15540 | 4.39500 |

#### 4 VIII:

|   |          |          |         |
|---|----------|----------|---------|
| C | -1.87240 | 0.14470  | 7.75850 |
| N | -3.07350 | -0.00720 | 6.94140 |
| C | -3.10200 | 0.90460  | 5.82260 |
| C | -4.22930 | -0.59380 | 7.39850 |
| C | -5.43030 | -0.58520 | 6.78670 |
| C | -6.65290 | -1.23360 | 7.37470 |
| C | -3.25360 | 0.18480  | 4.47330 |
| N | -3.91940 | 0.85060  | 3.50720 |
| O | -2.74770 | -0.92300 | 4.27580 |
| C | -1.37200 | 1.53960  | 7.37850 |
| C | -1.73710 | 1.62560  | 5.89230 |
| C | -4.08200 | 0.26030  | 2.17110 |
| C | -5.06630 | 1.21170  | 1.48700 |
| C | -4.74230 | 2.56480  | 2.12830 |
| C | -4.50410 | 2.20110  | 3.59530 |
| H | -1.12430 | -0.62020 | 7.50620 |
| H | -2.11650 | 0.05090  | 8.82160 |
| H | -3.93370 | 1.61500  | 5.95630 |
| H | -4.11810 | -1.09670 | 8.35920 |
| H | -5.54300 | -0.10590 | 5.81570 |
| H | -7.46450 | -0.51220 | 7.52710 |
| H | -7.05000 | -2.02330 | 6.72760 |
| H | -6.42630 | -1.68450 | 8.34530 |
| H | -0.30330 | 1.67300  | 7.56090 |
| H | -1.91910 | 2.29920  | 7.94790 |
| H | -1.79210 | 2.64900  | 5.51240 |
| H | -1.00430 | 1.07250  | 5.29320 |
| H | -3.11240 | 0.23230  | 1.65790 |
| H | -4.44650 | -0.76620 | 2.25610 |
| H | -6.09540 | 0.92140  | 1.72680 |
| H | -4.95700 | 1.21120  | 0.40060 |
| H | -5.53530 | 3.30690  | 2.01110 |
| H | -3.82310 | 2.97410  | 1.69590 |
| H | -5.44900 | 2.17590  | 4.15410 |
| H | -3.82490 | 2.89720  | 4.09190 |

**4 IX:**

|   |          |          |         |
|---|----------|----------|---------|
| C | -2.40840 | 0.06620  | 7.49850 |
| N | -3.70170 | 0.50040  | 6.98380 |
| C | -3.56800 | 1.31220  | 5.79530 |
| C | -4.85320 | -0.21710 | 7.23340 |
| C | -4.99100 | -1.22500 | 8.11330 |
| C | -6.30570 | -1.90620 | 8.37570 |
| C | -3.51740 | 0.48000  | 4.50250 |
| N | -3.88330 | 1.11360  | 3.37120 |
| O | -3.13010 | -0.69390 | 4.50700 |
| C | -1.38260 | 0.89140  | 6.69920 |
| C | -2.21160 | 2.00160  | 6.03240 |
| C | -4.32910 | 2.51220  | 3.25520 |
| C | -4.27230 | 2.76520  | 1.74620 |
| C | -4.60360 | 1.39100  | 1.15380 |
| C | -3.84870 | 0.42800  | 2.07250 |
| H | -2.26940 | -1.01210 | 7.33810 |
| H | -2.35570 | 0.25570  | 8.57920 |
| H | -4.39370 | 2.03030  | 5.74360 |
| H | -5.71910 | 0.13060  | 6.66660 |
| H | -4.12570 | -1.57180 | 8.67510 |
| H | -7.09550 | -1.48930 | 7.74200 |
| H | -6.25230 | -2.98300 | 8.17600 |
| H | -6.62290 | -1.79210 | 9.41950 |
| H | -0.92250 | 0.26250  | 5.93310 |
| H | -0.58650 | 1.29250  | 7.33050 |
| H | -2.36060 | 2.84390  | 6.71480 |
| H | -1.75420 | 2.37770  | 5.11290 |
| H | -5.35300 | 2.62270  | 3.63580 |
| H | -3.67680 | 3.18670  | 3.81650 |
| H | -3.25890 | 3.06620  | 1.45820 |
| H | -4.96390 | 3.55190  | 1.43700 |
| H | -4.30460 | 1.28930  | 0.10870 |
| H | -5.68090 | 1.20330  | 1.22130 |
| H | -2.80850 | 0.28740  | 1.75240 |
| H | -4.31260 | -0.55760 | 2.15750 |

**4 X:**

|   |          |          |         |
|---|----------|----------|---------|
| C | -1.95770 | 0.20790  | 7.67030 |
| N | -3.32710 | 0.35810  | 7.17460 |
| C | -3.41070 | 1.17440  | 5.99380 |
| C | -4.34720 | -0.48730 | 7.54680 |
| C | -5.54930 | -0.60660 | 6.95250 |
| C | -6.63650 | -1.50620 | 7.47200 |
| C | -3.36070 | 0.35130  | 4.69260 |
| N | -3.93210 | 0.90960  | 3.60600 |
| O | -2.76020 | -0.72640 | 4.64140 |
| C | -1.12480 | 1.08880  | 6.72490 |
| C | -2.14770 | 2.05070  | 6.10330 |
| C | -3.77570 | 0.30730  | 2.27470 |
| C | -4.11250 | 1.46330  | 1.33170 |
| C | -5.17430 | 2.24360  | 2.11230 |
| C | -4.66390 | 2.18790  | 3.55660 |
| H | -1.63380 | -0.83890 | 7.63240 |
| H | -1.89280 | 0.55060  | 8.71200 |
| H | -4.32480 | 1.77740  | 6.02410 |
| H | -4.12320 | -1.07470 | 8.43880 |
| H | -5.76560 | -0.03680 | 6.04910 |
| H | -7.54070 | -0.94540 | 7.73820 |
| H | -6.93480 | -2.25450 | 6.72850 |
| H | -6.30570 | -2.04130 | 8.36790 |
| H | -0.67790 | 0.47010  | 5.94270 |
| H | -0.32130 | 1.61420  | 7.24620 |
| H | -1.82400 | 2.45490  | 5.13970 |
| H | -2.35820 | 2.88850  | 6.77570 |
| H | -2.75980 | -0.07710 | 2.16050 |
| H | -4.47270 | -0.53220 | 2.15740 |
| H | -4.46290 | 1.11880  | 0.35640 |
| H | -3.22530 | 2.08710  | 1.17500 |
| H | -5.30450 | 3.27070  | 1.76400 |
| H | -6.14140 | 1.73360  | 2.04220 |
| H | -3.99040 | 3.02680  | 3.77430 |
| H | -5.48340 | 2.20640  | 4.28040 |



#### 4 XI:

|   |          |          |         |
|---|----------|----------|---------|
| C | -2.42900 | 0.10360  | 7.48100 |
| N | -3.74890 | 0.48240  | 6.99240 |
| C | -3.67330 | 1.29820  | 5.80200 |
| C | -4.86370 | -0.28200 | 7.27020 |
| C | -4.93800 | -1.29120 | 8.15520 |
| C | -6.21600 | -2.02680 | 8.45010 |
| C | -3.61700 | 0.46930  | 4.50750 |
| N | -3.95040 | 1.11160  | 3.36800 |
| O | -3.24030 | -0.70760 | 4.51570 |
| C | -1.45410 | 0.96240  | 6.65460 |
| C | -2.33920 | 2.04010  | 6.00730 |
| C | -4.39960 | 2.50970  | 3.24360 |
| C | -4.79350 | 2.61590  | 1.76730 |
| C | -3.84080 | 1.63190  | 1.07980 |
| C | -3.78960 | 0.45920  | 2.06060 |
| H | -2.25130 | -0.96950 | 7.32500 |
| H | -2.36000 | 0.30360  | 8.55900 |
| H | -4.52390 | 1.98750  | 5.77090 |
| H | -5.75690 | 0.02750  | 6.72470 |
| H | -4.04590 | -1.59820 | 8.69630 |
| H | -6.50880 | -1.93360 | 9.50200 |
| H | -7.03860 | -1.63890 | 7.84240 |
| H | -6.12600 | -3.09820 | 8.24070 |
| H | -0.99060 | 0.34770  | 5.87850 |
| H | -0.65650 | 1.39260  | 7.26460 |
| H | -2.50510 | 2.87640  | 6.69350 |
| H | -1.91810 | 2.43390  | 5.07780 |
| H | -5.24090 | 2.71870  | 3.90990 |
| H | -3.58320 | 3.20260  | 3.48810 |
| H | -4.70900 | 3.63910  | 1.39370 |
| H | -5.83140 | 2.28850  | 1.63760 |
| H | -2.84490 | 2.07910  | 0.98080 |
| H | -4.17880 | 1.32880  | 0.08670 |
| H | -2.85040 | -0.09900 | 2.03770 |
| H | -4.61020 | -0.25040 | 1.89360 |

**4b I:**

|   |          |          |          |
|---|----------|----------|----------|
| C | 1.73420  | 1.00180  | -1.61250 |
| N | 1.40130  | -0.35720 | -1.16470 |
| C | 0.87500  | -1.28620 | -2.14860 |
| C | 2.22850  | -0.88360 | -0.17410 |
| C | 2.55210  | -2.17050 | 0.04050  |
| C | 3.37860  | -2.61580 | 1.21610  |
| C | 1.95680  | -1.84000 | -3.09850 |
| N | 1.75630  | -3.08750 | -3.57220 |
| O | 2.93180  | -1.16240 | -3.44330 |
| C | 0.57690  | 1.63040  | -2.37690 |
| C | -0.25670 | -0.64020 | -2.97100 |
| C | 0.65120  | -3.99940 | -3.23480 |
| C | 0.76930  | -5.08980 | -4.30330 |
| C | 2.27790  | -5.15940 | -4.55760 |
| C | 2.70240  | -3.69030 | -4.52260 |
| C | 0.14670  | 0.72360  | -3.52770 |
| H | 2.63210  | 0.98910  | -2.24490 |
| H | 1.95970  | 1.59010  | -0.71730 |
| H | 0.45050  | -2.12440 | -1.58560 |
| H | 2.60810  | -0.12150 | 0.50910  |
| H | 2.22080  | -2.94750 | -0.64580 |
| H | 3.69130  | -1.75990 | 1.82270  |
| H | 2.82350  | -3.29930 | 1.86960  |
| H | 4.28170  | -3.14630 | 0.89320  |
| H | 0.88740  | 2.61280  | -2.74630 |
| H | -0.27050 | 1.78500  | -1.69660 |
| H | -1.12540 | -0.52270 | -2.31170 |
| H | -0.54990 | -1.31840 | -3.77940 |
| H | -0.31530 | -3.49190 | -3.26590 |
| H | 0.78880  | -4.41760 | -2.22820 |
| H | 0.24760  | -4.77360 | -5.21350 |
| H | 0.33830  | -6.03650 | -3.97300 |
| H | 2.53350  | -5.64470 | -5.50190 |
| H | 2.76920  | -5.70950 | -3.74780 |
| H | 3.72720  | -3.53570 | -4.17840 |
| H | 2.59800  | -3.21100 | -5.50400 |
| H | 0.97670  | 0.60900  | -4.23620 |
| H | -0.69220 | 1.16290  | -4.07670 |

**4b II:**

|   |          |          |          |
|---|----------|----------|----------|
| C | 1.65460  | 1.13890  | -0.31970 |
| N | 1.51710  | -0.15720 | -1.00090 |
| C | 0.13880  | -0.60540 | -1.16030 |
| C | 2.43250  | -1.09820 | -0.50230 |
| C | 2.21370  | -2.37680 | -0.16070 |
| C | 3.31960  | -3.29510 | 0.27980  |
| C | -0.03740 | -1.84290 | -2.04960 |
| N | 0.69110  | -1.98610 | -3.16890 |
| O | -0.92930 | -2.65480 | -1.75370 |
| C | 0.83420  | 2.23340  | -0.98540 |
| C | -0.75490 | 0.49240  | -1.77170 |
| C | 0.45510  | -3.15750 | -4.02960 |
| C | 1.58500  | -3.08010 | -5.05790 |
| C | 1.85130  | -1.57590 | -5.16570 |
| C | 1.74320  | -1.11020 | -3.71340 |
| C | -0.63320 | 1.81880  | -1.02920 |
| H | 2.71840  | 1.39740  | -0.31930 |
| H | 1.34140  | 1.04450  | 0.73680  |
| H | -0.28650 | -0.90150 | -0.18420 |
| H | 3.44240  | -0.69090 | -0.41790 |
| H | 1.21340  | -2.80280 | -0.20030 |
| H | 3.44260  | -4.13660 | -0.41150 |
| H | 4.27540  | -2.76470 | 0.33670  |
| H | 3.10980  | -3.72260 | 1.26630  |
| H | 1.20560  | 2.40130  | -2.00470 |
| H | 0.96650  | 3.16640  | -0.42790 |
| H | -1.78550 | 0.12430  | -1.76320 |
| H | -0.47140 | 0.64210  | -2.82180 |
| H | -0.53370 | -3.07370 | -4.49720 |
| H | 0.46570  | -4.07160 | -3.43060 |
| H | 1.31090  | -3.54310 | -6.00830 |
| H | 2.47600  | -3.58960 | -4.67450 |
| H | 1.07430  | -1.09620 | -5.77190 |
| H | 2.82330  | -1.33420 | -5.60200 |
| H | 2.68350  | -1.27310 | -3.17290 |
| H | 1.47520  | -0.05860 | -3.61150 |
| H | -1.24590 | 2.58130  | -1.52050 |
| H | -1.01340 | 1.70710  | -0.00480 |

**4b III:**

|   |          |          |          |
|---|----------|----------|----------|
| C | 1.71520  | 1.00150  | -1.61890 |
| N | 1.41250  | -0.35500 | -1.14300 |
| C | 0.89030  | -1.30950 | -2.10310 |
| C | 2.26840  | -0.85280 | -0.16250 |
| C | 2.61660  | -2.13130 | 0.06280  |
| C | 3.47630  | -2.54860 | 1.22450  |
| C | 1.96840  | -1.86300 | -3.05680 |
| N | 1.75780  | -3.10270 | -3.55080 |
| O | 2.94340  | -1.18540 | -3.39990 |
| C | 0.53820  | 1.59420  | -2.38270 |
| C | -0.26090 | -0.69940 | -2.92560 |
| C | 0.68150  | -4.03900 | -3.18460 |
| C | 1.09760  | -5.33950 | -3.88090 |
| C | 1.85330  | -4.84840 | -5.11890 |
| C | 2.64570  | -3.65520 | -4.58350 |
| C | 0.11290  | 0.65960  | -3.51300 |
| H | 2.60660  | 0.99320  | -2.26010 |
| H | 1.93830  | 1.61010  | -0.73640 |
| H | 0.47970  | -2.13990 | -1.52060 |
| H | 2.64950  | -0.07490 | 0.50140  |
| H | 2.28430  | -2.92260 | -0.60690 |
| H | 3.78770  | -1.68020 | 1.81360  |
| H | 2.94810  | -3.23390 | 1.89820  |
| H | 4.38090  | -3.06700 | 0.88690  |
| H | 0.82670  | 2.57550  | -2.77280 |
| H | -0.30530 | 1.74540  | -1.69630 |
| H | -1.12390 | -0.58230 | -2.25900 |
| H | -0.55150 | -1.40250 | -3.71350 |
| H | -0.28820 | -3.68450 | -3.55640 |
| H | 0.60910  | -4.16180 | -2.10010 |
| H | 0.23800  | -5.97070 | -4.11610 |
| H | 1.77160  | -5.90790 | -3.23090 |
| H | 1.14480  | -4.51240 | -5.88430 |
| H | 2.49590  | -5.61210 | -5.56150 |
| H | 3.59750  | -3.96380 | -4.13270 |
| H | 2.85940  | -2.89280 | -5.33580 |
| H | 0.93700  | 0.54710  | -4.22890 |
| H | -0.73970 | 1.07400  | -4.06040 |

**4b IV:**

|   |          |          |          |
|---|----------|----------|----------|
| C | 1.70290  | 0.94200  | -1.58220 |
| N | 1.62370  | -0.49590 | -1.32440 |
| C | 0.26140  | -1.01400 | -1.40340 |
| C | 2.48650  | -0.99820 | -0.35390 |
| C | 2.32090  | -2.05040 | 0.46610  |
| C | 3.40640  | -2.53200 | 1.39070  |
| C | -0.24680 | -0.96340 | -2.85770 |
| N | 0.57370  | -1.44820 | -3.80900 |
| O | -1.36960 | -0.52340 | -3.13740 |
| C | 0.85410  | 1.73480  | -0.58660 |
| C | -0.67430 | -0.27420 | -0.43890 |
| C | 0.12970  | -1.47380 | -5.21050 |
| C | 1.32400  | -2.08290 | -5.94930 |
| C | 1.94850  | -3.00400 | -4.89570 |
| C | 1.84480  | -2.16730 | -3.61980 |
| C | -0.59680 | 1.24580  | -0.63250 |
| H | 1.34980  | 1.12700  | -2.60710 |
| H | 2.75510  | 1.24050  | -1.54190 |
| H | 0.28860  | -2.08010 | -1.14550 |
| H | 3.43460  | -0.45690 | -0.32470 |
| H | 1.37940  | -2.59550 | 0.49320  |
| H | 3.07400  | -2.53120 | 2.43530  |
| H | 3.71750  | -3.55740 | 1.15790  |
| H | 4.29300  | -1.89360 | 1.32180  |
| H | 0.91050  | 2.80450  | -0.81550 |
| H | 1.26780  | 1.59200  | 0.42120  |
| H | -0.35800 | -0.53050 | 0.57990  |
| H | -1.69930 | -0.62910 | -0.57200 |
| H | -0.12780 | -0.46530 | -5.54540 |
| H | -0.76970 | -2.09560 | -5.29850 |
| H | 2.03530  | -1.29660 | -6.22570 |
| H | 1.02370  | -2.60410 | -6.86070 |
| H | 2.97990  | -3.28590 | -5.11940 |
| H | 1.35480  | -3.91960 | -4.79370 |
| H | 1.82720  | -2.76500 | -2.70470 |
| H | 2.67470  | -1.45680 | -3.54030 |
| H | -1.03760 | 1.50580  | -1.60180 |
| H | -1.19280 | 1.74660  | 0.13750  |

**4b V:**

|   |          |          |          |
|---|----------|----------|----------|
| C | 1.55400  | 0.73250  | -0.17190 |
| N | 1.32150  | -0.46180 | -0.97940 |
| C | -0.08000 | -0.69850 | -1.34430 |
| C | 1.99320  | -1.61050 | -0.54010 |
| C | 2.90740  | -1.71180 | 0.43810  |
| C | 3.62220  | -2.99820 | 0.74830  |
| C | -0.26890 | -1.84030 | -2.34940 |
| N | 0.56930  | -1.96390 | -3.39520 |
| O | -1.23720 | -2.60260 | -2.20800 |
| C | 0.92020  | 1.97750  | -0.77870 |
| C | -0.75760 | 0.55330  | -1.92700 |
| C | 1.71410  | -1.11530 | -3.77930 |
| C | 1.91000  | -1.46170 | -5.25550 |
| C | 1.54320  | -2.94760 | -5.30510 |
| C | 0.32800  | -3.03290 | -4.38020 |
| C | -0.57050 | 1.76040  | -1.01400 |
| H | 2.63650  | 0.87110  | -0.09260 |
| H | 1.16800  | 0.58020  | 0.85390  |
| H | -0.65550 | -1.01220 | -0.45660 |
| H | 1.73750  | -2.50740 | -1.10570 |
| H | 3.17360  | -0.84830 | 1.04240  |
| H | 3.26110  | -3.81450 | 0.11510  |
| H | 4.70370  | -2.90700 | 0.59290  |
| H | 3.47520  | -3.29240 | 1.79360  |
| H | 1.41400  | 2.20880  | -1.73140 |
| H | 1.09640  | 2.82300  | -0.10600 |
| H | -1.81770 | 0.32040  | -2.06970 |
| H | -0.33760 | 0.77890  | -2.91540 |
| H | 2.59960  | -1.38210 | -3.18990 |
| H | 1.50490  | -0.06010 | -3.60430 |
| H | 2.92760  | -1.25170 | -5.59260 |
| H | 1.21600  | -0.87960 | -5.87240 |
| H | 1.32140  | -3.30790 | -6.31170 |
| H | 2.36600  | -3.54850 | -4.90140 |
| H | -0.61000 | -2.83310 | -4.91280 |
| H | 0.22570  | -3.99600 | -3.87370 |
| H | -1.03180 | 2.64690  | -1.46020 |
| H | -1.07380 | 1.58090  | -0.05440 |

**4b VI:**

|   |          |          |          |
|---|----------|----------|----------|
| C | -0.09240 | -0.51630 | -1.24010 |
| N | 0.96870  | -1.32180 | -1.84060 |
| C | 1.16510  | -0.96490 | -3.25180 |
| C | 2.12510  | -1.54520 | -1.08740 |
| C | 2.33070  | -1.31200 | 0.21880  |
| C | 3.59460  | -1.72260 | 0.92450  |
| C | 2.14360  | -1.92340 | -3.94180 |
| N | 1.84760  | -3.23450 | -3.88930 |
| O | 3.15100  | -1.50720 | -4.52940 |
| C | 0.23450  | 0.97920  | -1.30170 |
| C | 1.56720  | 0.50220  | -3.40440 |
| C | 0.66240  | -3.86600 | -3.28530 |
| C | 0.64380  | -5.24400 | -3.94860 |
| C | 2.13510  | -5.56250 | -4.10000 |
| C | 2.73730  | -4.21930 | -4.52200 |
| C | 0.50590  | 1.39660  | -2.75200 |
| H | -0.26340 | -0.85930 | -0.21610 |
| H | -1.01390 | -0.71640 | -1.80400 |
| H | 0.19050  | -1.10920 | -3.74590 |
| H | 2.92490  | -2.01970 | -1.65820 |
| H | 1.57270  | -0.81650 | 0.82190  |
| H | 3.39850  | -2.45460 | 1.71700  |
| H | 4.30730  | -2.17210 | 0.22570  |
| H | 4.08590  | -0.86540 | 1.39890  |
| H | 1.12150  | 1.17890  | -0.68830 |
| H | -0.59250 | 1.56040  | -0.87970 |
| H | 1.68710  | 0.74630  | -4.46420 |
| H | 2.54340  | 0.65050  | -2.92540 |
| H | -0.23790 | -3.27820 | -3.48190 |
| H | 0.78560  | -3.94570 | -2.19970 |
| H | 0.16780  | -5.17970 | -4.93360 |
| H | 0.10090  | -5.98010 | -3.35160 |
| H | 2.33880  | -6.35310 | -4.82490 |
| H | 2.54920  | -5.87200 | -3.13380 |
| H | 3.76610  | -4.07220 | -4.18210 |
| H | 2.72070  | -4.08340 | -5.61050 |
| H | 0.81780  | 2.44500  | -2.79500 |
| H | -0.42770 | 1.31990  | -3.32730 |

**4b VII:**

|   |          |          |          |
|---|----------|----------|----------|
| C | 1.54390  | 0.66820  | -0.05840 |
| N | 1.32970  | -0.46530 | -0.95320 |
| C | -0.06970 | -0.63940 | -1.37210 |
| C | 1.97090  | -1.65440 | -0.57690 |
| C | 2.83780  | -1.84390 | 0.43030  |
| C | 3.52760  | -3.15910 | 0.66650  |
| C | -0.26130 | -1.79490 | -2.36410 |
| N | 0.45710  | -1.83090 | -3.50100 |
| O | -1.10230 | -2.67090 | -2.11140 |
| C | 0.98580  | 1.96590  | -0.63090 |
| C | -0.65410 | 0.65210  | -1.95980 |
| C | 1.48500  | -0.89490 | -3.98730 |
| C | 2.35050  | -1.79220 | -4.86960 |
| C | 1.30880  | -2.70050 | -5.53280 |
| C | 0.30800  | -2.98430 | -4.40590 |
| C | -0.49020 | 1.81430  | -0.98460 |
| H | 2.62230  | 0.76910  | 0.09540  |
| H | 1.08800  | 0.46540  | 0.92900  |
| H | -0.68370 | -0.92880 | -0.50230 |
| H | 1.73970  | -2.49860 | -1.22750 |
| H | 3.07760  | -1.03620 | 1.11720  |
| H | 3.18720  | -3.91750 | -0.04520 |
| H | 4.61540  | -3.06910 | 0.56560  |
| H | 3.33190  | -3.53370 | 1.67730  |
| H | 1.55400  | 2.23490  | -1.53050 |
| H | 1.13630  | 2.76560  | 0.10150  |
| H | -1.70940 | 0.47420  | -2.19280 |
| H | -0.14450 | 0.89440  | -2.89960 |
| H | 2.01580  | -0.43680 | -3.15370 |
| H | 1.01690  | -0.10650 | -4.59250 |
| H | 3.03120  | -2.38030 | -4.24300 |
| H | 2.94690  | -1.22020 | -5.58370 |
| H | 0.81440  | -2.16120 | -6.34820 |
| H | 1.73270  | -3.61910 | -5.94420 |
| H | -0.72540 | -3.06840 | -4.75340 |
| H | 0.54890  | -3.90150 | -3.85540 |
| H | -0.88340 | 2.73630  | -1.42400 |
| H | -1.07070 | 1.61640  | -0.07350 |



**4b VIII:**

|   |          |          |          |
|---|----------|----------|----------|
| C | 0.75100  | 0.23580  | 0.53100  |
| N | 1.45930  | 0.07570  | -0.73670 |
| C | 0.53670  | -0.11020 | -1.86940 |
| C | 2.50100  | -0.87040 | -0.71890 |
| C | 2.92930  | -1.60320 | 0.32030  |
| C | 4.11630  | -2.52150 | 0.23030  |
| C | 1.32330  | -0.19900 | -3.18240 |
| N | 1.20630  | -1.32920 | -3.90450 |
| O | 2.02240  | 0.74870  | -3.55950 |
| C | -0.24270 | 1.39090  | 0.48290  |
| C | -0.45760 | 1.04930  | -1.97430 |
| C | 1.97510  | -1.50020 | -5.14600 |
| C | 1.94140  | -3.01200 | -5.36680 |
| C | 0.56710  | -3.40660 | -4.81690 |
| C | 0.42130  | -2.53320 | -3.56710 |
| C | -1.22930 | 1.21580  | -0.66840 |
| H | 1.49660  | 0.41920  | 1.31000  |
| H | 0.22240  | -0.70100 | 0.79600  |
| H | -0.03150 | -1.04040 | -1.70560 |
| H | 3.02200  | -0.95890 | -1.67290 |
| H | 2.43110  | -1.54090 | 1.28500  |
| H | 4.92150  | -2.20840 | 0.90500  |
| H | 3.84660  | -3.54630 | 0.51020  |
| H | 4.52110  | -2.54380 | -0.78610 |
| H | 0.30850  | 2.33030  | 0.35500  |
| H | -0.76570 | 1.44470  | 1.44340  |
| H | -1.13720 | 0.85410  | -2.81250 |
| H | 0.10500  | 1.96050  | -2.20650 |
| H | 2.97940  | -1.09060 | -5.01720 |
| H | 1.48860  | -0.95570 | -5.96560 |
| H | 2.73340  | -3.49150 | -4.78110 |
| H | 2.08040  | -3.28320 | -6.41510 |
| H | -0.21450 | -3.15040 | -5.54020 |
| H | 0.47880  | -4.46960 | -4.58220 |
| H | -0.62260 | -2.28310 | -3.36240 |
| H | 0.84310  | -3.02580 | -2.68210 |
| H | -1.90830 | 2.07170  | -0.73340 |
| H | -1.84990 | 0.32640  | -0.49010 |

**4b IX:**

|   |          |          |          |
|---|----------|----------|----------|
| C | -0.03100 | -0.57390 | -1.11810 |
| N | 1.03770  | -1.35370 | -1.74150 |
| C | 1.15450  | -1.02750 | -3.17330 |
| C | 2.23820  | -1.49400 | -1.03520 |
| C | 2.48460  | -1.20870 | 0.25300  |
| C | 3.79760  | -1.52860 | 0.91390  |
| C | 2.15580  | -1.96440 | -3.86150 |
| N | 1.79010  | -3.25320 | -3.96470 |
| O | 3.24620  | -1.55640 | -4.28270 |
| C | 0.22470  | 0.93150  | -1.23840 |
| C | 1.48430  | 0.45000  | -3.38230 |
| C | 2.69440  | -4.24830 | -4.55840 |
| C | 1.81990  | -5.50170 | -4.66540 |
| C | 0.82580  | -5.33920 | -3.51010 |
| C | 0.50920  | -3.84350 | -3.54280 |
| C | 0.41230  | 1.31670  | -2.71050 |
| H | -0.14110 | -0.89140 | -0.07770 |
| H | -0.96640 | -0.83240 | -1.63310 |
| H | 0.16630  | -1.23050 | -3.61320 |
| H | 3.03710  | -1.93920 | -1.62860 |
| H | 1.72620  | -0.73700 | 0.87440  |
| H | 4.50420  | -1.95930 | 0.19730  |
| H | 4.25940  | -0.63180 | 1.34230  |
| H | 3.67550  | -2.24590 | 1.73420  |
| H | 1.12760  | 1.18940  | -0.67200 |
| H | -0.60910 | 1.48720  | -0.79580 |
| H | 1.54900  | 0.66800  | -4.45340 |
| H | 2.47180  | 0.65290  | -2.95030 |
| H | 3.55450  | -4.40120 | -3.89490 |
| H | 3.07140  | -3.89340 | -5.52110 |
| H | 2.40630  | -6.42090 | -4.60590 |
| H | 1.28330  | -5.50210 | -5.62060 |
| H | -0.07090 | -5.95300 | -3.61800 |
| H | 1.30400  | -5.59390 | -2.55780 |
| H | -0.26930 | -3.62420 | -4.28600 |
| H | 0.20620  | -3.44250 | -2.57430 |
| H | 0.67450  | 2.37600  | -2.79660 |
| H | -0.54120 | 1.18170  | -3.24080 |

**4b X:**

|   |          |          |          |
|---|----------|----------|----------|
| C | 0.70500  | 0.08250  | 0.53640  |
| N | 1.36550  | 0.02210  | -0.76490 |
| C | 0.39990  | -0.05300 | -1.87710 |
| C | 2.42660  | -0.89530 | -0.85750 |
| C | 2.91080  | -1.69540 | 0.10450  |
| C | 4.12160  | -2.56300 | -0.10210 |
| C | 1.13490  | -0.09060 | -3.22300 |
| N | 1.15150  | -1.26030 | -3.88890 |
| O | 1.66830  | 0.92710  | -3.68040 |
| C | -0.26240 | 1.25840  | 0.62130  |
| C | -0.54970 | 1.14580  | -1.85330 |
| C | 1.81680  | -1.35600 | -5.19680 |
| C | 1.48810  | -2.77810 | -5.65300 |
| C | 1.41180  | -3.55270 | -4.33350 |
| C | 0.69410  | -2.57550 | -3.39990 |
| C | -1.28100 | 1.21610  | -0.51500 |
| H | 1.48020  | 0.18620  | 1.30100  |
| H | 0.16710  | -0.86480 | 0.73840  |
| H | -0.20900 | -0.96710 | -1.76370 |
| H | 2.91920  | -0.89250 | -1.83110 |
| H | 2.44360  | -1.73030 | 1.08560  |
| H | 3.89370  | -3.61640 | 0.09630  |
| H | 4.49120  | -2.48450 | -1.12940 |
| H | 4.94110  | -2.28190 | 0.56960  |
| H | 0.31010  | 2.19220  | 0.56670  |
| H | -0.76030 | 1.23470  | 1.59630  |
| H | -1.25770 | 1.04970  | -2.68430 |
| H | 0.03870  | 2.05400  | -2.02110 |
| H | 2.89650  | -1.20400 | -5.07160 |
| H | 1.44360  | -0.57700 | -5.86560 |
| H | 2.23560  | -3.17420 | -6.34350 |
| H | 0.51460  | -2.79600 | -6.15530 |
| H | 0.88420  | -4.50540 | -4.41460 |
| H | 2.42090  | -3.75080 | -3.95490 |
| H | -0.39530 | -2.66140 | -3.49600 |
| H | 0.96890  | -2.71980 | -2.35210 |
| H | -1.93510 | 2.09300  | -0.48240 |
| H | -1.92390 | 0.33220  | -0.39980 |

## 4. Preparation and NMR Spectroscopic Analysis of the Enamines

**General Procedure:** The secondary amine (1 equiv., 100  $\mu\text{mol}$ ) and butanal (1.5 equiv., 150  $\mu\text{mol}$ ) was stirred over pre-activated molecular sieve (3 Å) in  $d^6$ -DMSO (1.0 mL) for 30 min. The NMR spectra of the crude mixture were recorded after filtration.

### 4.1. Enamines 3a', 3' and 3b'

3a':

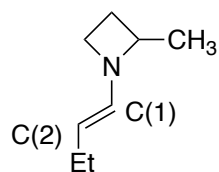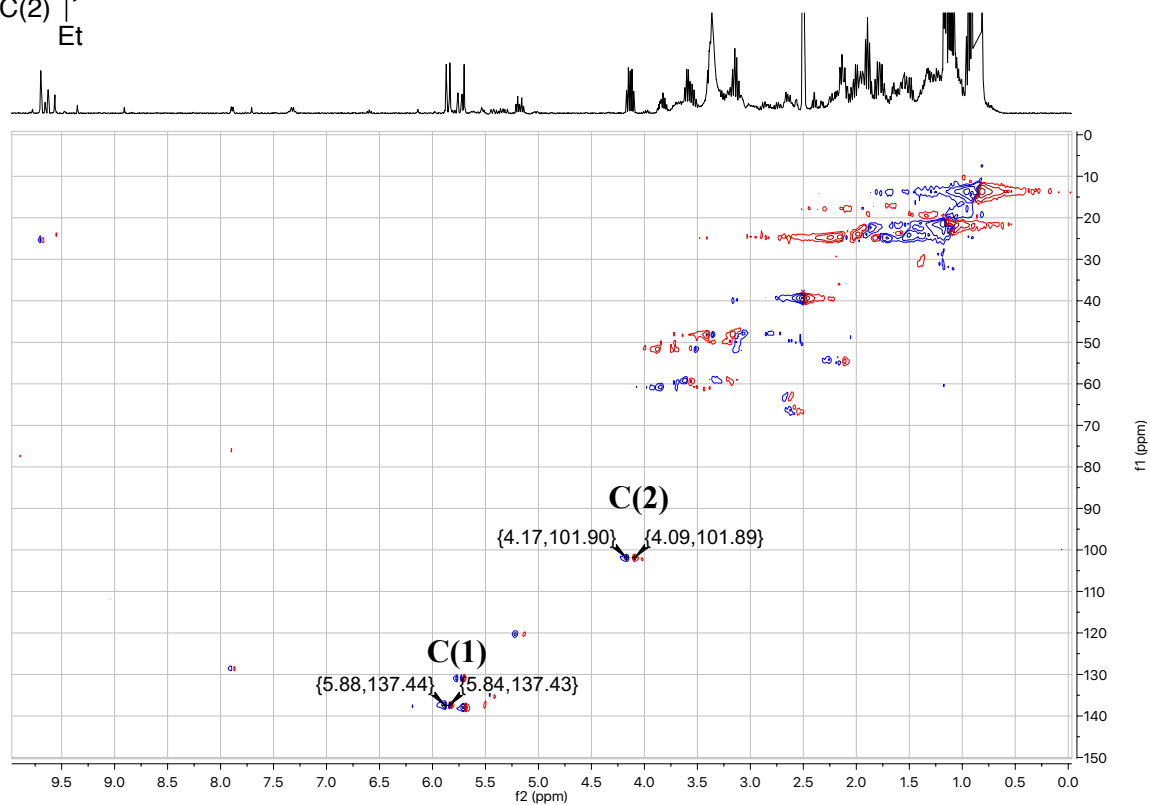

3`:

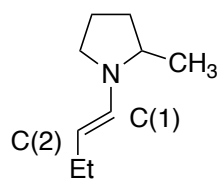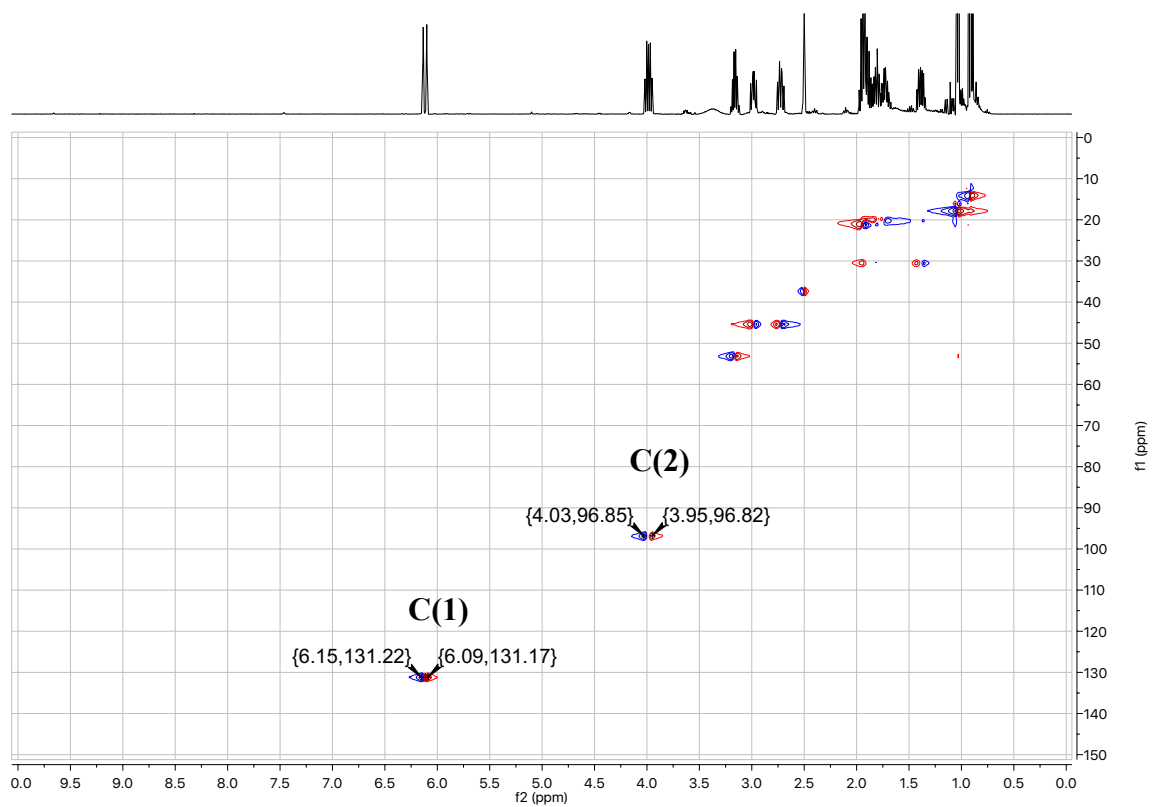

**3b`:**

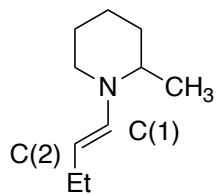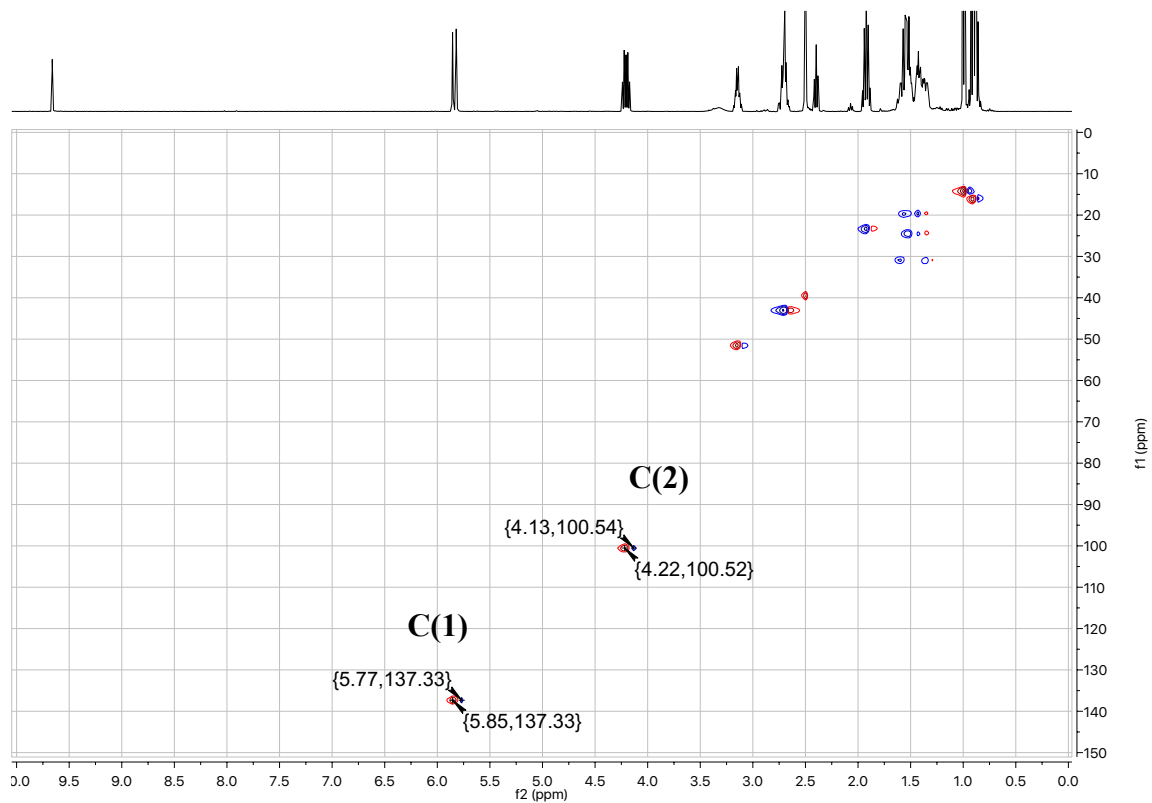

## 4.2. Enamines 2a-En, 2-En and 2b-En

### 2a-En:

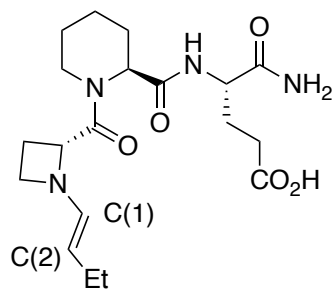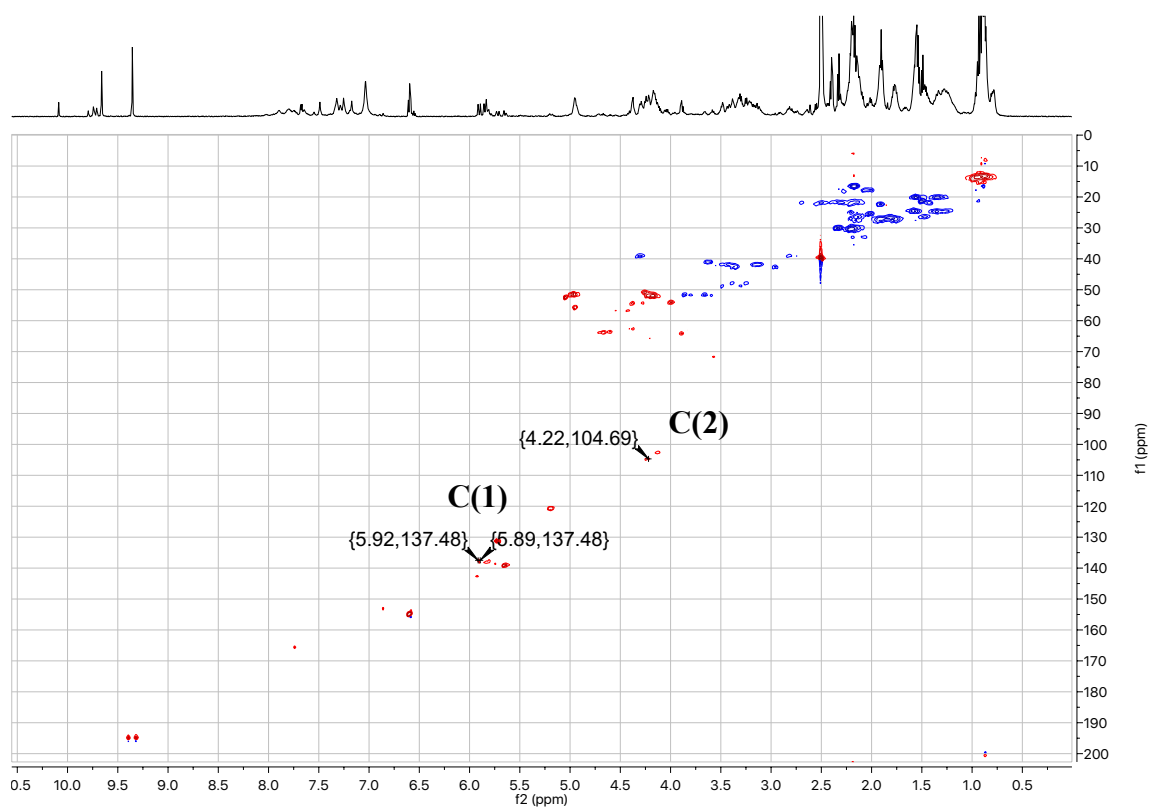

**2-En:**

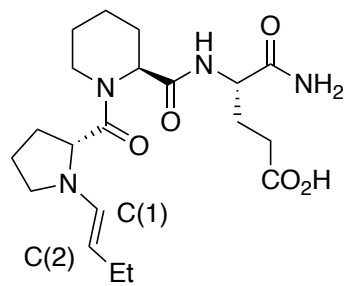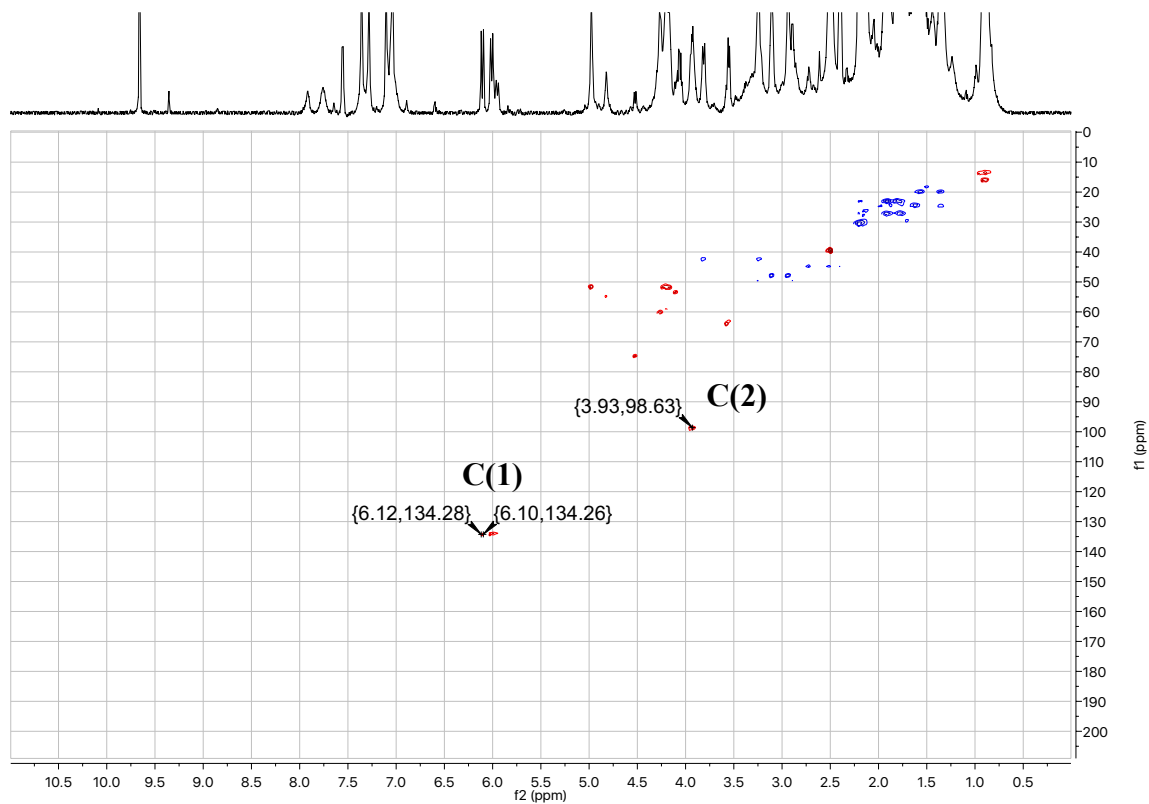



**2b-En:**

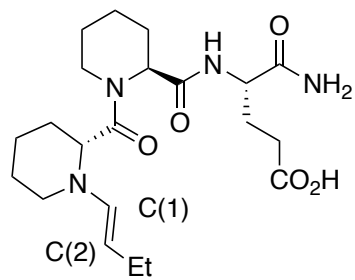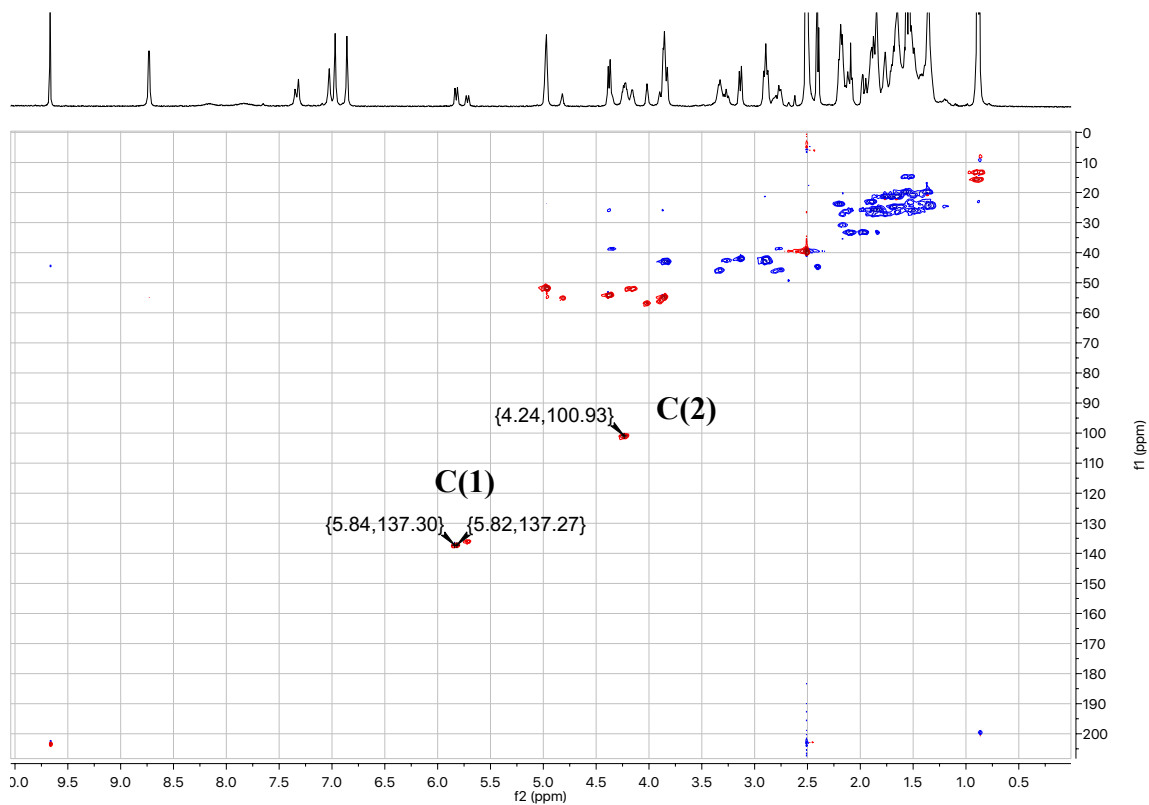

## 5. *In Situ* IR Monitoring – Kinetic Experiments

All experiments were carried out at room temperature using butanal and (*E*)-nitrostyrene. Chloroform was filtered through a plug of basic alumina prior to use. Reaction progress was monitored by following the N-O-stretching mode of the  $\gamma$ -nitroaldehyde product at  $1554\text{ cm}^{-1}$ .

**General Procedure to determine the rate-order of butanal:** A volumetric flask (1 mL) was charged with the peptide TFA salt (3 mol%, 15  $\mu\text{mol}$ ) and (*E*)-nitrostyrene (74.6 mg, 0.5 mmol). The mixture was dissolved in  $\text{CHCl}_3/\text{PrOH}$  9:1 (0.2 mL). Subsequently, the specified amount of butanal and N-methylmorpholine (3 mol%, 15  $\mu\text{mol}$ , 1.65  $\mu\text{L}$ ) and additional  $\text{CHCl}_3/\text{PrOH}$  9:1 were added to a total volume of 1 mL. The resulting mixture was sonicated until a homogeneous solution was obtained and transferred into a 5 mL round bottom flask that was equipped with the IR probe. A water bath with circulator was used to keep the temperature of the reaction mixture constant at 20 °C during the measurement ( $\pm 0.1$  °C).

**General Procedure to determine the rate-order of nitrostyrene:** A volumetric flask (1 mL) was charged with the peptide TFA salt (3 mol%, 15  $\mu\text{mol}$ ) and the specified amount of (*E*)-nitrostyrene. The mixture was dissolved in  $\text{CHCl}_3/\text{PrOH}$  9:1 (0.2 mL). Subsequently, butanal (135.2  $\mu\text{L}$ , 1.5 mmol) and N-methylmorpholine (3 mol%, 15  $\mu\text{mol}$ , 1.65  $\mu\text{L}$ ) and additional  $\text{CHCl}_3/\text{PrOH}$  9:1 were added to a total volume of 1 mL. The resulting mixture was sonicated until a homogeneous solution was obtained and transferred into a 5 mL round bottom flask that was equipped with the IR probe. A water bath with circulator was used to keep the temperature of the reaction mixture constant at 20 °C during the measurements ( $\pm 0.1$  °C).

**General Procedure to determine the activation energy:** A volumetric flask (1 mL) was charged with the peptide TFA salt (3 mol%, 15  $\mu\text{mol}$ ) and (*E*)-nitrostyrene (74.6 mg, 0.5 mmol, 1 equiv.). The mixture was dissolved in  $\text{CHCl}_3/\text{PrOH}$  9:1 (0.2 mL). Subsequently, butanal (135.2  $\mu\text{L}$ , 1.5 mmol, 3 equiv.) and N-methylmorpholine (3 mol%, 15  $\mu\text{mol}$ , 1.65  $\mu\text{L}$ ) and additional  $\text{CHCl}_3/\text{PrOH}$  9:1 were added to a total volume of 1 mL. The resulting mixture was sonicated until a homogeneous solution was obtained and transferred into a 5 mL round bottom flask that was equipped with the IR probe. A water bath with circulator was used to keep the specified temperature of the reaction mixture constant during the measurements ( $\pm 0.1$  °C).

**Data Treatment:** Initial rates  $k_{obs}$  and corresponding standard errors (SE) were determined by fitting a linear regression model ( $f(x) = intercept + k_{obs} \cdot x$ ) to the ReactIR data using the function fitlm in Matlab (The MathWorks, Inc).

In order to determine the activation energy, the natural logarithm of all corresponding initial rates were plotted against  $1/T$  ('Arrhenius plot') and fitted to a linear regression model ( $f(x) = intercept + slope \cdot x$ ) using the function fitlm in Matlab. In order to account for the error of the initial rates, the observations were weighted according to the normalized standard error: ( $weight = \frac{1}{SE/k_{obs}}$ ) resulting in lower weights for initial rates with high relative error and vice versa. The activation energy was calculated according to the following formula:  $E_A = slope * -R$ . Here, R refers to the ideal gas constant. The error of the activation energy was calculated according to the following formula:  $Error_{E_A} = SE_{slope} * -R$ .

In order to determine the rate order, the logarithm of all corresponding initial rates were plotted against the logarithm of the concentration of the respective component (butanal or nitrostyrene) and fitted to the linear regression model ( $f(x) = intercept + rate\_order \cdot x$ ) using the function fitlm in Matlab. In order to account for the error of the initial rates, the observations were weighted according to the normalized standard error: ( $weight = \frac{1}{SE/k_{obs}}$ ) resulting in lower weights for initial rates with high relative error and vice versa. The slope of the linear fit represents the rate order.

## 5.1 Determination of Rate Orders and Activation Energies Using 3 mol% of Catalysts 2a, 2, 2b and 2c

### Rate Order of Butanal for 2a (3 mol%):

Variation of the butanal concentration ( $c(\text{nitrostyrene}) = 0.5 \text{ M}$ ):

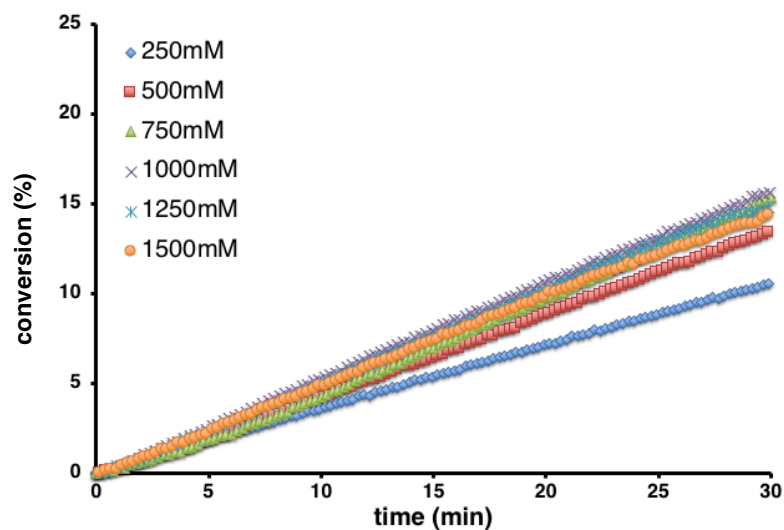

Zero order in butanal at a concentration of  $\geq 750 \text{ mM}$ :

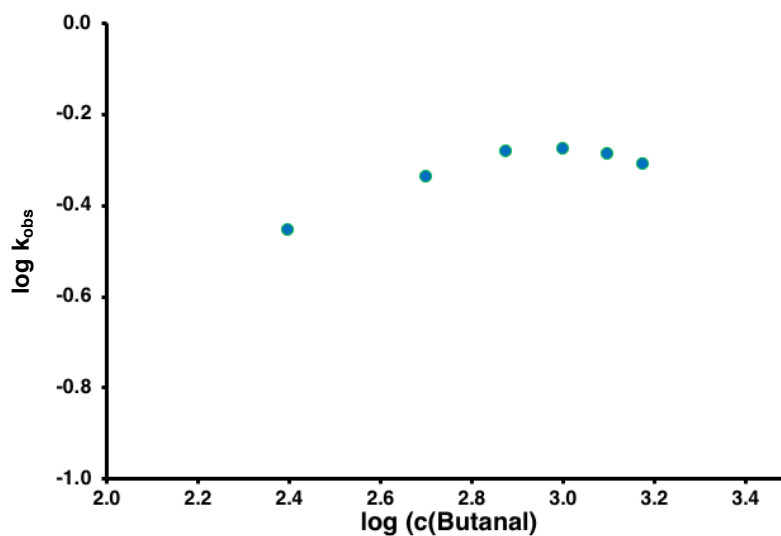

| c(Butanal)<br>(mM) | log (conc) | $k_{\text{obs}}$ | SE of $k_{\text{obs}}$ | $\log(k_{\text{obs}})$ | SE in perc | 1/(SE in perc) |
|--------------------|------------|------------------|------------------------|------------------------|------------|----------------|
| 250                | 2.40       | 0.352            | 0.001                  | -0.453                 | 0.002      | 586.8          |
| 500                | 2.70       | 0.462            | 0.001                  | -0.336                 | 0.002      | 512.8          |
| 750                | 2.88       | 0.524            | 0.003                  | -0.280                 | 0.005      | 209.7          |
| 1000               | 3.00       | 0.533            | 0.001                  | -0.274                 | 0.002      | 591.7          |
| 1250               | 3.10       | 0.516            | 0.001                  | -0.287                 | 0.003      | 397.2          |
| 1500               | 3.18       | 0.491            | 0.001                  | -0.309                 | 0.003      | 377.6          |

### Rate Order of Butanal for 2 (3 mol%):

Variation of the butanal concentration ( $c(\text{nitrostyrene}) = 0.5 \text{ M}$ ):

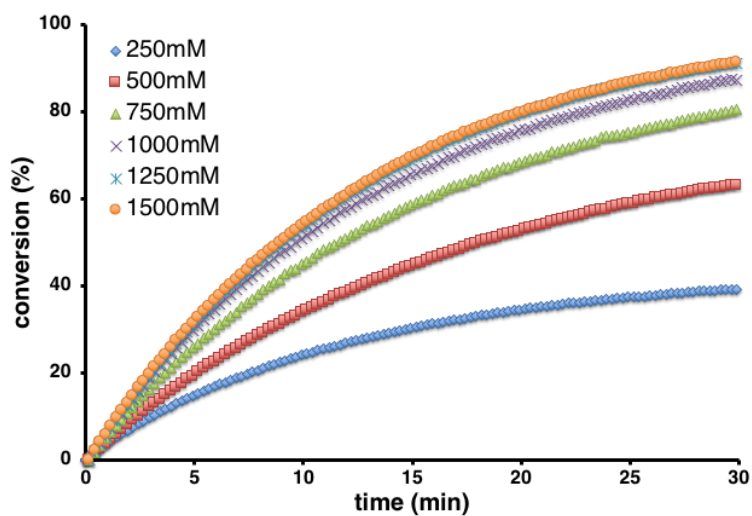

Zero order in butanal at a concentration of  $\geq 1250 \text{ mM}$ :

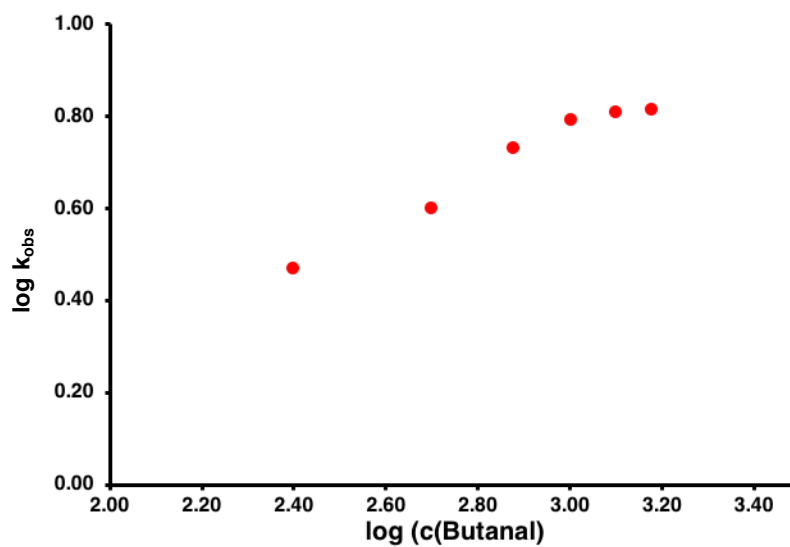

| c(Butanal)<br>(mM) | log (conc) | $k_{\text{obs}}$ | SE of $k_{\text{obs}}$ | $\log(k_{\text{obs}})$ | SE in perc | 1/(SE in perc) |
|--------------------|------------|------------------|------------------------|------------------------|------------|----------------|
| 250                | 2.40       | 2.93             | 0.04                   | 0.466                  | 0.014      | 71.8           |
| 500                | 2.70       | 4.00             | 0.05                   | 0.602                  | 0.012      | 86.5           |
| 750                | 2.88       | 5.34             | 0.07                   | 0.728                  | 0.013      | 79.2           |
| 1000               | 3.00       | 6.15             | 0.08                   | 0.789                  | 0.013      | 79.3           |
| 1250               | 3.10       | 6.42             | 0.07                   | 0.807                  | 0.011      | 93.4           |
| 1500               | 3.18       | 6.49             | 0.08                   | 0.812                  | 0.013      | 76.7           |

### Rate Order of Butanal for 2b (3 mol%):

Variation of the butanal concentration ( $c(\text{nitrostyrene}) = 0.5 \text{ M}$ ):

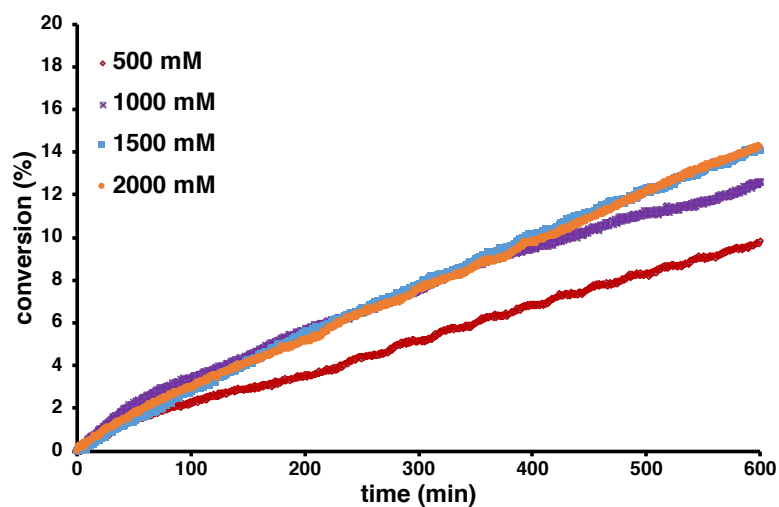

Zero order in butanal at a concentration of  $\geq 1500 \text{ mM}$ :

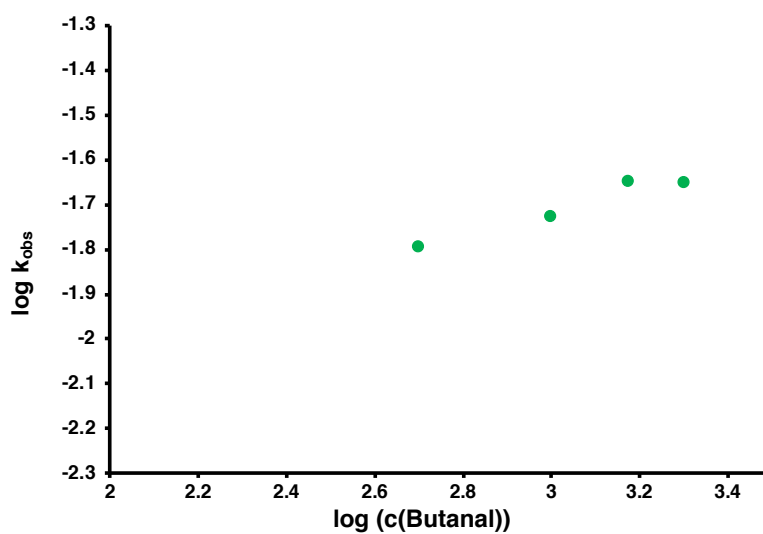

| c(Butanal)<br>(mM) | log (conc) | $k_{\text{obs}}$ | SE of $k_{\text{obs}}$ | $\log(k_{\text{obs}})$ | SE in perc | 1/(SE in perc) |
|--------------------|------------|------------------|------------------------|------------------------|------------|----------------|
| 500                | 2.70       | 0.01596          | 0.00002                | -1.797                 | 0.001      | 798.0          |
| 1000               | 3.00       | 0.01867          | 0.00003                | -1.729                 | 0.002      | 622.3          |
| 1500               | 3.18       | 0.02235          | 0.00002                | -1.651                 | 0.001      | 1117.5         |
| 2000               | 3.30       | 0.02225          | 0.00002                | -1.653                 | 0.001      | 1112.5         |

### Rate Order of Butanal for 2c (3 mol%):

Variation of the butanal concentration ( $c(\text{nitrostyrene}) = 0.5 \text{ M}$ ):

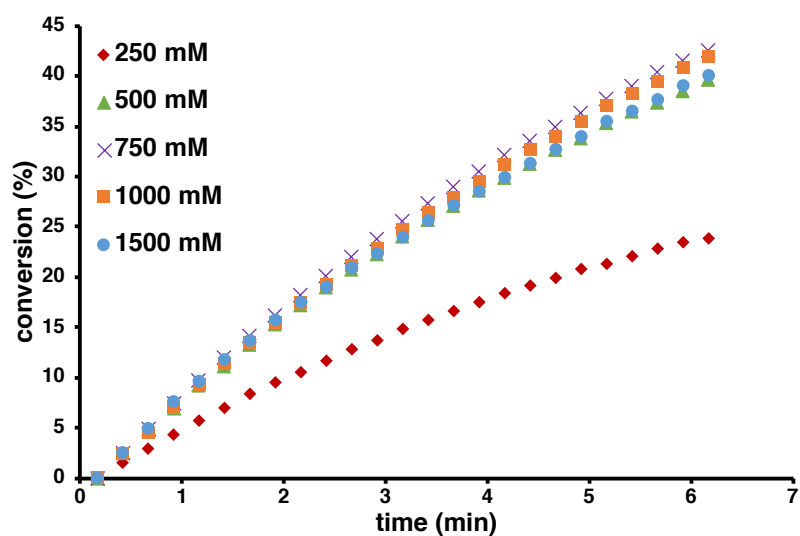

Zero order in butanal at a concentration of  $\geq 500 \text{ mM}$ :

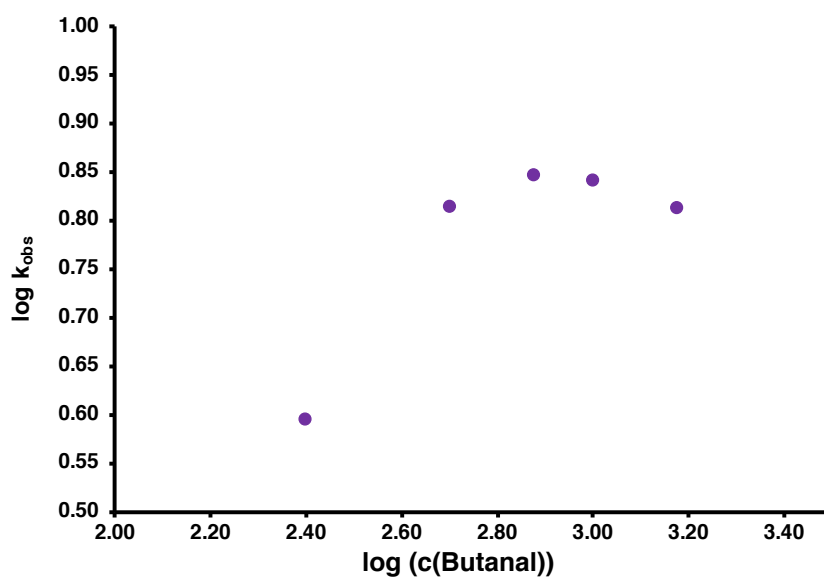

| c(Butanal)<br>(mM) | log (conc) | $k_{\text{obs}}$ | SE of $k_{\text{obs}}$ | $\log(k_{\text{obs}})$ | SE in perc | 1/(SE in perc) |
|--------------------|------------|------------------|------------------------|------------------------|------------|----------------|
| 250                | 2.40       | 3.95             | 0.11                   | 0.596                  | 0.027      | 37.6           |
| 500                | 2.70       | 6.53             | 0.16                   | 0.815                  | 0.024      | 41.3           |
| 750                | 2.88       | 7.05             | 0.16                   | 0.848                  | 0.023      | 44.3           |
| 1000               | 3.00       | 6.95             | 0.14                   | 0.842                  | 0.020      | 50.0           |
| 1500               | 3.18       | 6.51             | 0.15                   | 0.814                  | 0.023      | 42.8           |

### Rate Order of Nitrostyrene for 2a (3 mol%):

Variation of the nitrostyrene concentration ( $c(\text{butanal}) = 1.5 \text{ M}$ ):

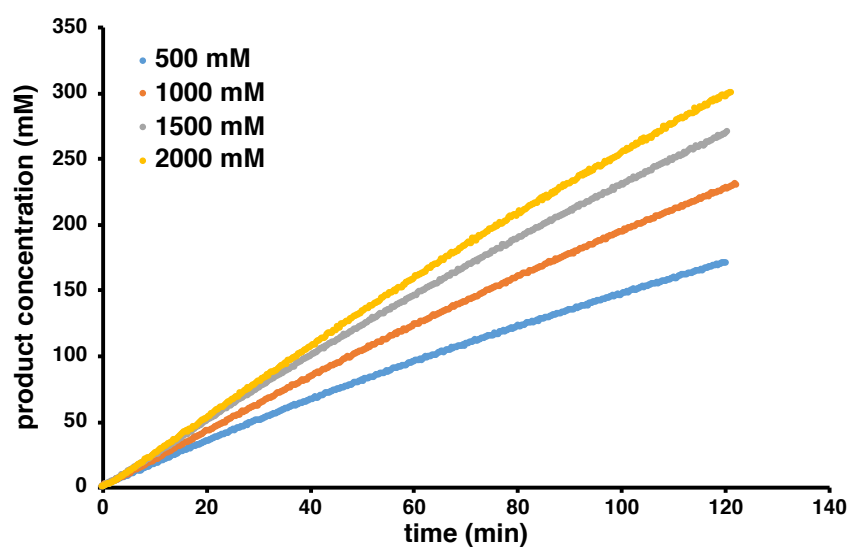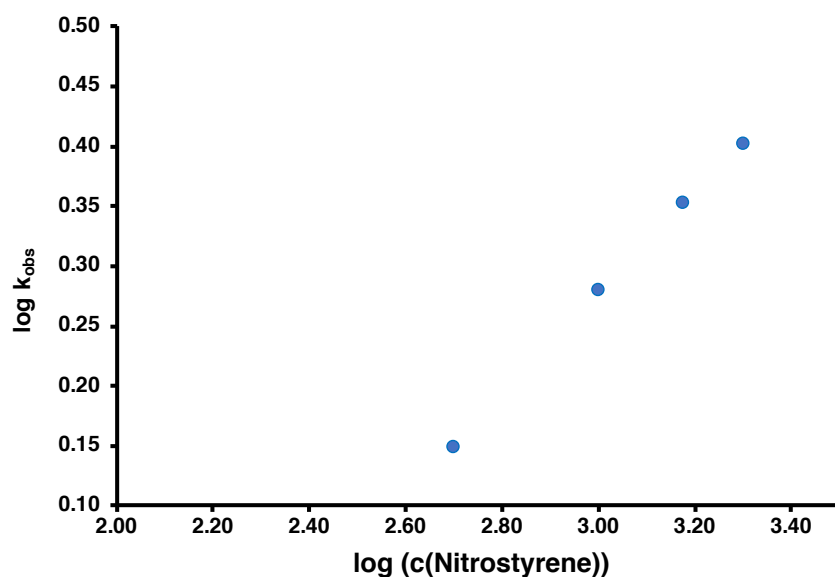

| c(Nitrostyrene)<br>(mM) | log (conc) | $k_{\text{obs}}$ | SE of $k_{\text{obs}}$ | log( $k_{\text{obs}}$ ) | SE in perc | 1/(SE in perc) |
|-------------------------|------------|------------------|------------------------|-------------------------|------------|----------------|
| 500                     | 2.70       | 1.409            | 0.004                  | 0.149                   | 0.003      | 352.3          |
| 1000                    | 3.00       | 1.904            | 0.004                  | 0.280                   | 0.002      | 476.0          |
| 1500                    | 3.18       | 2.253            | 0.005                  | 0.353                   | 0.002      | 450.6          |
| 2000                    | 3.30       | 2.520            | 0.004                  | 0.401                   | 0.002      | 630.0          |

rate order of nitrostyrene:  $0.42 \pm 0.01$ .



## Rate Order of Nitrostyrene for 2 (3 mol%):

Variation of the nitrostyrene concentration ( $c(\text{butanal}) = 1.5 \text{ M}$ ):

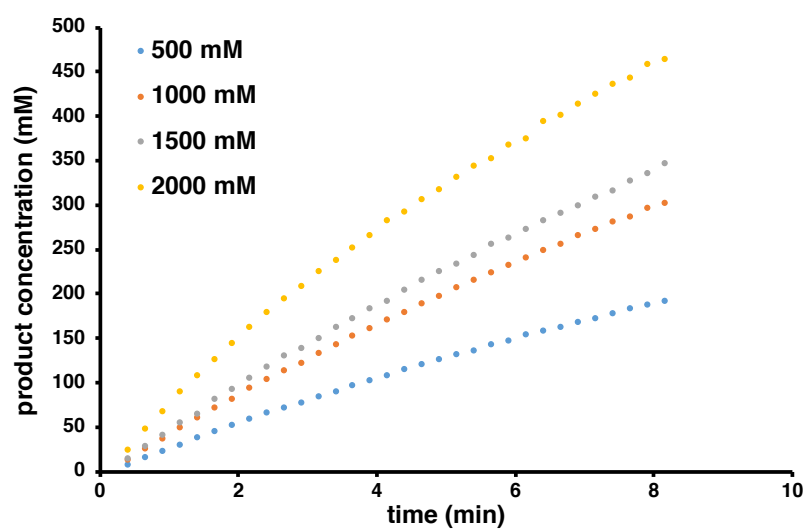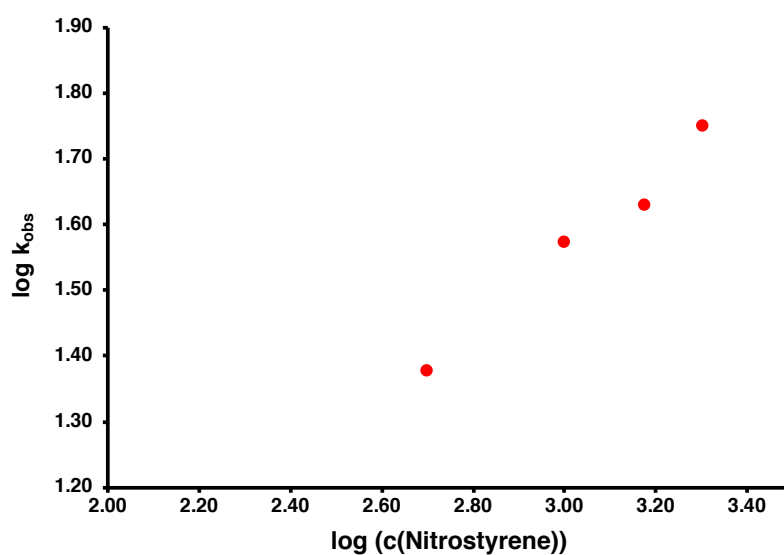

| c(Nitrostyrene)<br>(mM) | log (conc) | $k_{\text{obs}}$ | SE of $k_{\text{obs}}$ | $\log(k_{\text{obs}})$ | SE in perc | 1/(SE in perc) |
|-------------------------|------------|------------------|------------------------|------------------------|------------|----------------|
| 500                     | 2.70       | 23.76            | 0.30                   | 1.376                  | 0.012      | 80.3           |
| 1000                    | 3.00       | 37.41            | 0.46                   | 1.573                  | 0.012      | 81.5           |
| 1500                    | 3.18       | 42.45            | 0.52                   | 1.628                  | 0.012      | 81.2           |
| 2000                    | 3.30       | 56.19            | 1.13                   | 1.750                  | 0.020      | 49.8           |

rate order of nitrostyrene:  $0.58 \pm 0.07$ .

### Rate Order of Nitrostyrene for 2b (3 mol%):

Variation of the nitrostyrene concentration (c(butanal) = 1.5 M):

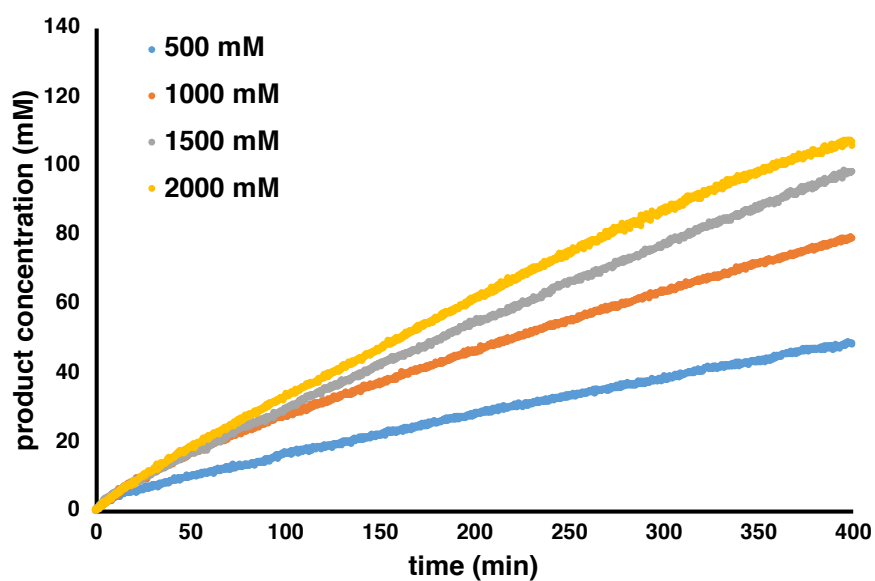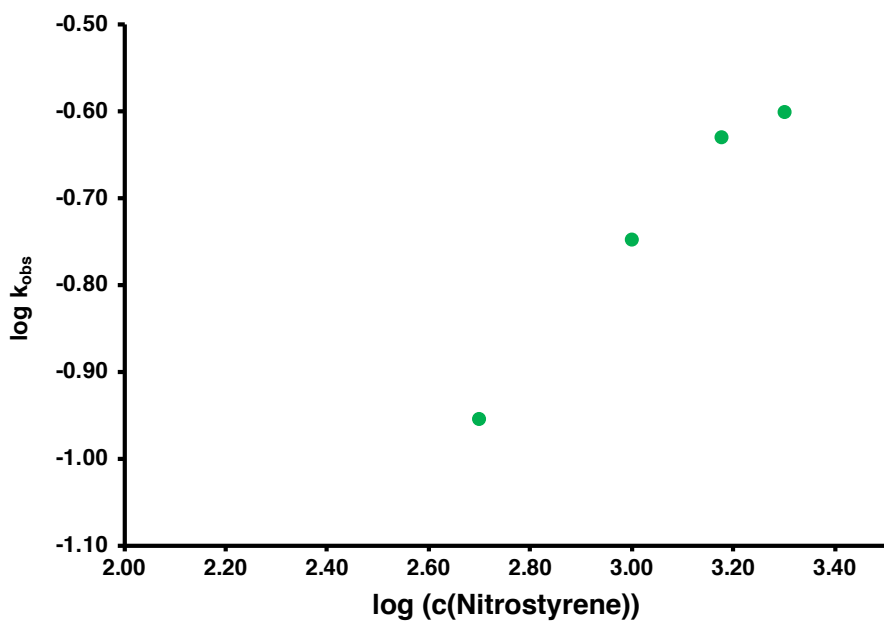

| c(Nitrostyrene)<br>(mM) | log (conc) | $k_{obs}$ | SE of $k_{obs}$ | $\log(k_{obs})$ | SE in perc | 1/(SE in perc) |
|-------------------------|------------|-----------|-----------------|-----------------|------------|----------------|
| 500                     | 2.70       | 0.1111    | 0.0001          | -0.954          | 0.001      | 1111.0         |
| 1000                    | 3.00       | 0.1787    | 0.0003          | -0.748          | 0.002      | 595.7          |
| 1500                    | 3.18       | 0.2342    | 0.0002          | -0.630          | 0.001      | 1171.0         |
| 2000                    | 3.30       | 0.2502    | 0.0005          | -0.602          | 0.002      | 500.4          |

rate order of nitrostyrene:  $0.63 \pm 0.05$ .

### Rate Order of Nitrostyrene for 2c (3 mol%):

Variation of the nitrostyrene concentration (c(butanal) = 1.5 M):

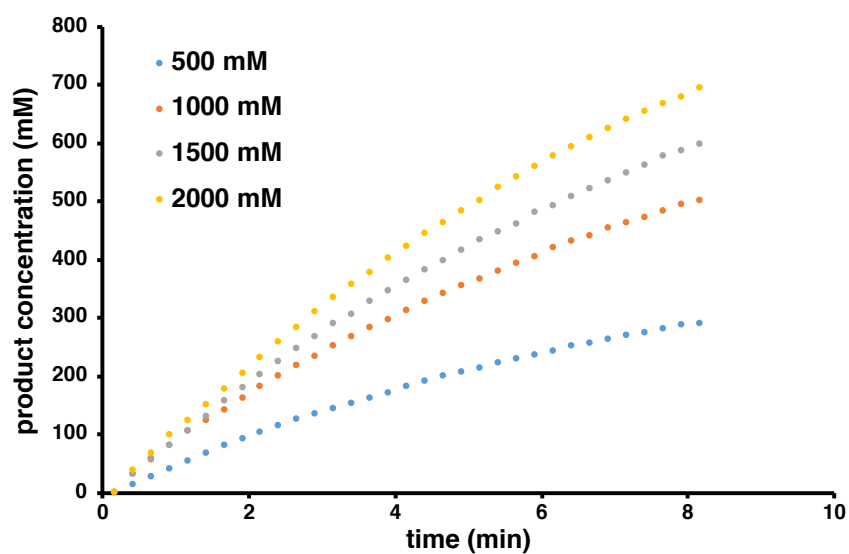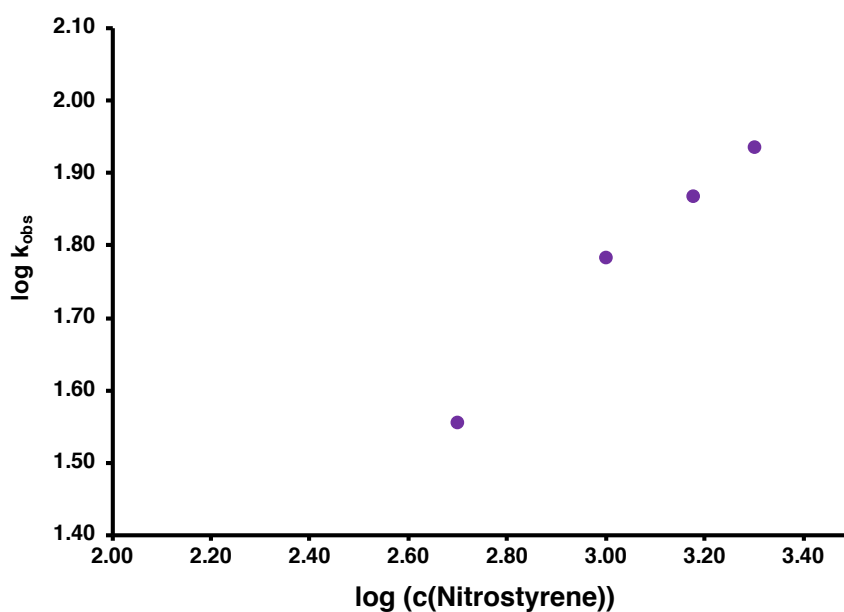

| c(Nitrostyrene)<br>(mM) | log (conc) | $k_{obs}$ | SE of $k_{obs}$ | $\log(k_{obs})$ | SE in perc | 1/(SE in perc) |
|-------------------------|------------|-----------|-----------------|-----------------|------------|----------------|
| 500                     | 2.70       | 35.78     | 0.85            | 1.554           | 0.024      | 41.9           |
| 1000                    | 3.00       | 60.63     | 1.40            | 1.783           | 0.023      | 43.4           |
| 1500                    | 3.18       | 73.69     | 1.51            | 1.867           | 0.021      | 48.7           |
| 2000                    | 3.30       | 86.02     | 1.76            | 1.935           | 0.020      | 48.9           |

rate order of nitrostyrene:  $0.63 \pm 0.05$ .

## Activation Energy of 2a:

Variation of the temperature (c(nitrostyrene)= 0.5 M, c(butanal)= 1.5 M):

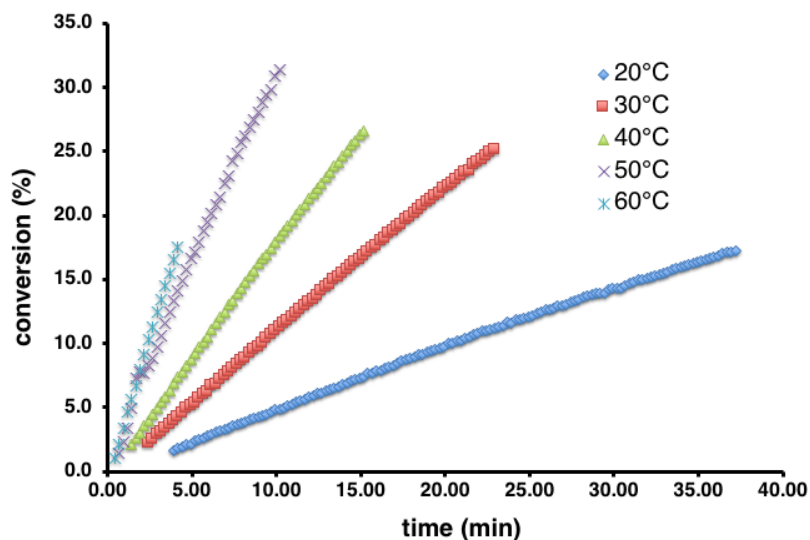

Arrhenius Plot:

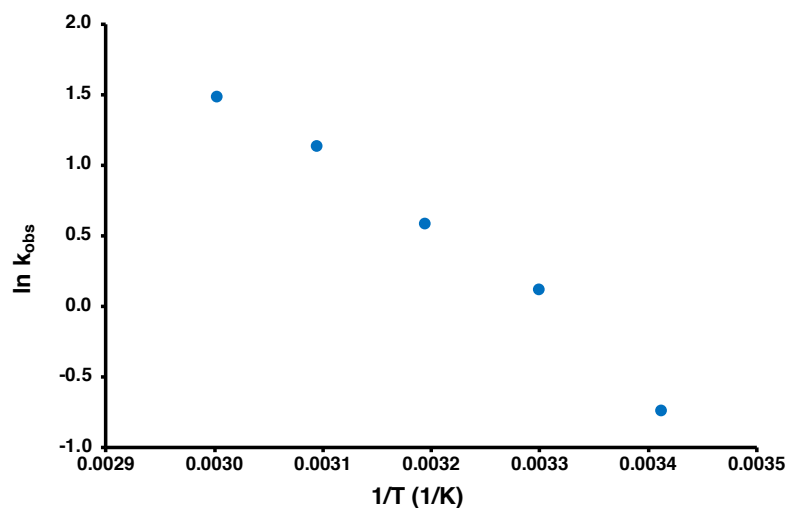

| T (°C) | T (K)  | 1/T    | $k_{obs}$ | SE of $k_{obs}$ | $\ln(k_{obs})$ | SE in perc | 1/(SE in perc) |
|--------|--------|--------|-----------|-----------------|----------------|------------|----------------|
| 20     | 293.15 | 0.0034 | 0.476     | 0.002           | -0.7423        | 0.0042     | 238.0          |
| 30     | 303.15 | 0.0033 | 1.126     | 0.002           | 0.1187         | 0.0018     | 563.0          |
| 40     | 313.15 | 0.0032 | 1.799     | 0.006           | 0.5872         | 0.0033     | 299.8          |
| 50     | 323.15 | 0.0031 | 3.121     | 0.024           | 1.1382         | 0.0077     | 130.0          |
| 60     | 333.15 | 0.0030 | 4.427     | 0.031           | 1.4877         | 0.0070     | 142.8          |

Slope of the Arrhenius plot:  $-5446.7 \pm 600.3$  K, activation energy:  $10.8 \pm 1.2$  kcal/mol.

## Activation Energy of 2:

Variation of the temperature (c(nitrostyrene) = 0.5 M, c(butanal) = 1.5 M):

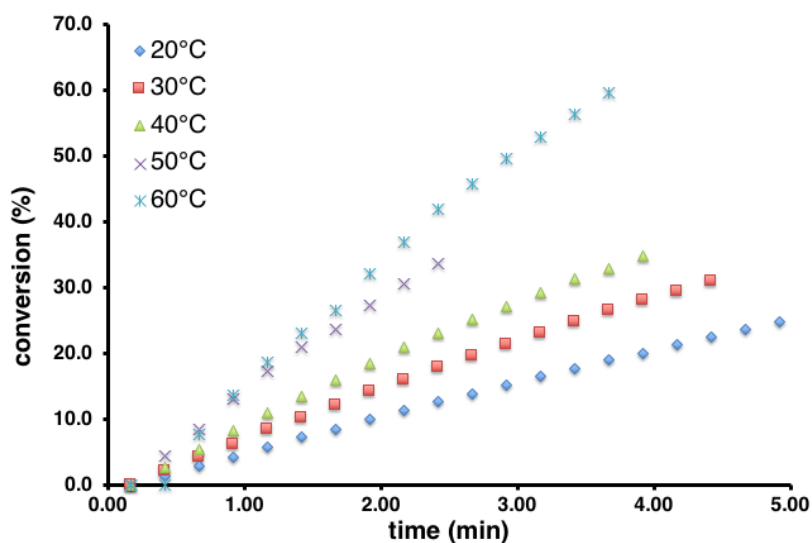

Arrhenius Plot:

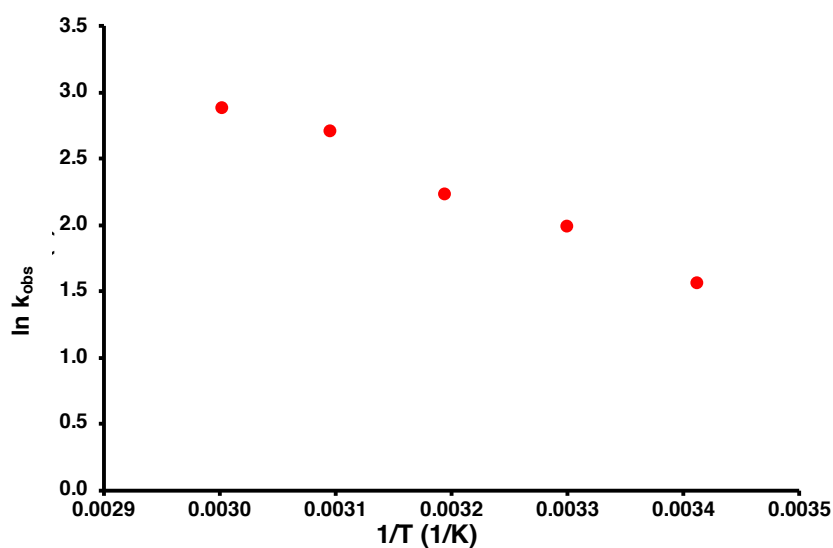

| T (°C) | T (K)  | 1/T    | k <sub>obs</sub> | SE of k <sub>obs</sub> | ln(k <sub>obs</sub> ) | SE in perc | 1/(SE in perc) |
|--------|--------|--------|------------------|------------------------|-----------------------|------------|----------------|
| 20     | 293.15 | 0.0034 | 4.77             | 0.06                   | 1.5621                | 0.0128     | 78.2           |
| 30     | 303.15 | 0.0033 | 7.32             | 0.10                   | 1.9901                | 0.0134     | 74.7           |
| 40     | 313.15 | 0.0032 | 9.33             | 0.18                   | 2.2330                | 0.0197     | 50.7           |
| 50     | 323.15 | 0.0031 | 14.98            | 0.40                   | 2.7065                | 0.0268     | 37.3           |
| 60     | 333.15 | 0.0030 | 17.93            | 0.42                   | 2.8865                | 0.0236     | 42.3           |

Slope of the Arrhenius plot:  $-3375.2 \pm 234.2$  K, activation energy:  $6.7 \pm 0.5$  kcal/mol.

### Activation Energy of 2b:

Variation of the temperature (c(nitrostyrene) = 0.5 M, c(butanal) = 1.5 M):

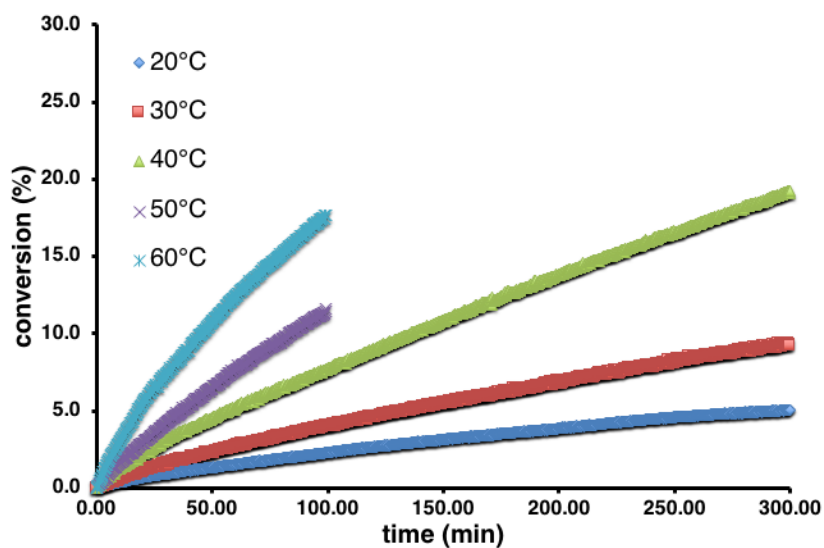

Arrhenius Plot:

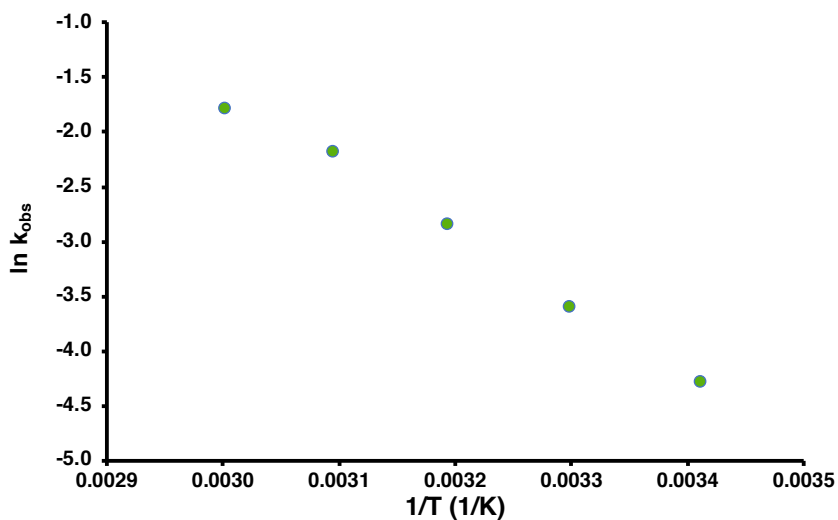

| T (°C) | T (K)  | 1/T    | k <sub>obs</sub> | SE of k <sub>obs</sub> | ln(k <sub>obs</sub> ) | SE in perc | 1/(SE in perc) |
|--------|--------|--------|------------------|------------------------|-----------------------|------------|----------------|
| 20     | 293.15 | 0.0034 | 0.0138           | 0.0001                 | -4.2831               | 0.0044     | 226.2          |
| 30     | 303.15 | 0.0033 | 0.0273           | 0.0001                 | -3.6009               | 0.0026     | 390.0          |
| 40     | 313.15 | 0.0032 | 0.0584           | 0.0001                 | -2.8404               | 0.0015     | 687.1          |
| 50     | 323.15 | 0.0031 | 0.1129           | 0.0004                 | -2.1813               | 0.0034     | 297.9          |
| 60     | 333.15 | 0.0030 | 0.1687           | 0.0010                 | -1.7796               | 0.0057     | 176.1          |

Slope of the Arrhenius plot:  $-6560.1 \pm 418.7$  K, activation energy:  $13.0 \pm 0.8$  kcal/mol.

## 5.2 Kinetic Profiles Using 1 mol% of Catalysts 2a, 2 and 2b

The *in situ* IR experiments were also performed using previously established standard reaction conditions for the tripeptide catalyzed conjugate addition reaction (1 mol% peptide TFA salt, 1 mol% NMM, 1 equiv. nitrostyrene (0.5 M), 1.5 equiv. butanal (0.75 M)).<sup>3,4</sup>

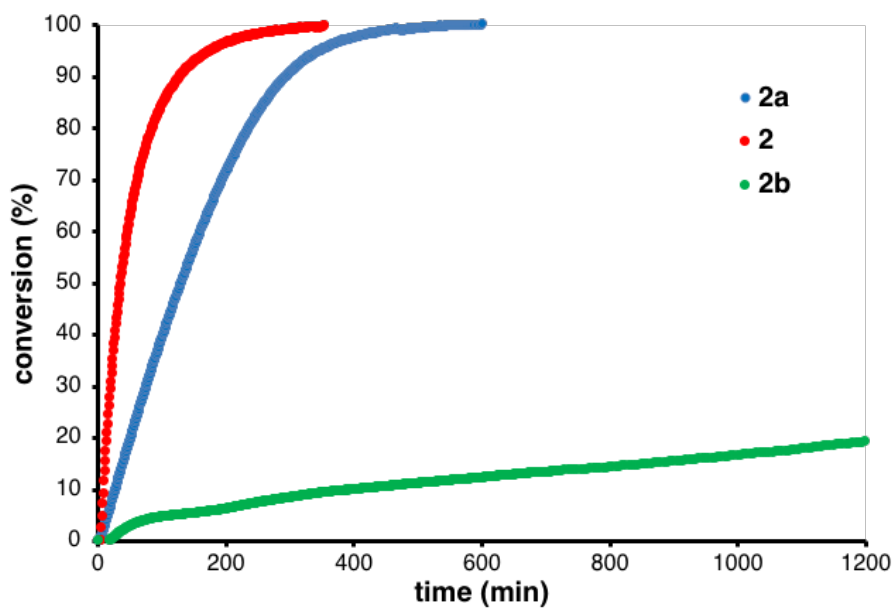

### 5.3 Kinetic Profiles Using 3 mol% of Catalysts **1a**, **1** and **1b**

The *in situ* IR experiments were also performed with the catalysts H-D<sub>2</sub>Aze-Pro-Glu-NH<sub>2</sub> **1a**, H-D<sub>2</sub>Pro-Pro-Glu-NH<sub>2</sub> **1** and H-D<sub>2</sub>Pip-Pro-Glu-NH<sub>2</sub> **1b** using the same reaction conditions as for **2a**, **2** and **2b** (3 mol% peptide TFA salt, 3 mol% NMM, 1 equiv. nitrostyrene (0.5 M), 3 equiv. butanal (1.5 M)).

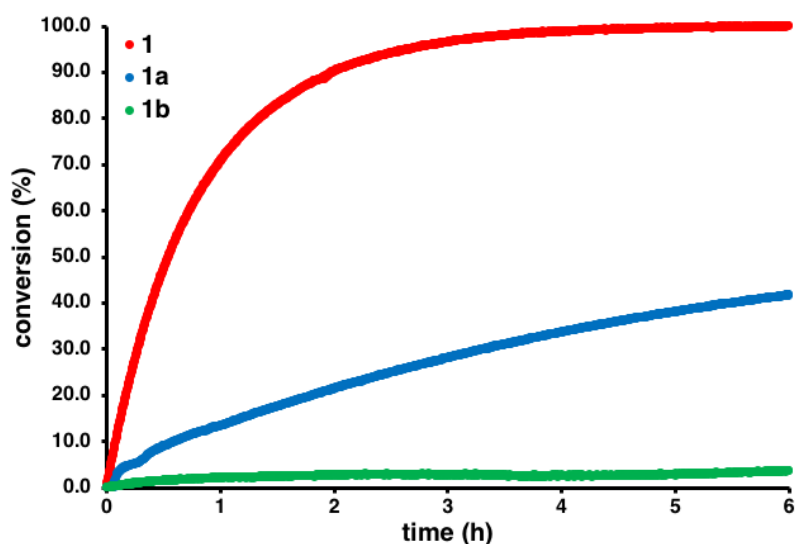



**6. NMR Spectra of the Peptides in CDCl<sub>3</sub>/CD<sub>3</sub>OH 9:1**  
**TFA-salt of H-DAze-Pro-Glu-NH<sub>2</sub> 1a**

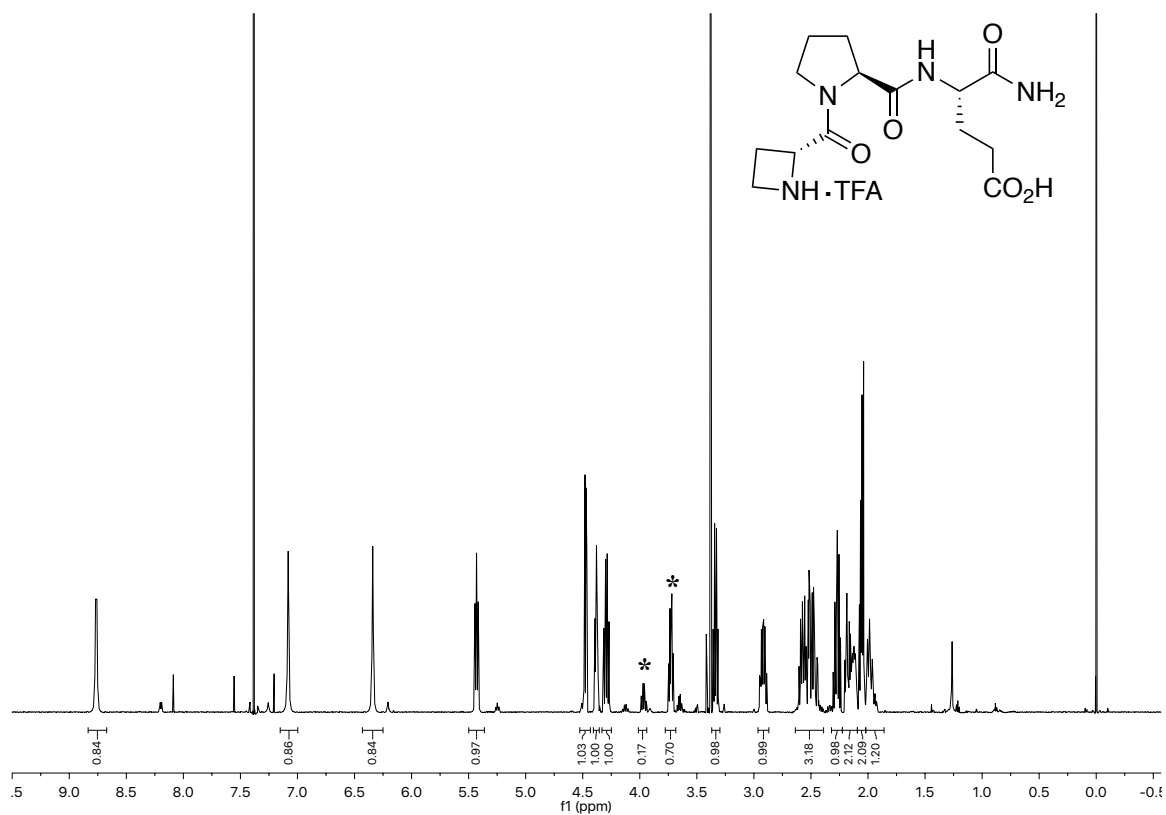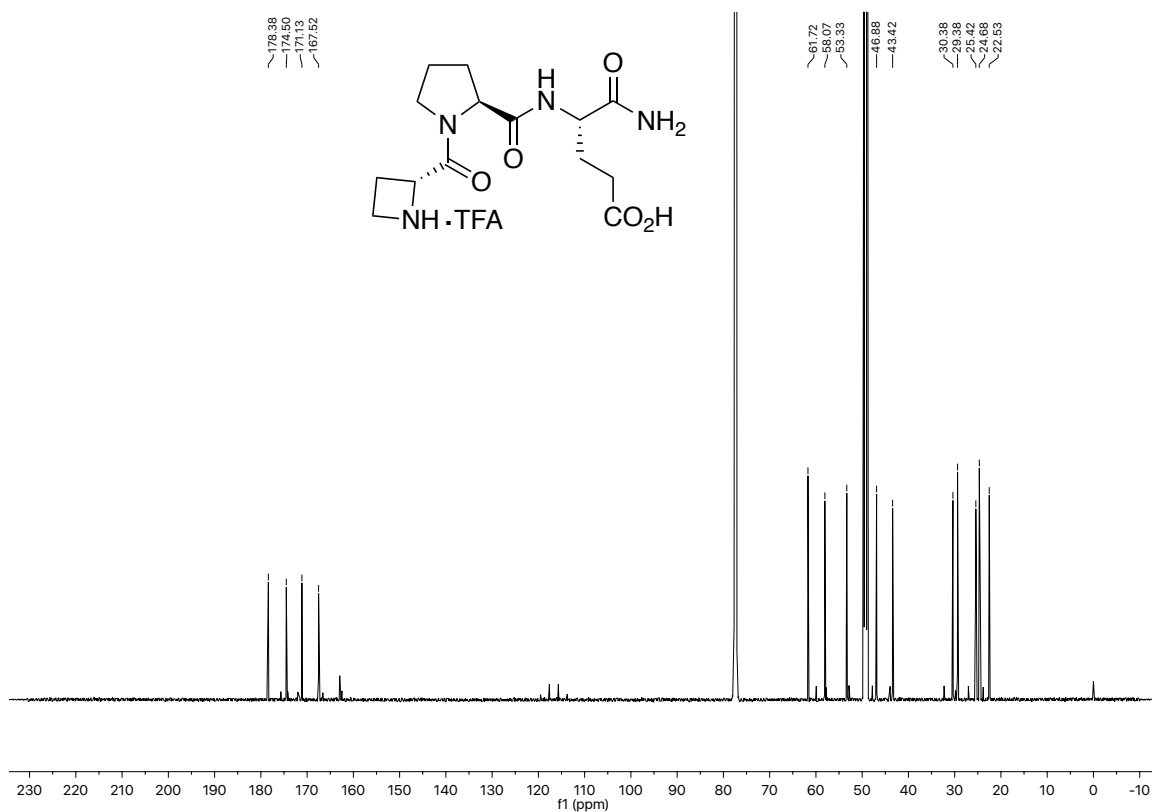

\* Reduced signal intensity due to solvent (CD<sub>3</sub>OH) suppression.

TFA-salt of H-DPip-Pro-Glu-NH<sub>2</sub> **1b**

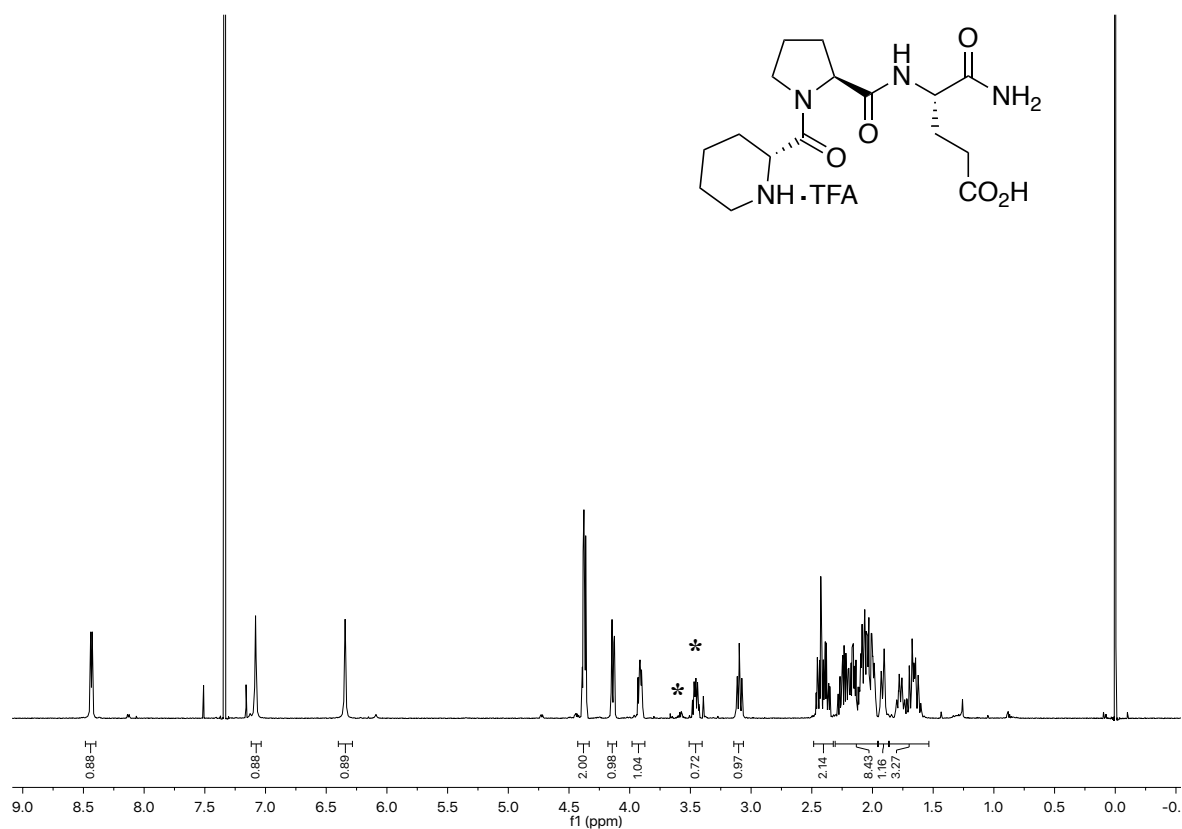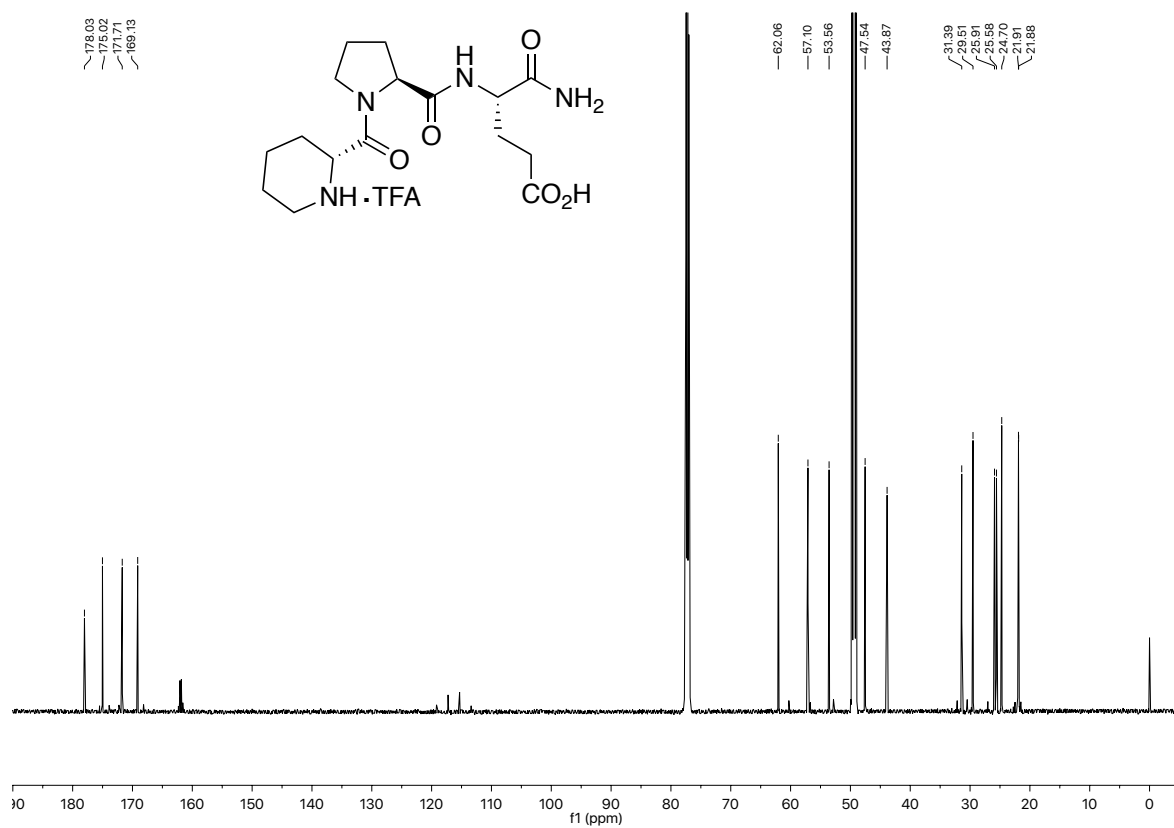

\* Reduced signal intensity due to solvent (CD<sub>3</sub>OH) suppression.

TFA-salt of H-DAze-Pip-Glu-NH<sub>2</sub> **2a**

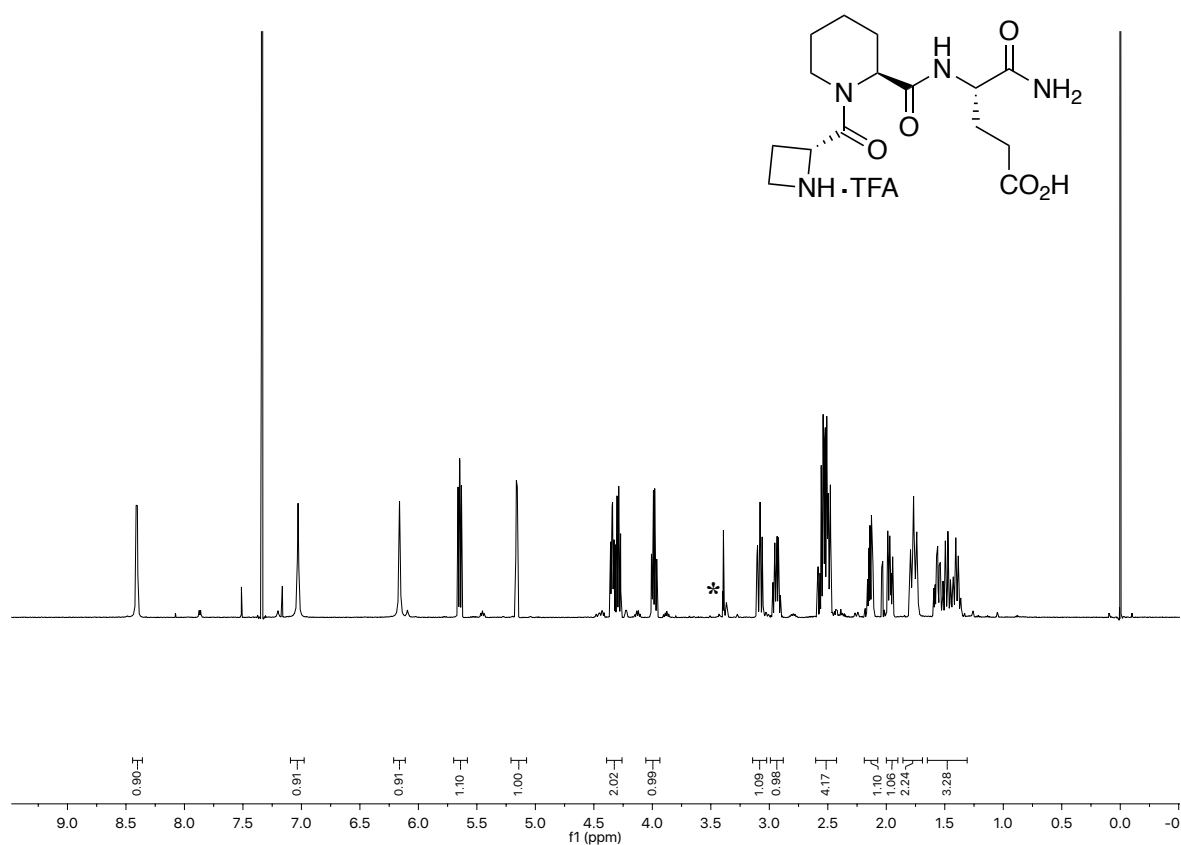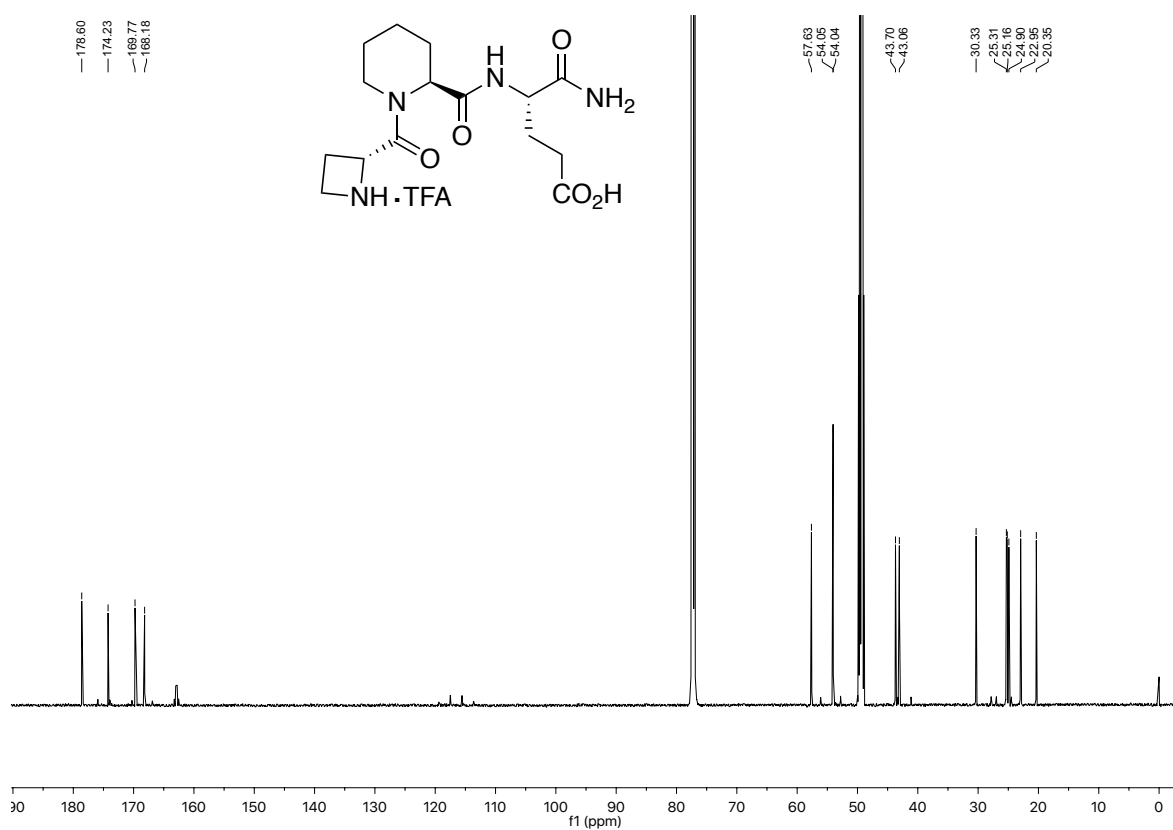

\* Reduced signal intensity due to solvent (CD<sub>3</sub>OH) suppression.

TFA-salt of H-DPip-Pip-Glu-NH<sub>2</sub> **2b**

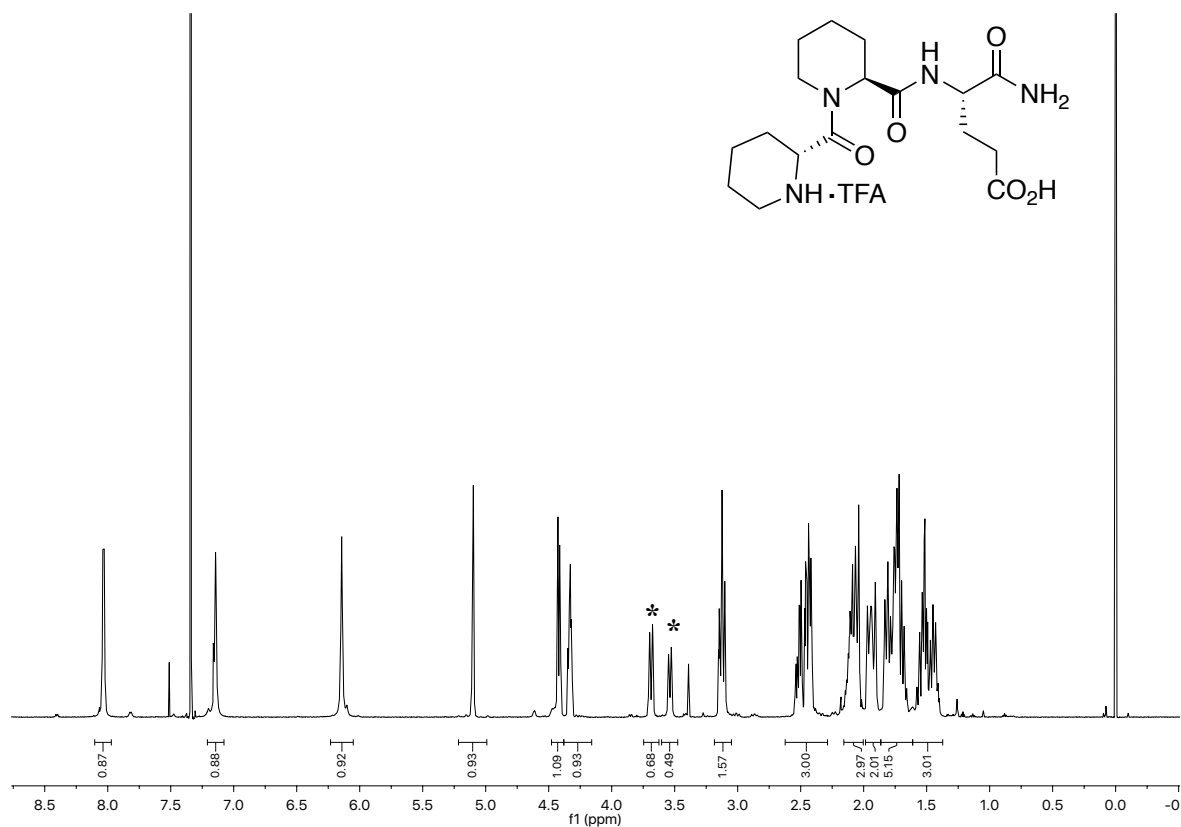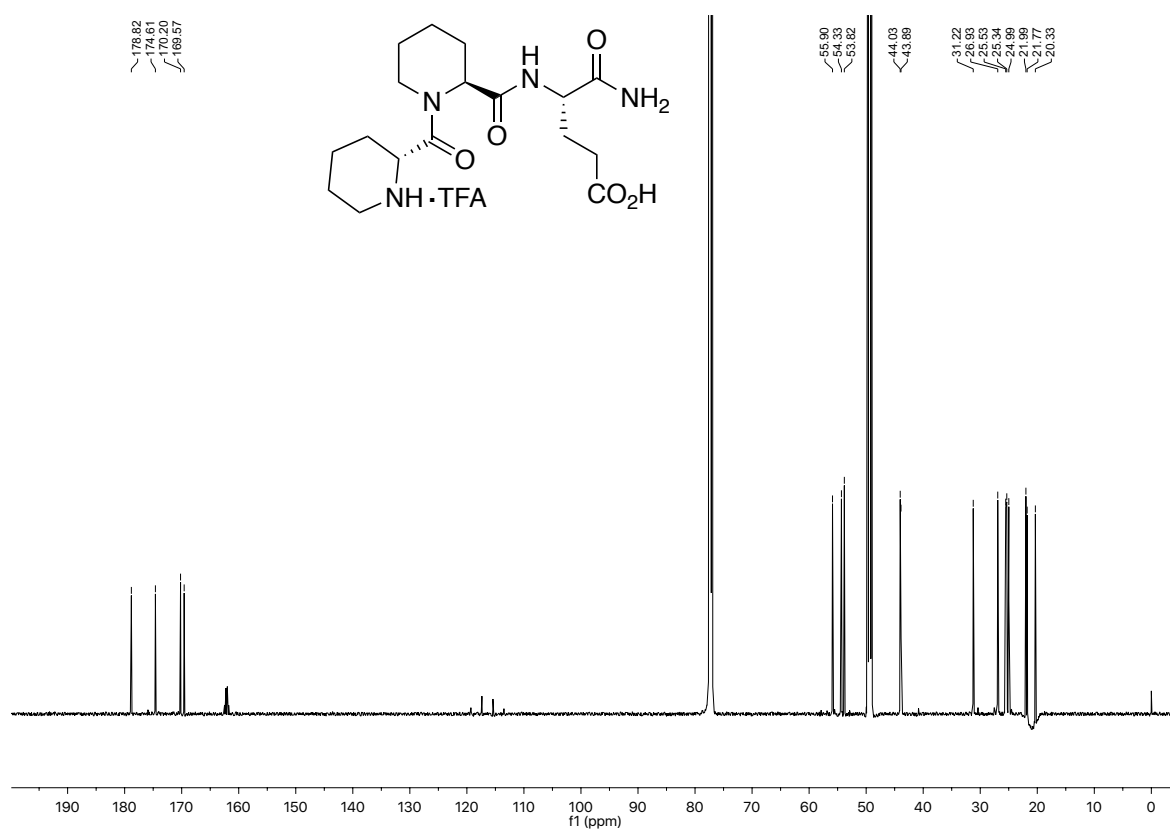

\* Reduced signal intensity due to solvent (CD<sub>3</sub>OH) suppression.

TFA-salt of H-MetPro-DPip-DGlu-NH<sub>2</sub> **2c**

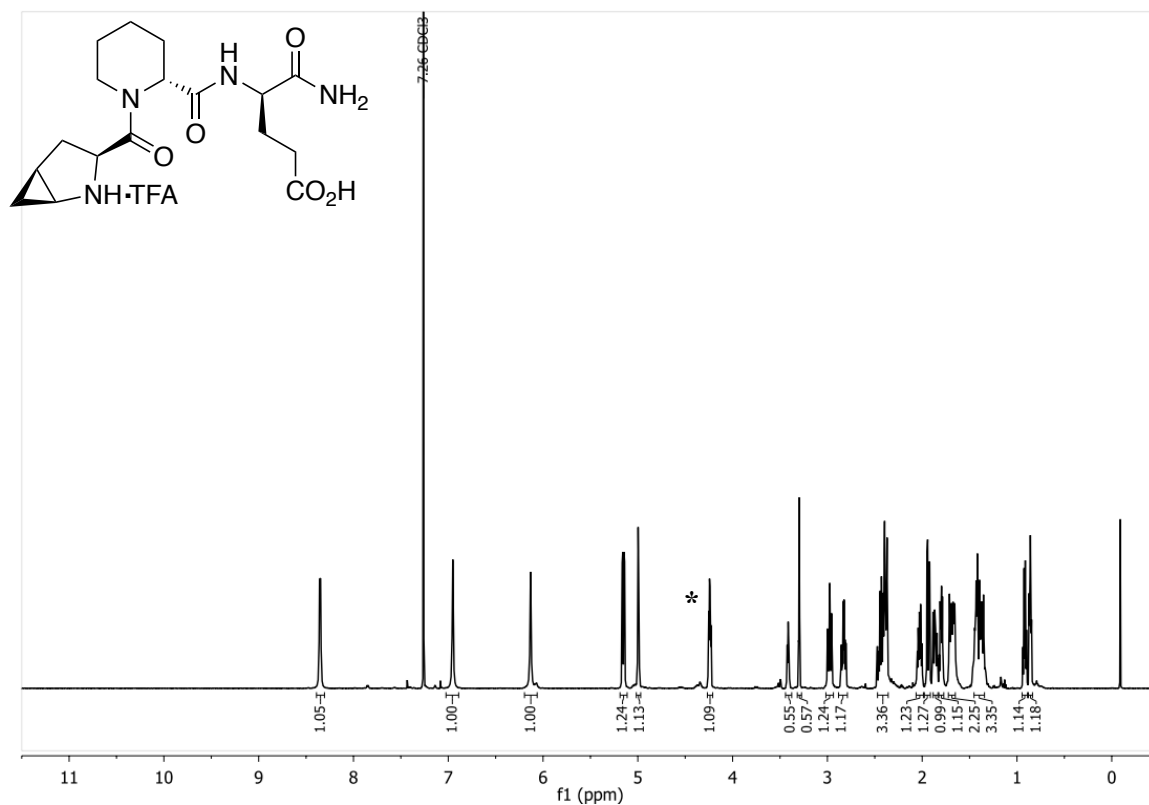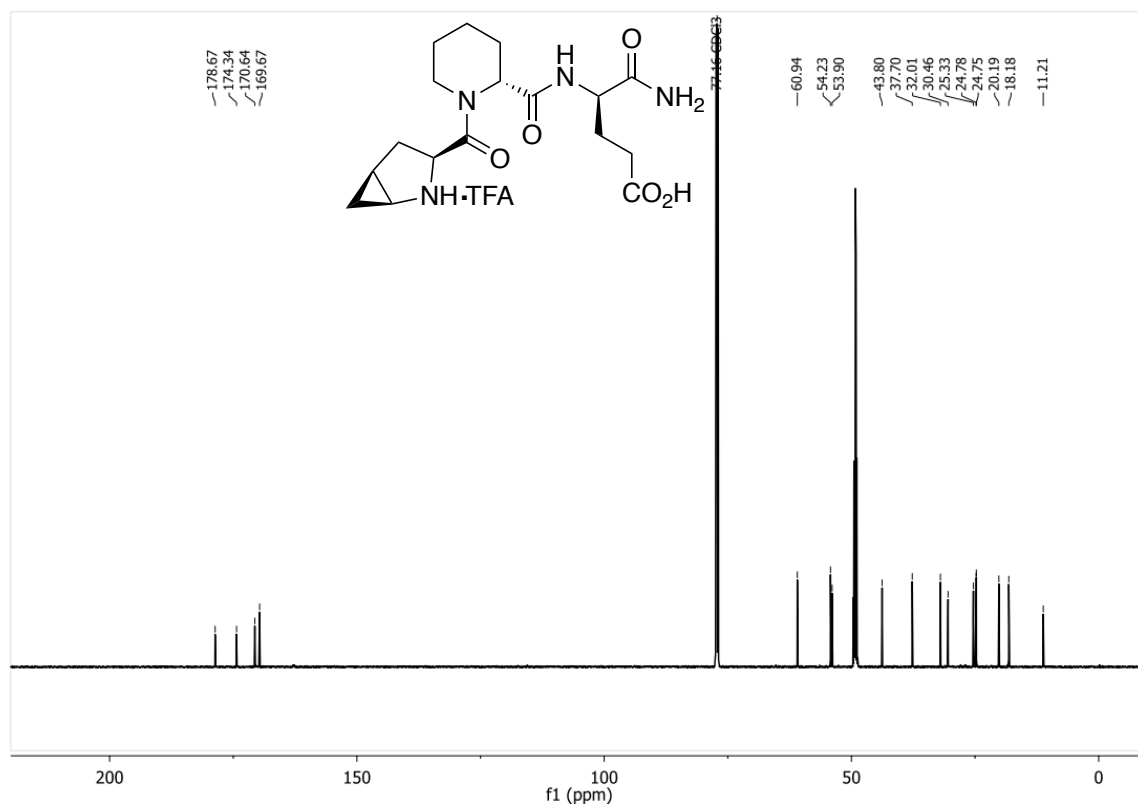

\* Reduced signal intensity due to solvent (CD<sub>3</sub>OH) suppression.

## 7. ROESY Spectra of the TFA-salts of 2a, 2, and 2b in CDCl<sub>3</sub>/CD<sub>3</sub>OH 9:1

Only non-vicinal NOEs are indicated with arrows.

H-dAze-Pip-Glu-NH<sub>2</sub> **2a**

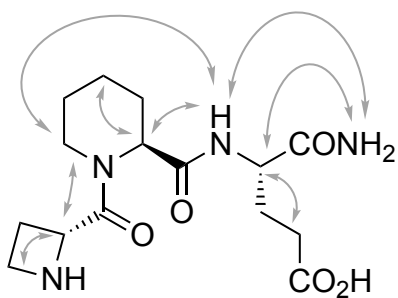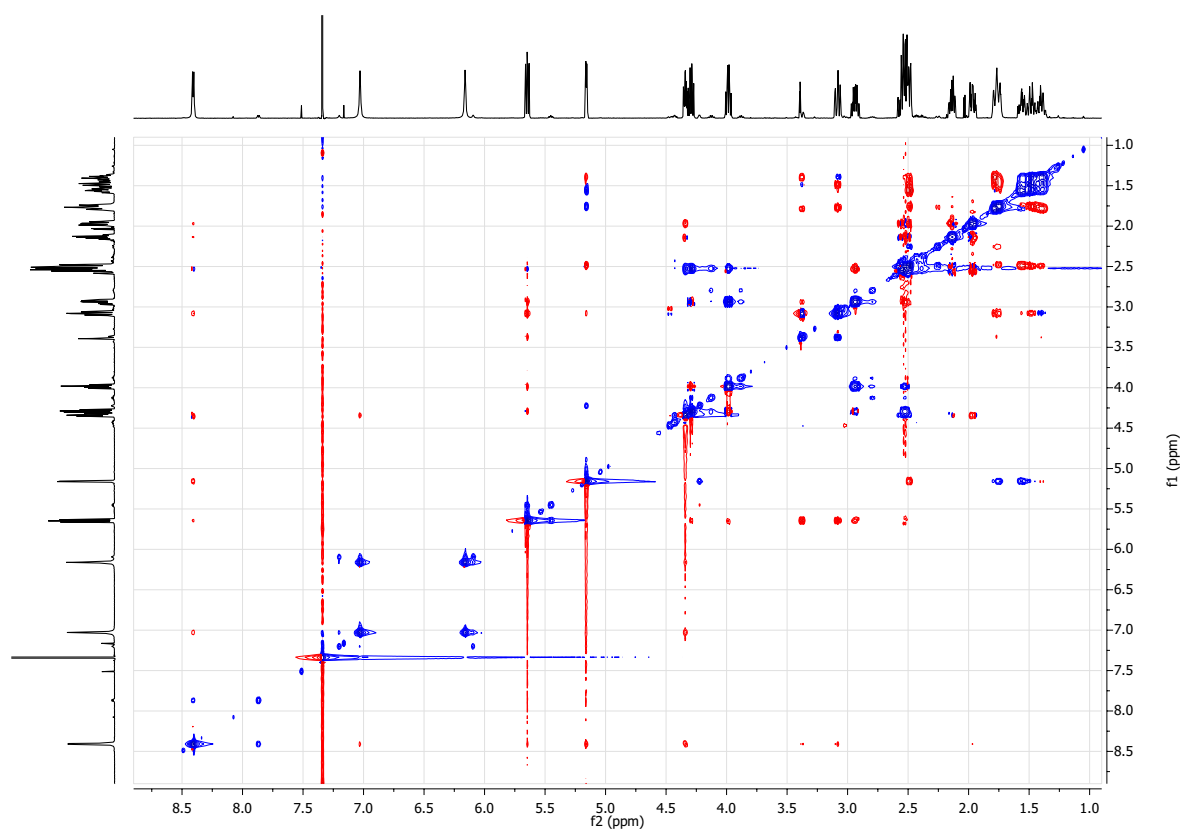

H-DPro-Pip-Glu-NH<sub>2</sub> 2

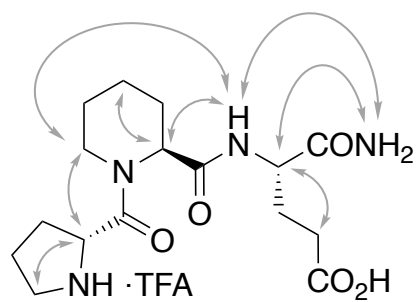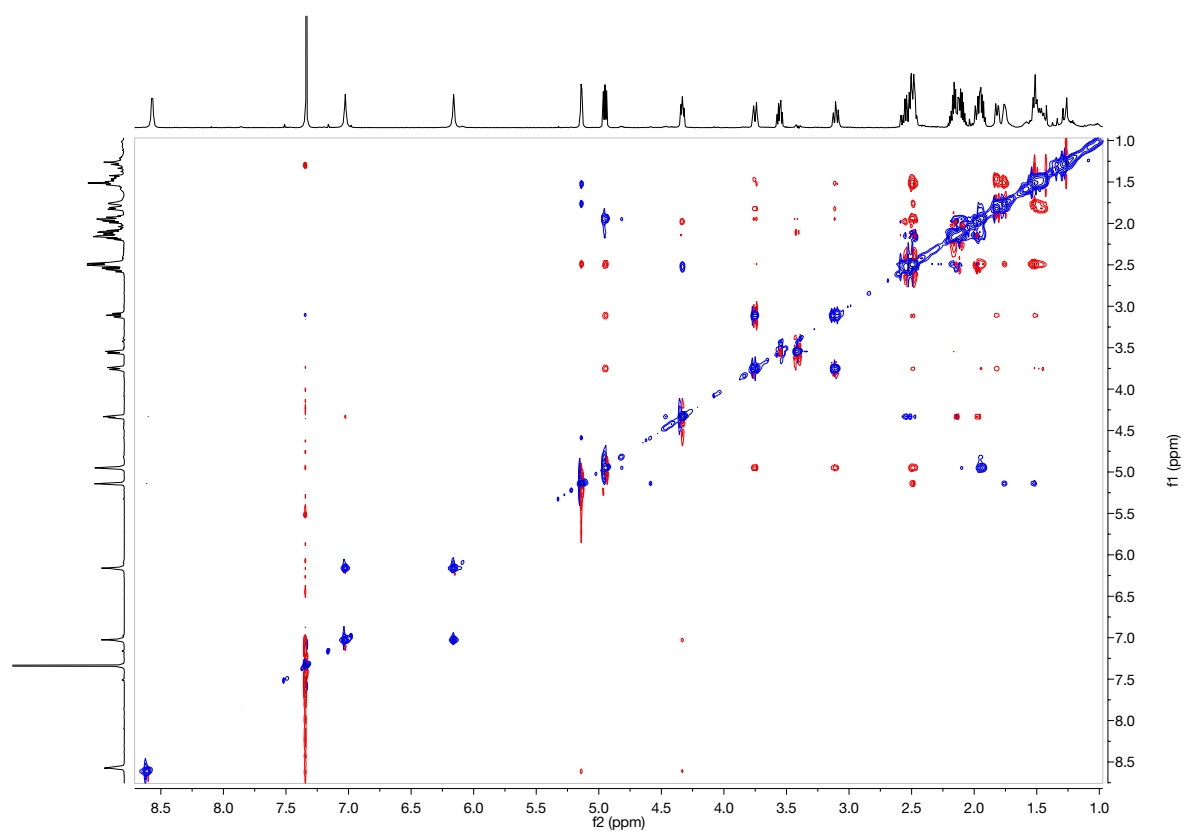

Spectrum taken from ref. 4

H-dAze-Pip-Glu-NH<sub>2</sub> **2b**

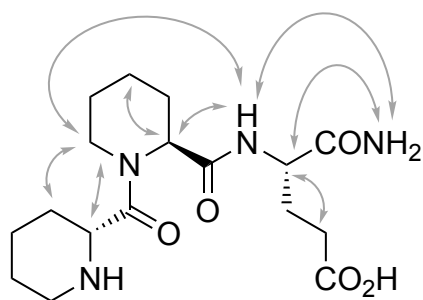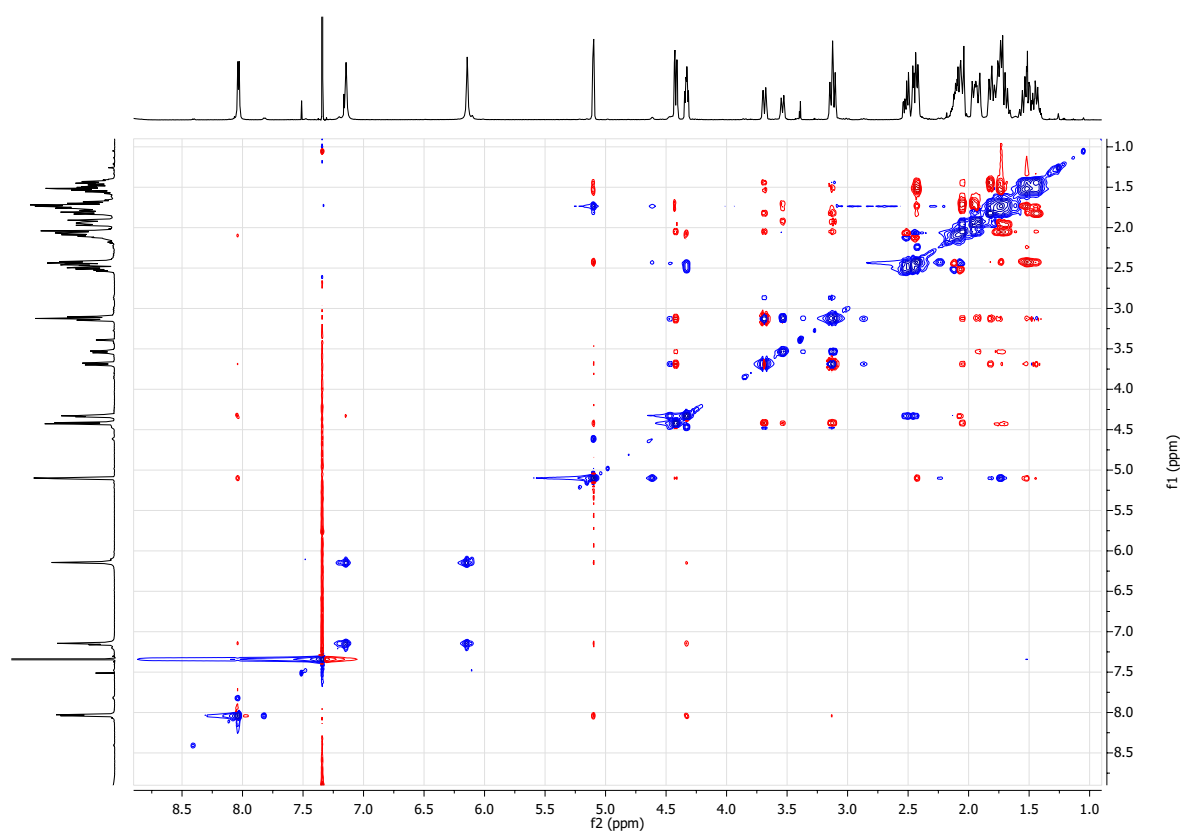



## 8. References

1. E. Kaiser, R. L. Colescott, C. D. Bossinger and P. I. Cook, *Anal. Biochem.*, 1970, **34**, 595.
2. T. Vojkovsky, *Peptide Res.* 1995, **8**, 236.
3. (a) M. Wiesner, J. D. Revell and H. Wennemers, *Angew. Chem. Int. Ed.*, 2008, **47**, 1871; (b) M. Wiesner, M. Neuburger and H. Wennemers, *Chem. Eur. J.*, 2009, **15**, 10103.
4. T. Schnitzer and H. Wennemers, *J. Am. Chem. Soc.*, 2017, **139**, 15356.
5. E. Harder, W. Damm, J. Maple, C. Wu, M. Reboul, J. Y. Xiang, L. Wang, D. Lupyan, M. K. Dahlgren, J. L. Knight, J. W. Kaus, D. S. Cerutti, G. Krilov, W. L. Jorgensen, R. Abel and R. A. Friesner, *J. Chem. Theory Comput.*, 2016, **12**, 281.
6. (a) W. C. Still, A. Tempczyk, R. C. Hawley and T. Hendrickson, *J. Am. Chem. Soc.*, 1990, **112**, 6127; (b) D. Qiu, P. S. Shenkin, F. P. Hollinger and W. C. Still, *J. Phys. Chem. A*, 1997, **101**, 3005. Schrödinger, LLC, Schrödinger Release 2018-3: New York, NY, 2018.
7. (a) S. Grimme, J. Antony, S. Ehrlich and H. Krieg, *J. Chem. Phys.*, 2010, **132**, 154104; (b) S. Grimme, S. Ehrlich and L. Goerigk, *J. Comput. Chem.*, 2011, **32**, 1456; (c) Y. Zhao and D. G. Truhlar, *Theor. Chem. Acc.*, 2008, **120**, 215; (d) R. Krishnan, J. S. Binkley, R. Seeger and J. Pople, *J. Chem. Phys.*; 1980, **72**, 650. (e) A. D. McLean and G. S. Chandler, *J. Chem. Phys.*, 1980, **72**, 5639.
